# Supplementary material for: Iron and iron-bound phosphate accumulate in surface soils of ice-wedge polygons in arctic tundra
Source: Royal Society of Chemistry journal article supplement (doi:10.1039/d0em00142b), 2020-01-01
Supplement: d0em00142b1.csv [file d0em00142b1.csv]

Region	Locale	Site	Area	Site	Sample_IGSN	Core_IGSN	Sample_Name	Polygon	Feature	Horizon	Upper_depth_cm	Lower_depth_cm	LOI_%	Nitrogen_wt%	Carbon_wt%	GWC_gH2O_gsoil	VWC_cm3H2O_cm3	Bulk_density_g_cm3	PSI	Soil_pH	Exchangeable_Fe_mmol_kg	Organic_Fe_mmol_kg	SRO_Fe_mmol_kg	Crystalline_Fe_mmol_kg	Magnetite_Fe_mmol_kg	Water_SRP_mmol_kg	Dithionite_SRP_mmol_kg	Base_SRP_mmol_kg	Water_P_mmol_kg	Dithionite_P_mmol_kg	Base_P_mmol_kg	HumicAcid_P_mmol_kg	Acid_P_mmol_kg	Organic_P_mmol_kg
North Slope	Barrow	Site 1	Area A	Barrow Environmental Observatory	IEEMH006D	IEEMH000A	BEO_LCR1-O	Low-centered	Ridge	Organic	0	8	93.82	1.63	42.71	4.94	0.15	0.03	100.79	4.07	6.8	260	115	8.7	bdl	2.07	4.50	9.19	1.10	bdl	9.85	0.63	0.19	1.29
North Slope	Barrow	Site 1	Area A	Barrow Environmental Observatory	IEEMH006E	IEEMH000A	BEO_LCR1-M	Low-centered	Ridge	Mineral	8	19	33.50	0.80	14.53	0.84	0.44	0.53	36.64	4.11	bdl	59	84	17.4	19.4	0.03	0.81	1.39	bdl	bdl	2.25	0.84	5.13	1.71
North Slope	Barrow	Site 1	Area A	Barrow Environmental Observatory	IEEMH006F	IEEMH000B	BEO_LCR2-O	Low-centered	Ridge	Organic	0	7	89.01	2.03	43.2	3.67	0.10	0.03	77.44	4.06	14.3	319	182	11.1	0.6	-9999	-9999	-9999	-9999	-9999	-9999	-9999	-9999	-9999
North Slope	Barrow	Site 1	Area A	Barrow Environmental Observatory	IEEMH006G	IEEMH000B	BEO_LCR2-M	Low-centered	Ridge	Mineral	7	21	35.58	1.00	18.05	1.04	0.38	0.37	42.74	4.12	0.9	86	46	7.2	4.3	-9999	-9999	-9999	-9999	-9999	-9999	-9999	-9999	-9999
North Slope	Barrow	Site 1	Area A	Barrow Environmental Observatory	IEEMH006H	IEEMH000C	BEO_LCR3-O	Low-centered	Ridge	Organic	0	8	86.08	1.74	41.65	3.34	0.11	0.03	61.90	4.04	8.9	265	480	18.1	bdl	0.37	4.33	6.75	bdl	4.80	5.97	1.43	0.01	1.43
North Slope	Barrow	Site 1	Area A	Barrow Environmental Observatory	IEEMH006I	IEEMH000C	BEO_LCR3-M	Low-centered	Ridge	Mineral	8	19	29.05	0.79	16.62	0.88	0.37	0.42	34.61	4.15	4.1	63	58	8.0	5.7	0.02	0.35	1.12	bdl	bdl	2.22	0.95	4.91	2.08
North Slope	Barrow	Site 1	Area A	Barrow Environmental Observatory	IEEMH006J	IEEMH000D	BEO_LCT1-O	Low-centered	Trough	Organic	0	12	82.92	1.82	40.64	9.16	0.33	0.04	143.06	5.09	164.1	141	105	15.0	bdl	0.65	6.68	8.76	1.08	bdl	11.98	0.49	1.31	4.15
North Slope	Barrow	Site 1	Area A	Barrow Environmental Observatory	IEEMH006K	IEEMH000D	BEO_LCT1-M	Low-centered	Trough	Mineral	12	20	19.67	0.59	9.64	0.60	0.52	0.87	45.30	4.95	46.3	16	48	18.4	14.2	0.03	0.30	1.01	bdl	bdl	2.80	1.09	4.20	2.90
North Slope	Barrow	Site 1	Area A	Barrow Environmental Observatory	IEEMH006L	IEEMH000E	BEO_LCT2-O	Low-centered	Trough	Organic	0	12	62.90	1.79	33.65	6.55	0.49	0.07	62.18	4.63	184.6	154	58	12.6	2.2	-9999	-9999	-9999	-9999	-9999	-9999	-9999	-9999	-9999
North Slope	Barrow	Site 1	Area A	Barrow Environmental Observatory	IEEMH006M	IEEMH000E	BEO_LCT2-M	Low-centered	Trough	Mineral	12	20	21.58	0.61	11.48	0.86	0.62	0.72	24.84	4.71	90.3	27	22	10.1	8.1	-9999	-9999	-9999	-9999	-9999	-9999	-9999	-9999	-9999
North Slope	Barrow	Site 1	Area A	Barrow Environmental Observatory	IEEMH006N	IEEMH000F	BEO_LCT3-O	Low-centered	Trough	Organic	0	12	24.40	0.79	14.8	1.76	0.90	0.51	53.28	4.98	61.4	45	34	17.6	12.7	0.15	0.87	2.70	0.22	bdl	3.94	1.13	1.81	2.45
North Slope	Barrow	Site 1	Area A	Barrow Environmental Observatory	IEEMH006O	IEEMH000F	BEO_LCT3-M	Low-centered	Trough	Mineral	12	21	40.70	1.00	20.31	2.18	0.63	0.29	55.75	4.90	72.2	23	34	10.2	bdl	0.04	0.53	1.03	0.04	bdl	3.82	0.86	2.68	3.65
North Slope	Barrow	Site 1	Area A	Barrow Environmental Observatory	IEEMH0007	IEEMH0007	BEO_LCC1-O	Low-centered	Center	Organic	0	13	86.77	2.34	44.8	4.90	0.12	0.02	63.33	4.04	16.2	95	57	4.1	bdl	0.64	3.78	6.84	0.70	bdl	8.97	0.72	0.16	2.90
North Slope	Barrow	Site 1	Area A	Barrow Environmental Observatory	IEEMH0008	IEEMH0008	BEO_LCC2-O	Low-centered	Center	Organic	0	12	28.30	0.93	15.99	1.19	0.54	0.45	44.63	4.46	62.7	28	29	12.4	13.0	-9999	-9999	-9999	-9999	-9999	-9999	-9999	-9999	-9999
North Slope	Barrow	Site 1	Area A	Barrow Environmental Observatory	IEEMH0009	IEEMH0009	BEO_LCC3-O	Low-centered	Center	Organic	0	17	29.75	0.96	17.05	1.03	0.42	0.41	45.00	4.60	20.8	77	150	11.0	6.1	0.05	0.20	1.54	bdl	bdl	2.31	0.88	1.74	1.65
North Slope	Barrow	Site 1	Area B	Barrow Environmental Observatory	IEEMH0061	IEEMH0001	BEO_HCC1-O	High-centered	Center	Organic	0	12	68.44	1.30	35.1	2.19	0.14	0.06	37.77	3.74	0.6	140	130	10.0	2.0	0.10	2.58	2.99	1.09	2.09	9.50	1.77	1.19	9.28
North Slope	Barrow	Site 1	Area B	Barrow Environmental Observatory	IEEMH0062	IEEMH0001	BEO_HCC1-M	High-centered	Center	Mineral	12	29.5	27.49	0.74	14.93	0.74	0.37	0.50	38.25	4.40	19.1	44	54	19.5	12.2	-9999	-9999	-9999	-9999	-9999	-9999	-9999	-9999	-9999
North Slope	Barrow	Site 1	Area B	Barrow Environmental Observatory	IEEMH0063	IEEMH0002	BEO_HCC2-O	High-centered	Center	Organic	0	8	88.51	1.91	43.91	3.91	0.10	0.03	42.80	4.01	16.7	170	31	6.8	0.8	-9999	-9999	-9999	-9999	-9999	-9999	-9999	-9999	-9999
North Slope	Barrow	Site 1	Area B	Barrow Environmental Observatory	IEEMH0064	IEEMH0002	BEO_HCC2-M	High-centered	Center	Mineral	8	26.5	27.55	0.88	16.91	0.54	0.22	0.41	31.22	4.09	3.9	46	52	7.7	4.0	-9999	-9999	-9999	-9999	-9999	-9999	-9999	-9999	-9999
North Slope	Barrow	Site 1	Area B	Barrow Environmental Observatory	IEEMH0065	IEEMH0003	BEO_HCC3-O	High-centered	Center	Organic	0	12	69.62	0.28	6.24	0.65	0.80	1.23	22.70	4.06	0.2	16	58	14.2	10.1	0.26	0.17	0.66	0.21	bdl	1.09	0.59	6.00	1.02
North Slope	Barrow	Site 1	Area B	Barrow Environmental Observatory	IEEMH0066	IEEMH0003	BEO_HCC3-M	High-centered	Center	Mineral	12	29	9.66	0.34	5.81	0.29	0.37	1.28	26.58	4.13	bdl	11	79	16.4	10.6	0.02	0.06	0.57	0.17	bdl	0.76	0.52	5.17	0.85
North Slope	Barrow	Site 1	Area B	Barrow Environmental Observatory	IEEMH0067	IEEMH0004	BEO_HCT1-O	High-centered	Trough	Organic	0	13	52.20	1.35	27.37	3.23	0.46	0.14	73.82	5.09	234.8	148	640	51.4	11.6	0.08	3.45	2.81	0.29	bdl	9.11	1.10	2.29	7.61
North Slope	Barrow	Site 1	Area B	Barrow Environmental Observatory	IEEMH0068	IEEMH0004	BEO_HCT1-M	High-centered	Trough	Mineral	13	24.5	20.37	0.68	10.15	0.73	0.60	0.82	56.71	5.51	-9999	41	114	43.4	21.0	-9999	-9999	-9999	-9999	-9999	-9999	-9999	-9999	-9999
North Slope	Barrow	Site 1	Area B	Barrow Environmental Observatory	IEEMH0069	IEEMH0005	BEO_HCT2-O	High-centered	Trough	Organic	0	8	68.51	1.52	34.9	6.07	0.40	0.07	71.10	5.09	12.2	166	128	11.2	4.5	-9999	-9999	-9999	-9999	-9999	-9999	-9999	-9999	-9999
North Slope	Barrow	Site 1	Area B	Barrow Environmental Observatory	IEEMH006A	IEEMH0005	BEO_HCT2-M	High-centered	Trough	Mineral	8	26.5	31.68	0.68	15.1	1.34	0.66	0.50	-9999	4.95	57.3	59	116	17.7	7.0	-9999	-9999	-9999	-9999	-9999	-9999	-9999	-9999	-9999
North Slope	Barrow	Site 1	Area B	Barrow Environmental Observatory	IEEMH006B	IEEMH0006	BEO_HCT3-O	High-centered	Trough	Organic	0	12.5	73.84	1.41	35.86	6.67	0.40	0.06	44.97	4.75	37.8	79	23	3.5	bdl	0.37	3.01	5.36	1.91	bdl	6.95	0.38	0.16	3.51
North Slope	Barrow	Site 1	Area B	Barrow Environmental Observatory	IEEMH006C	IEEMH0006	BEO_HCT3-M	High-centered	Trough	Mineral	12.5	25.5	62.82	0.92	44.6	2.88	0.07	0.02	40.29	4.82	51.6	47	20	6.7	3.3	1.19	0.71	1.89	1.40	bdl	5.11	0.76	0.24	4.19
