# Supplementary material for: Iron and iron-bound phosphate accumulate in surface soils of ice-wedge polygons in arctic tundra
Source: Royal Society of Chemistry journal article supplement (doi:10.1039/d0em00142b), 2020-01-01
Supplement: d0em00142b3.csv [file d0em00142b3.csv]

energy_eV	21_BEO_LCR2_O	22_BEO_LCR2_M	23_BEO_HCT2_O	24_BEO_HCT1_M	25_BEO_HCC2_O	26_BEO_LCC2_O	27_BEO_HCC1_M	28_BEO_LCT2_O	30_BEO_LCT2_M	56_BEO_HCC3_00-04	57_BEO_HCC3_04-08	58_BEO_HCC3_08-12	59_BEO_HCC3_12-16	60_BEO_HCC3_16-20	61_BEO_HCC3_20-24	62_BEO_HCC3_24-29	63_BEO_LCC1_00-04	64_BEO_LCC1_04-08	65_BEO_LCC1_08-13	69_BEO_LCR3_00-04	70_BEO_LCR3_04-08	71_BEO_LCR3_08-12	72_BEO_LCR3_12-16	73_BEO_LCR3_16-19	74_BEO_LCT1_00-04	75_BEO_LCT1_04-08	76_BEO_LCT1_08-12	77_BEO_LCT1_12-16	78_BEO_LCT1_16-20	88_BEO_HCT2_00-04	89_BEO_HCT2_04-08	90_BEO_HCT2_08-12	91_BEO_HCT2_12-16	92_BEO_HCT2_16-20	93_BEO_HCT2_20-26	Fe_foil_FeXANES.e	REF_merged_(measured)	Biotite_ETH.e	Vivianite_borch_notcalib.e	goethite_03222018	IronIIIoxalate_03222018	IronIIoxalate_03222018	Ferrihydrite_2L_Kim_FeXANES.e	hematite_03222018	IronIIIcitrate_03222018
6973.05	0.005	0.006	0.010	0.004	0.017	0.005	0.005	0.003	0.004	0.020	0.016	0.012	0.011	0.008	0.004	0.005	0.005	0.004	0.006	0.006	0.006	0.008	0.007	0.003	0.004	0.005	0.005	0.005	0.004	0.016	0.035	0.010	0.008	0.023	0.009	0.000	0.001	0.001	0.002	-0.002	-0.002	-0.001	0.001	0.000	-0.003
6978.05	0.003	0.003	0.005	0.002	0.012	0.002	0.003	0.002	0.002	0.012	0.010	0.007	0.005	0.004	0.003	0.002	0.003	0.002	0.004	0.004	0.003	0.004	0.004	0.001	0.003	0.003	0.003	0.002	0.002	0.010	0.026	0.008	0.005	0.015	0.007	0.000	0.001	0.001	0.001	0.003	0.003	0.001	0.001	0.001	0.003
6983.05	0.002	0.002	0.003	0.002	0.010	0.002	0.002	0.001	0.001	0.007	0.005	0.003	0.004	0.002	0.001	0.001	0.002	0.002	0.002	0.002	0.002	0.002	0.002	0.001	0.002	0.002	0.002	0.002	0.001	0.007	0.019	0.005	0.002	0.010	0.005	0.000	0.001	0.001	0.001	0.002	0.003	0.001	0.001	0.001	0.003
6988.05	0.002	0.002	0.001	0.001	0.007	0.001	0.001	0.001	0.001	0.005	0.005	0.003	0.002	0.001	0.001	0.001	0.002	0.001	0.002	0.001	0.002	0.002	0.001	0.000	0.001	0.001	0.002	0.001	0.001	0.004	0.013	0.002	0.001	0.008	0.004	0.000	0.001	0.000	0.001	0.002	0.002	0.001	0.001	0.001	0.002
6993.05	0.001	0.000	0.000	0.001	0.006	0.001	0.001	0.001	0.001	0.003	0.006	0.001	0.001	0.001	0.001	0.000	0.001	0.001	0.001	0.000	0.001	0.001	0.000	0.000	0.001	0.001	0.001	0.001	0.000	0.004	0.009	-0.002	0.000	0.006	0.003	0.000	0.001	0.000	0.001	0.001	0.002	0.001	0.001	0.001	0.001
6998.05	0.001	0.000	-0.001	0.001	0.006	0.000	0.001	0.000	0.000	0.003	0.004	0.001	0.000	0.000	0.000	0.000	0.001	0.000	0.001	0.000	0.001	-0.001	0.000	0.000	0.001	0.001	0.001	0.000	0.000	0.002	0.008	0.005	0.000	0.004	0.001	0.000	0.000	0.000	0.001	0.000	0.001	0.001	0.001	0.000	0.001
7003.05	0.000	-0.001	-0.001	0.000	0.003	-0.001	0.000	0.000	0.000	0.000	0.002	-0.001	-0.001	-0.001	0.000	0.000	0.000	0.000	0.001	-0.001	0.000	-0.001	-0.001	0.001	0.000	0.000	0.000	-0.001	0.000	0.000	0.006	-0.001	-0.001	0.002	0.000	0.000	0.000	0.000	0.000	0.000	0.001	0.000	0.000	0.000	0.000
7008.05	0.000	0.000	-0.002	0.000	0.003	0.000	0.001	0.000	0.000	-0.001	0.002	-0.001	-0.001	-0.001	0.000	-0.001	0.000	0.000	0.000	-0.001	0.000	-0.001	-0.001	0.001	0.000	0.000	0.000	-0.001	-0.001	0.000	0.004	-0.003	-0.002	0.002	-0.001	0.000	0.000	0.000	0.000	-0.001	0.000	0.000	0.000	0.000	0.000
7013.05	0.000	-0.002	-0.003	-0.001	-0.002	-0.002	-0.002	-0.001	-0.001	-0.004	-0.003	-0.006	-0.004	-0.003	-0.001	-0.002	-0.001	-0.001	-0.001	-0.002	-0.001	-0.003	-0.002	0.000	0.000	-0.001	-0.001	-0.002	-0.001	-0.003	-0.002	-0.004	-0.002	0.000	-0.002	0.000	0.000	0.000	0.000	-0.001	0.000	0.000	0.000	0.000	-0.001
7018.05	0.000	-0.002	-0.003	-0.001	0.000	-0.001	-0.001	-0.001	-0.001	-0.005	-0.002	-0.005	-0.003	-0.003	-0.001	-0.002	-0.001	-0.001	-0.001	-0.002	-0.001	-0.002	-0.002	0.000	-0.001	-0.001	-0.001	-0.001	-0.001	-0.004	-0.001	-0.006	-0.003	-0.002	-0.004	0.000	0.000	0.000	0.000	-0.001	-0.001	-0.001	-0.001	0.000	0.000
7023.05	-0.001	-0.002	-0.003	-0.002	-0.002	-0.002	-0.002	-0.001	-0.002	-0.005	-0.003	-0.003	-0.004	-0.003	-0.002	-0.002	-0.001	-0.002	-0.002	-0.002	-0.002	-0.003	-0.002	-0.001	-0.001	-0.001	-0.001	-0.002	-0.001	-0.004	-0.001	-0.005	-0.003	-0.003	-0.004	0.000	-0.001	0.000	0.000	-0.001	-0.002	-0.001	-0.001	-0.001	-0.001
7028.05	-0.001	-0.003	-0.004	-0.002	-0.002	-0.002	-0.002	-0.002	-0.002	-0.004	-0.002	-0.005	-0.005	-0.003	-0.002	-0.002	-0.002	-0.002	-0.002	-0.003	-0.002	-0.003	-0.003	-0.001	-0.001	-0.001	-0.001	-0.002	-0.001	-0.006	-0.008	-0.006	-0.003	-0.004	-0.004	0.000	-0.001	0.000	-0.001	-0.002	-0.002	-0.001	-0.001	-0.001	-0.001
7033.05	-0.001	-0.003	-0.004	-0.002	-0.004	-0.002	-0.003	-0.002	-0.002	-0.006	-0.003	-0.007	-0.006	-0.003	-0.002	-0.002	-0.002	-0.002	-0.002	-0.003	-0.002	-0.003	-0.003	-0.002	-0.002	-0.002	-0.002	-0.002	-0.002	-0.006	-0.008	-0.006	-0.003	-0.005	-0.002	0.000	-0.001	0.000	-0.001	-0.001	-0.002	-0.001	-0.001	-0.001	-0.001
7038.05	-0.001	-0.002	-0.002	-0.002	-0.002	-0.001	-0.002	-0.001	-0.002	-0.002	-0.002	-0.004	-0.003	-0.003	-0.002	-0.001	-0.002	-0.002	-0.002	-0.002	-0.002	-0.003	-0.002	-0.002	-0.002	-0.002	-0.002	-0.002	-0.002	-0.006	-0.005	-0.006	-0.003	-0.004	-0.004	0.000	-0.001	0.000	-0.001	-0.001	-0.001	-0.001	-0.001	-0.001	-0.002
7043.05	-0.001	-0.003	-0.003	-0.002	-0.003	-0.003	-0.002	-0.002	-0.002	-0.003	-0.004	-0.007	-0.006	-0.003	-0.002	-0.002	-0.002	-0.002	-0.002	-0.003	-0.002	-0.003	-0.003	-0.002	-0.002	-0.002	-0.002	-0.002	-0.002	-0.005	-0.005	-0.005	-0.003	-0.005	-0.003	0.000	-0.001	-0.001	-0.001	-0.002	-0.002	-0.001	-0.001	-0.001	-0.002
7048.05	-0.001	-0.002	-0.003	-0.003	-0.005	-0.003	-0.003	-0.002	-0.002	-0.003	-0.005	-0.006	-0.004	-0.003	-0.002	-0.002	-0.002	-0.002	-0.002	-0.003	-0.002	-0.003	-0.003	-0.002	-0.002	-0.002	-0.002	-0.002	-0.002	-0.006	-0.009	-0.004	-0.003	-0.005	-0.004	0.000	-0.001	-0.001	-0.001	-0.002	-0.002	-0.001	-0.001	-0.001	-0.002
7053.05	-0.001	-0.003	-0.003	-0.002	-0.004	-0.002	-0.002	-0.002	-0.002	-0.001	-0.004	-0.004	-0.004	-0.002	-0.002	-0.002	-0.002	-0.002	-0.002	-0.002	-0.003	-0.002	-0.002	-0.002	-0.002	-0.002	-0.002	-0.003	-0.002	-0.006	-0.007	-0.005	-0.002	-0.004	-0.004	0.000	-0.001	-0.001	-0.001	-0.002	-0.002	-0.001	-0.001	-0.001	-0.002
7058.05	-0.001	-0.002	-0.002	-0.002	-0.004	-0.002	-0.003	-0.002	-0.002	0.001	-0.005	-0.005	-0.003	-0.002	-0.002	-0.002	-0.002	-0.002	-0.002	-0.002	-0.002	-0.002	-0.002	-0.002	-0.002	-0.002	-0.002	-0.003	-0.002	-0.004	-0.005	-0.003	-0.002	-0.004	-0.005	0.000	-0.001	-0.001	-0.001	-0.002	-0.001	-0.001	-0.001	-0.001	-0.002
7063.05	0.000	-0.001	-0.002	-0.002	-0.003	-0.001	-0.003	-0.001	-0.001	0.003	-0.003	-0.002	-0.003	-0.002	-0.001	-0.002	-0.002	-0.002	-0.002	-0.002	-0.002	-0.002	-0.002	-0.002	-0.002	-0.002	-0.002	-0.003	-0.001	-0.004	-0.003	-0.002	-0.002	-0.002	-0.003	0.000	-0.001	0.000	-0.001	-0.002	-0.002	-0.001	-0.001	-0.001	-0.002
7068.05	0.000	-0.001	-0.001	-0.001	-0.003	-0.002	-0.002	-0.001	-0.001	0.005	-0.003	-0.004	-0.002	-0.001	-0.001	-0.001	-0.002	-0.002	-0.002	-0.001	-0.001	-0.001	-0.001	-0.001	-0.002	-0.002	-0.002	-0.002	-0.001	-0.002	0.000	-0.002	-0.001	-0.003	-0.002	0.000	0.000	0.000	-0.001	-0.002	-0.001	-0.001	-0.001	-0.001	-0.001
7073.05	0.001	0.000	0.000	-0.001	-0.002	-0.001	-0.002	-0.001	-0.001	0.008	-0.001	-0.002	-0.001	0.001	-0.001	-0.001	-0.001	-0.001	-0.001	-0.001	-0.001	0.000	0.000	-0.001	-0.001	-0.001	-0.001	0.011	-0.001	-0.001	0.002	0.000	0.000	-0.001	0.000	0.000	0.001	0.000	-0.001	0.000	-0.001	0.000	-0.001	-0.001	-0.002
7078.05	0.002	0.001	0.002	0.001	0.003	0.003	0.000	0.001	0.001	0.015	0.004	0.007	0.004	0.003	0.001	0.000	0.000	0.000	0.000	0.002	0.000	0.002	0.002	0.000	0.000	0.000	0.000	-0.001	0.000	0.002	0.008	0.004	0.001	0.002	0.001	0.000	0.002	0.000	0.000	-0.001	-0.001	0.000	-0.001	0.000	-0.001
7083.05	0.002	0.000	0.002	0.001	-0.002	0.000	-0.001	0.001	0.001	0.011	0.000	0.001	0.001	0.001	0.001	0.001	0.000	0.000	0.000	0.001	0.000	0.001	0.001	0.000	0.000	0.000	0.000	-0.001	0.001	0.001	0.007	0.003	0.002	0.000	0.000	0.001	0.004	0.000	0.000	0.000	0.001	0.001	0.000	0.000	0.000
7088.05	0.004	0.003	0.003	0.002	0.001	0.002	0.004	0.002	0.002	0.015	0.004	0.004	0.006	0.003	0.002	0.002	0.001	0.001	0.001	0.003	0.001	0.003	0.002	0.002	0.001	0.001	0.001	0.001	0.002	0.004	0.011	0.005	0.003	0.003	0.003	0.002	0.007	0.001	0.001	0.001	0.001	0.002	0.000	0.001	0.001
7093.05	0.006	0.004	0.005	0.004	0.003	0.004	0.008	0.003	0.004	0.018	0.006	0.010	0.007	0.004	0.004	0.004	0.003	0.003	0.003	0.005	0.003	0.005	0.005	0.004	0.003	0.003	0.003	0.002	0.004	0.007	0.016	0.008	0.005	0.005	0.004	0.003	0.011	0.002	0.002	0.002	0.002	0.003	0.001	0.002	0.003
7094.55	0.007	0.005	0.006	0.005	0.004	0.005	0.007	0.004	0.004	0.020	0.006	0.011	0.008	0.005	0.004	0.005	0.004	0.004	0.004	0.006	0.004	0.006	0.005	0.004	0.004	0.004	0.004	0.003	0.004	0.007	0.016	0.009	0.006	0.006	0.005	0.003	0.013	0.002	0.003	0.002	0.002	0.003	0.001	0.002	0.003
7095.56	0.007	0.005	0.007	0.005	0.004	0.005	0.006	0.004	0.005	0.020	0.009	0.010	0.009	0.006	0.005	0.005	0.004	0.004	0.004	0.007	0.004	0.006	0.006	0.005	0.004	0.004	0.004	0.004	0.005	0.008	0.019	0.010	0.006	0.006	0.007	0.004	0.015	0.003	0.003	0.002	0.003	0.004	0.001	0.002	0.003
7097.06	0.008	0.006	0.008	0.006	0.006	0.006	0.007	0.005	0.006	0.023	0.008	0.011	0.009	0.006	0.006	0.006	0.005	0.005	0.004	0.007	0.005	0.007	0.007	0.005	0.005	0.005	0.005	0.004	0.006	0.008	0.021	0.011	0.007	0.007	0.007	0.005	0.017	0.003	0.004	0.003	0.003	0.004	0.001	0.003	0.004
7098.07	0.009	0.006	0.009	0.007	0.006	0.006	0.007	0.005	0.006	0.023	0.011	0.013	0.011	0.007	0.007	0.006	0.006	0.006	0.005	0.008	0.005	0.007	0.007	0.006	0.005	0.005	0.005	0.005	0.006	0.009	0.022	0.011	0.008	0.009	0.008	0.005	0.020	0.004	0.004	0.003	0.004	0.005	0.001	0.003	0.004
7099.57	0.010	0.007	0.010	0.008	0.007	0.007	0.008	0.006	0.007	0.025	0.009	0.015	0.012	0.008	0.007	0.007	0.006	0.007	0.007	0.009	0.006	0.008	0.008	0.007	0.006	0.006	0.006	0.006	0.007	0.011	0.023	0.013	0.009	0.010	0.008	0.006	0.023	0.004	0.005	0.004	0.004	0.005	0.002	0.004	0.005
7101.07	0.011	0.008	0.011	0.009	0.008	0.009	0.008	0.007	0.008	0.026	0.012	0.017	0.013	0.009	0.009	0.009	0.007	0.008	0.007	0.010	0.007	0.010	0.009	0.008	0.008	0.007	0.008	0.007	0.008	0.012	0.027	0.014	0.010	0.010	0.008	0.007	0.028	0.005	0.006	0.004	0.005	0.006	0.002	0.004	0.006
7102.08	0.012	0.009	0.012	0.010	0.008	0.009	0.009	0.008	0.009	0.028	0.014	0.016	0.015	0.010	0.009	0.009	0.008	0.009	0.008	0.011	0.008	0.011	0.010	0.009	0.009	0.008	0.008	0.008	0.009	0.013	0.027	0.016	0.011	0.011	0.011	0.008	0.032	0.006	0.007	0.005	0.005	0.007	0.004	0.005	0.006
7103.58	0.014	0.010	0.014	0.012	0.010	0.011	0.010	0.009	0.010	0.029	0.015	0.021	0.016	0.011	0.011	0.011	0.010	0.011	0.009	0.013	0.009	0.012	0.012	0.011	0.010	0.010	0.010	0.009	0.011	0.016	0.033	0.018	0.012	0.013	0.011	0.010	0.040	0.007	0.008	0.005	0.007	0.008	0.003	0.005	0.007
7104.58	0.015	0.011	0.016	0.013	0.011	0.012	0.011	0.010	0.012	0.032	0.018	0.022	0.017	0.012	0.012	0.012	0.011	0.012	0.010	0.014	0.011	0.013	0.013	0.012	0.011	0.011	0.011	0.010	0.012	0.016	0.031	0.019	0.013	0.013	0.014	0.012	0.046	0.008	0.009	0.006	0.007	0.009	0.004	0.006	0.008
7105.59	0.017	0.013	0.018	0.014	0.012	0.013	0.012	0.011	0.012	0.035	0.019	0.024	0.020	0.013	0.014	0.013	0.012	0.013	0.011	0.015	0.012	0.015	0.014	0.013	0.013	0.012	0.013	0.012	0.013	0.019	0.033	0.020	0.014	0.015	0.014	0.015	0.055	0.009	0.011	0.006	0.007	0.011	0.004	0.007	0.008
7106.59	0.019	0.015	0.019	0.016	0.014	0.015	0.013	0.013	0.014	0.038	0.022	0.026	0.023	0.015	0.015	0.015	0.014	0.015	0.012	0.017	0.013	0.016	0.015	0.015	0.014	0.014	0.014	0.013	0.015	0.021	0.033	0.021	0.016	0.016	0.016	0.018	0.067	0.010	0.012	0.007	0.008	0.012	0.005	0.008	0.009
7108.1	0.022	0.018	0.024	0.020	0.017	0.018	0.016	0.015	0.017	0.042	0.028	0.033	0.026	0.018	0.018	0.018	0.017	0.018	0.015	0.020	0.016	0.019	0.018	0.018	0.018	0.017	0.017	0.017	0.018	0.025	0.040	0.027	0.018	0.019	0.020	0.028	0.096	0.013	0.016	0.009	0.010	0.015	0.008	0.010	0.011
7109.1	0.026	0.022	0.030	0.024	0.022	0.021	0.019	0.018	0.020	0.053	0.038	0.041	0.031	0.021	0.022	0.021	0.020	0.021	0.017	0.023	0.019	0.022	0.021	0.021	0.021	0.020	0.020	0.021	0.021	0.031	0.045	0.027	0.020	0.022	0.023	0.042	0.138	0.016	0.019	0.011	0.011	0.018	0.010	0.012	0.012
7110.6	0.036	0.040	0.060	0.040	0.045	0.035	0.031	0.026	0.031	0.098	0.086	0.091	0.055	0.033	0.033	0.032	0.028	0.030	0.025	0.034	0.028	0.035	0.033	0.033	0.032	0.031	0.031	0.036	0.032	0.057	0.070	0.036	0.028	0.033	0.038	0.129	0.311	0.029	0.033	0.015	0.016	0.032	0.017	0.017	0.016
7111.61	0.055	0.061	0.096	0.061	0.072	0.050	0.046	0.040	0.043	0.152	0.141	0.145	0.084	0.047	0.047	0.044	0.044	0.047	0.038	0.050	0.043	0.048	0.047	0.048	0.050	0.049	0.047	0.052	0.048	0.093	0.101	0.045	0.038	0.048	0.060	0.229	0.455	0.037	0.042	0.024	0.025	0.039	0.031	0.029	0.025
7113.11	0.100	0.093	0.142	0.101	0.110	0.072	0.072	0.067	0.061	0.219	0.211	0.211	0.122	0.069	0.072	0.063	0.078	0.083	0.065	0.093	0.076	0.069	0.069	0.076	0.090	0.084	0.084	0.078	0.081	0.145	0.147	0.076	0.062	0.072	0.095	0.315	0.574	0.043	0.049	0.047	0.041	0.042	0.064	0.058	0.041
7114.62	0.106	0.103	0.172	0.111	0.130	0.081	0.079	0.069	0.064	0.273	0.269	0.264	0.146	0.078	0.079	0.068	0.080	0.085	0.066	0.119	0.082	0.078	0.077	0.083	0.095	0.088	0.089	0.088	0.087	0.172	0.180	0.078	0.065	0.077	0.110	0.366	0.626	0.050	0.055	0.053	0.040	0.050	0.054	0.066	0.042
7115.62	0.096	0.106	0.185	0.111	0.137	0.085	0.078	0.064	0.065	0.304	0.299	0.297	0.161	0.081	0.079	0.070	0.071	0.077	0.060	0.112	0.077	0.081	0.079	0.081	0.088	0.082	0.082	0.091	0.082	0.184	0.195	0.070	0.062	0.075	0.113	0.378	0.641	0.065	0.066	0.050	0.034	0.066	0.055	0.065	0.038
7117.12	0.106	0.134	0.213	0.137	0.155	0.115	0.098	0.080	0.100	0.341	0.338	0.342	0.196	0.109	0.106	0.104	0.082	0.088	0.070	0.117	0.087	0.107	0.103	0.104	0.101	0.096	0.094	0.123	0.098	0.207	0.219	0.089	0.077	0.086	0.128	0.426	0.671	0.138	0.116	0.056	0.040	0.115	0.063	0.070	0.045
7118.13	0.126	0.172	0.244	0.173	0.177	0.161	0.132	0.108	0.156	0.367	0.370	0.377	0.240	0.151	0.149	0.160	0.104	0.110	0.091	0.131	0.109	0.149	0.142	0.143	0.125	0.122	0.118	0.175	0.128	0.225	0.235	0.120	0.104	0.104	0.150	0.497	0.712	0.229	0.199	0.064	0.052	0.201	0.075	0.078	0.059
7119.63	0.183	0.274	0.324	0.270	0.236	0.284	0.222	0.184	0.299	0.434	0.444	0.465	0.354	0.267	0.264	0.303	0.162	0.168	0.148	0.169	0.166	0.263	0.248	0.247	0.187	0.190	0.179	0.309	0.206	0.273	0.283	0.186	0.181	0.153	0.201	0.623	0.782	0.475	0.423	0.092	0.079	0.453	0.120	0.110	0.095
7121.14	0.292	0.399	0.435	0.405	0.324	0.434	0.345	0.305	0.464	0.521	0.548	0.569	0.495	0.409	0.403	0.462	0.265	0.270	0.247	0.256	0.263	0.402	0.379	0.375	0.292	0.298	0.284	0.460	0.318	0.356	0.362	0.297	0.294	0.241	0.290	0.738	0.843	0.736	0.716	0.169	0.141	0.779	0.234	0.205	0.160
7122.14	0.399	0.499	0.524	0.516	0.402	0.537	0.444	0.413	0.580	0.589	0.624	0.642	0.594	0.510	0.506	0.566	0.367	0.370	0.344	0.354	0.359	0.501	0.476	0.468	0.392	0.396	0.383	0.563	0.414	0.437	0.434	0.402	0.396	0.331	0.376	0.794	0.871	0.853	0.874	0.263	0.216	0.965	0.347	0.324	0.236
7123.64	0.588	0.698	0.694	0.719	0.562	0.751	0.645	0.620	0.802	0.713	0.751	0.776	0.781	0.718	0.713	0.776	0.560	0.561	0.547	0.550	0.553	0.714	0.683	0.661	0.580	0.586	0.575	0.766	0.607	0.592	0.585	0.605	0.606	0.522	0.559	0.856	0.899	1.170	1.113	0.445	0.408	1.243	0.521	0.533	0.421
7124.65	0.715	0.823	0.802	0.838	0.688	0.889	0.782	0.763	0.936	0.800	0.829	0.859	0.899	0.855	0.843	0.905	0.701	0.699	0.696	0.679	0.695	0.853	0.819	0.792	0.712	0.723	0.714	0.892	0.742	0.710	0.700	0.745	0.753	0.679	0.702	0.887	0.912	1.350	1.272	0.577	0.577	1.472	0.645	0.663	0.586
7126.15	0.904	0.987	0.949	0.986	0.892	1.047	0.966	0.964	1.084	0.918	0.938	0.955	1.041	1.018	1.002	1.047	0.917	0.912	0.919	0.861	0.904	1.018	0.985	0.964	0.912	0.928	0.918	1.035	0.934	0.894	0.888	0.945	0.960	0.928	0.920	0.938	0.929	1.383	1.397	0.817	0.863	1.658	0.862	0.886	0.864
7127.66	1.067	1.142	1.092	1.121	1.087	1.201	1.141	1.132	1.223	1.031	1.038	1.062	1.177	1.186	1.167	1.198	1.108	1.100	1.119	1.023	1.087	1.190	1.158	1.125	1.076	1.109	1.101	1.183	1.109	1.067	1.070	1.142	1.164	1.157	1.121	1.007	0.949	1.458	1.324	1.085	1.109	1.512	1.090	1.109	1.121
7129.16	1.170	1.245	1.197	1.216	1.225	1.321	1.263	1.238	1.324	1.119	1.117	1.151	1.277	1.321	1.293	1.320	1.230	1.221	1.245	1.138	1.208	1.326	1.293	1.244	1.209	1.228	1.222	1.299	1.224	1.189	1.206	1.289	1.314	1.305	1.261	1.075	0.972	1.600	1.236	1.310	1.230	1.359	1.250	1.267	1.295
7130.66	1.215	1.271	1.238	1.239	1.281	1.334	1.299	1.275	1.329	1.160	1.157	1.179	1.295	1.349	1.322	1.335	1.278	1.270	1.299	1.195	1.256	1.354	1.319	1.276	1.255	1.272	1.269	1.317	1.265	1.247	1.269	1.333	1.363	1.365	1.315	1.101	0.984	1.404	1.198	1.381	1.302	1.259	1.344	1.321	1.368
7131.67	1.224	1.268	1.244	1.234	1.297	1.309	1.297	1.279	1.307	1.178	1.170	1.186	1.283	1.333	1.312	1.313	1.286	1.279	1.311	1.211	1.265	1.337	1.307	1.272	1.264	1.280	1.275	1.299	1.271	1.265	1.291	1.333	1.365	1.378	1.328	1.074	0.980	1.231	1.159	1.373	1.340	1.193	1.361	1.348	1.386
7133.17	1.224	1.251	1.240	1.217	1.302	1.266	1.279	1.272	1.263	1.198	1.187	1.196	1.256	1.293	1.281	1.265	1.286	1.278	1.309	1.215	1.265	1.296	1.274	1.253	1.262	1.277	1.273	1.260	1.264	1.279	1.301	1.312	1.342	1.381	1.326	1.013	0.964	1.079	1.095	1.345	1.370	1.087	1.330	1.374	1.398
7134.18	1.219	1.237	1.234	1.201	1.300	1.237	1.260	1.265	1.234	1.209	1.195	1.194	1.232	1.261	1.253	1.233	1.281	1.273	1.301	1.209	1.260	1.265	1.247	1.235	1.255	1.272	1.268	1.228	1.256	1.283	1.303	1.292	1.319	1.378	1.326	0.980	0.954	1.029	1.067	1.320	1.367	1.026	1.294	1.354	1.400
7135.68	1.207	1.213	1.217	1.179	1.291	1.196	1.232	1.249	1.192	1.221	1.210	1.199	1.201	1.212	1.213	1.184	1.270	1.261	1.282	1.197	1.249	1.216	1.202	1.209	1.242	1.257	1.256	1.182	1.239	1.283	1.303	1.259	1.281	1.364	1.311	0.959	0.944	0.969	1.058	1.276	1.331	0.974	1.242	1.291	1.394
7137.18	1.193	1.188	1.201	1.158	1.277	1.162	1.205	1.229	1.155	1.228	1.218	1.196	1.177	1.172	1.177	1.145	1.252	1.243	1.259	1.182	1.231	1.174	1.164	1.182	1.225	1.238	1.238	1.145	1.217	1.273	1.295	1.226	1.245	1.339	1.293	0.962	0.944	0.926	1.059	1.236	1.278	0.964	1.202	1.240	1.372
7138.19	1.176	1.171	1.187	1.142	1.258	1.141	1.183	1.209	1.135	1.221	1.214	1.194	1.163	1.151	1.155	1.123	1.232	1.224	1.238	1.169	1.214	1.150	1.142	1.164	1.206	1.219	1.221	1.126	1.201	1.260	1.284	1.203	1.221	1.312	1.271	0.975	0.948	0.918	1.052	1.203	1.237	0.966	1.171	1.206	1.344
7139.69	1.147	1.142	1.159	1.117	1.217	1.116	1.151	1.172	1.110	1.200	1.190	1.173	1.136	1.122	1.127	1.100	1.196	1.188	1.199	1.141	1.180	1.125	1.114	1.135	1.172	1.183	1.185	1.103	1.170	1.223	1.245	1.165	1.182	1.263	1.231	0.996	0.955	0.945	1.036	1.145	1.171	0.962	1.119	1.144	1.284
7140.7	1.124	1.122	1.135	1.100	1.185	1.099	1.130	1.145	1.096	1.167	1.163	1.146	1.115	1.105	1.111	1.088	1.167	1.162	1.170	1.120	1.156	1.109	1.098	1.116	1.147	1.158	1.159	1.090	1.145	1.190	1.215	1.139	1.158	1.226	1.202	1.002	0.958	0.981	1.026	1.112	1.133	0.960	1.088	1.105	1.239
7142.2	1.092	1.093	1.099	1.076	1.134	1.073	1.096	1.106	1.075	1.117	1.110	1.102	1.086	1.081	1.087	1.071	1.128	1.123	1.129	1.091	1.117	1.084	1.072	1.087	1.111	1.120	1.121	1.072	1.111	1.139	1.158	1.105	1.121	1.170	1.149	1.000	0.959	1.010	1.008	1.074	1.091	0.962	1.051	1.058	1.174
7143.7	1.065	1.056	1.067	1.051	1.092	1.049	1.065	1.071	1.051	1.070	1.072	1.064	1.055	1.058	1.063	1.052	1.093	1.090	1.093	1.065	1.083	1.060	1.046	1.059	1.079	1.087	1.087	1.051	1.078	1.099	1.107	1.075	1.090	1.121	1.105	0.996	0.958	0.986	0.976	1.047	1.064	0.961	1.032	1.030	1.116
7144.71	1.050	1.038	1.049	1.036	1.064	1.030	1.046	1.050	1.035	1.047	1.049	1.041	1.039	1.042	1.049	1.039	1.073	1.070	1.074	1.051	1.063	1.044	1.030	1.041	1.061	1.069	1.069	1.037	1.061	1.075	1.080	1.060	1.072	1.093	1.083	1.001	0.959	0.953	0.951	1.035	1.050	0.945	1.028	1.024	1.082
7146.21	1.029	1.013	1.028	1.017	1.031	1.004	1.019	1.021	1.010	1.018	1.021	1.015	1.014	1.019	1.028	1.018	1.044	1.043	1.047	1.035	1.036	1.019	1.006	1.016	1.036	1.042	1.041	1.018	1.035	1.047	1.047	1.035	1.047	1.058	1.051	1.017	0.963	0.903	0.910	1.018	1.030	0.899	1.020	1.023	1.037
7147.22	1.018	1.001	1.011	1.002	1.010	0.985	1.001	1.003	0.993	1.007	1.007	0.996	0.995	1.002	1.011	1.000	1.028	1.027	1.028	1.025	1.020	1.001	0.987	0.999	1.021	1.026	1.025	1.000	1.019	1.027	1.027	1.018	1.028	1.033	1.031	1.034	0.968	0.871	0.885	1.005	1.015	0.865	1.008	1.020	1.010
7148.72	0.996	0.972	0.985	0.979	0.979	0.954	0.972	0.976	0.963	0.981	0.981	0.969	0.964	0.970	0.983	0.971	1.002	1.002	0.999	1.009	0.994	0.968	0.955	0.972	0.996	1.000	1.000	0.971	0.992	0.999	0.996	0.989	0.995	1.002	1.000	1.055	0.977	0.830	0.853	0.973	0.985	0.827	0.976	1.001	0.973
7150.22	0.973	0.946	0.959	0.955	0.949	0.923	0.942	0.949	0.937	0.955	0.957	0.945	0.936	0.937	0.954	0.943	0.975	0.975	0.970	0.985	0.969	0.937	0.927	0.945	0.971	0.973	0.973	0.945	0.965	0.972	0.965	0.958	0.963	0.969	0.970	1.070	0.982	0.811	0.831	0.930	0.949	0.808	0.933	0.970	0.938
7151.23	0.957	0.932	0.943	0.941	0.930	0.907	0.925	0.932	0.921	0.941	0.944	0.934	0.920	0.919	0.937	0.927	0.957	0.958	0.951	0.970	0.951	0.918	0.908	0.929	0.953	0.956	0.956	0.928	0.949	0.954	0.947	0.941	0.942	0.946	0.951	1.075	0.985	0.812	0.822	0.901	0.923	0.806	0.907	0.949	0.914
7152.73	0.935	0.910	0.923	0.922	0.905	0.890	0.903	0.909	0.905	0.927	0.927	0.922	0.901	0.900	0.917	0.910	0.931	0.933	0.923	0.948	0.925	0.898	0.887	0.908	0.929	0.930	0.931	0.911	0.926	0.929	0.929	0.915	0.916	0.916	0.923	1.080	0.987	0.826	0.819	0.866	0.887	0.814	0.875	0.921	0.881
7153.73	0.922	0.901	0.914	0.914	0.889	0.883	0.892	0.896	0.898	0.920	0.920	0.915	0.895	0.891	0.907	0.903	0.916	0.917	0.906	0.934	0.911	0.889	0.878	0.897	0.915	0.916	0.917	0.905	0.912	0.917	0.915	0.900	0.902	0.899	0.910	1.080	0.988	0.838	0.824	0.849	0.865	0.825	0.859	0.905	0.860
7154.74	0.909	0.894	0.906	0.907	0.877	0.878	0.882	0.884	0.894	0.917	0.920	0.914	0.891	0.884	0.900	0.897	0.901	0.903	0.892	0.923	0.898	0.882	0.871	0.889	0.902	0.902	0.904	0.899	0.900	0.904	0.901	0.888	0.889	0.883	0.896	1.078	0.988	0.853	0.834	0.834	0.845	0.837	0.845	0.889	0.841
7155.74	0.898	0.887	0.902	0.902	0.866	0.875	0.875	0.874	0.892	0.912	0.919	0.913	0.889	0.880	0.894	0.895	0.889	0.890	0.879	0.913	0.886	0.878	0.866	0.881	0.891	0.891	0.892	0.896	0.891	0.894	0.892	0.877	0.880	0.867	0.881	1.074	0.987	0.866	0.847	0.822	0.828	0.849	0.834	0.875	0.824
7157.25	0.886	0.883	0.898	0.898	0.854	0.875	0.868	0.864	0.892	0.909	0.914	0.915	0.887	0.878	0.890	0.894	0.875	0.876	0.865	0.901	0.874	0.876	0.861	0.874	0.878	0.878	0.879	0.895	0.880	0.887	0.884	0.868	0.870	0.853	0.871	1.070	0.986	0.885	0.869	0.807	0.807	0.865	0.818	0.856	0.805
7158.63	0.880	0.881	0.896	0.896	0.850	0.877	0.865	0.860	0.894	0.911	0.917	0.921	0.891	0.879	0.888	0.897	0.866	0.868	0.857	0.893	0.865	0.875	0.862	0.873	0.871	0.871	0.873	0.898	0.875	0.879	0.878	0.864	0.867	0.846	0.865	1.068	0.986	0.903	0.890	0.798	0.792	0.881	0.811	0.844	0.794
7160.04	0.877	0.882	0.898	0.897	0.848	0.882	0.866	0.860	0.901	0.913	0.920	0.921	0.896	0.883	0.891	0.901	0.863	0.866	0.857	0.889	0.864	0.880	0.866	0.874	0.869	0.870	0.870	0.902	0.874	0.878	0.876	0.863	0.866	0.842	0.865	1.068	0.986	0.923	0.913	0.796	0.782	0.902	0.807	0.839	0.794
7161.47	0.880	0.888	0.903	0.902	0.851	0.892	0.873	0.866	0.910	0.920	0.927	0.930	0.903	0.892	0.898	0.909	0.866	0.870	0.860	0.890	0.867	0.889	0.873	0.881	0.872	0.872	0.875	0.911	0.878	0.882	0.886	0.869	0.871	0.848	0.868	1.064	0.986	0.947	0.936	0.799	0.780	0.926	0.808	0.840	0.802
7162.94	0.887	0.896	0.913	0.911	0.863	0.906	0.884	0.876	0.924	0.927	0.936	0.939	0.917	0.903	0.908	0.921	0.876	0.879	0.872	0.894	0.876	0.901	0.885	0.891	0.881	0.882	0.883	0.921	0.888	0.890	0.894	0.875	0.882	0.859	0.879	1.059	0.985	0.972	0.957	0.810	0.786	0.956	0.815	0.846	0.818
7164.43	0.897	0.910	0.924	0.922	0.877	0.920	0.899	0.890	0.937	0.936	0.948	0.948	0.930	0.918	0.922	0.935	0.888	0.892	0.884	0.902	0.890	0.915	0.899	0.903	0.894	0.894	0.896	0.934	0.901	0.901	0.907	0.891	0.897	0.875	0.891	1.053	0.984	0.992	0.977	0.826	0.799	0.992	0.827	0.856	0.840
7165.94	0.912	0.927	0.936	0.935	0.895	0.936	0.914	0.908	0.953	0.949	0.959	0.961	0.947	0.934	0.936	0.949	0.906	0.909	0.905	0.915	0.906	0.931	0.916	0.920	0.909	0.911	0.914	0.948	0.917	0.911	0.922	0.906	0.915	0.895	0.910	1.049	0.983	1.006	0.994	0.847	0.821	1.030	0.843	0.868	0.866
7167.49	0.928	0.940	0.950	0.949	0.915	0.950	0.933	0.926	0.967	0.963	0.975	0.972	0.963	0.950	0.952	0.963	0.926	0.928	0.924	0.930	0.926	0.948	0.934	0.936	0.927	0.930	0.931	0.962	0.934	0.927	0.938	0.924	0.933	0.918	0.930	1.046	0.982	1.016	1.009	0.872	0.847	1.063	0.864	0.883	0.895
7169.06	0.946	0.957	0.968	0.964	0.937	0.966	0.950	0.946	0.980	0.976	0.987	0.984	0.977	0.965	0.968	0.976	0.946	0.949	0.947	0.946	0.946	0.965	0.950	0.953	0.946	0.950	0.951	0.977	0.953	0.945	0.957	0.942	0.952	0.942	0.950	1.040	0.981	1.024	1.022	0.899	0.878	1.089	0.888	0.904	0.923
7170.66	0.964	0.974	0.984	0.978	0.959	0.982	0.969	0.966	0.994	0.995	1.002	0.997	0.994	0.981	0.983	0.990	0.967	0.969	0.968	0.964	0.965	0.980	0.966	0.970	0.965	0.969	0.970	0.990	0.972	0.967	0.979	0.962	0.971	0.970	0.973	1.032	0.979	1.036	1.037	0.927	0.910	1.107	0.913	0.930	0.949
7172.29	0.981	0.992	1.002	0.995	0.981	0.999	0.988	0.986	1.011	1.014	1.023	1.016	1.012	0.999	1.000	1.006	0.989	0.989	0.989	0.980	0.985	0.999	0.985	0.987	0.985	0.990	0.991	1.006	0.991	0.987	0.998	0.984	0.995	0.994	0.996	1.020	0.976	1.049	1.048	0.955	0.942	1.118	0.940	0.962	0.976
7173.95	1.000	1.011	1.022	1.011	1.007	1.018	1.008	1.005	1.028	1.032	1.040	1.035	1.030	1.018	1.019	1.023	1.011	1.011	1.011	0.998	1.005	1.019	1.003	1.005	1.005	1.011	1.011	1.023	1.011	1.011	1.023	1.007	1.017	1.016	1.020	1.002	0.972	1.060	1.052	0.984	0.976	1.114	0.965	0.997	1.002
7175.63	1.016	1.027	1.039	1.025	1.029	1.037	1.027	1.024	1.044	1.050	1.054	1.052	1.046	1.037	1.037	1.040	1.030	1.029	1.030	1.015	1.024	1.038	1.024	1.013	1.024	1.030	1.029	1.039	1.028	1.030	1.047	1.025	1.038	1.040	1.040	0.984	0.967	1.070	1.051	1.010	1.006	1.102	0.985	1.026	1.025
7177.34	1.025	1.038	1.050	1.034	1.042	1.047	1.039	1.034	1.053	1.062	1.066	1.062	1.056	1.049	1.048	1.049	1.041	1.039	1.041	1.027	1.035	1.050	1.035	1.033	1.033	1.042	1.040	1.050	1.039	1.043	1.057	1.038	1.050	1.053	1.054	0.970	0.962	1.073	1.045	1.023	1.025	1.085	0.996	1.043	1.037
7179.08	1.031	1.044	1.055	1.039	1.051	1.054	1.045	1.040	1.058	1.065	1.071	1.070	1.061	1.056	1.053	1.056	1.048	1.046	1.048	1.032	1.042	1.056	1.042	1.042	1.040	1.049	1.047	1.056	1.045	1.051	1.065	1.047	1.057	1.064	1.063	0.961	0.958	1.071	1.039	1.027	1.039	1.068	1.006	1.054	1.045
7180.84	1.035	1.048	1.060	1.042	1.057	1.057	1.050	1.044	1.061	1.069	1.071	1.072	1.065	1.060	1.058	1.060	1.054	1.050	1.053	1.037	1.046	1.062	1.048	1.045	1.046	1.054	1.051	1.060	1.050	1.058	1.070	1.052	1.063	1.069	1.068	0.959	0.958	1.066	1.033	1.026	1.049	1.054	1.013	1.059	1.049
7182.63	1.037	1.049	1.060	1.043	1.058	1.060	1.053	1.047	1.064	1.067	1.067	1.074	1.066	1.063	1.061	1.062	1.055	1.053	1.054	1.039	1.048	1.063	1.049	1.047	1.048	1.056	1.053	1.062	1.051	1.058	1.072	1.053	1.065	1.070	1.068	0.964	0.959	1.060	1.030	1.023	1.054	1.044	1.018	1.060	1.052
7184.45	1.038	1.048	1.058	1.042	1.058	1.059	1.053	1.047	1.062	1.063	1.065	1.069	1.062	1.061	1.060	1.062	1.057	1.054	1.055	1.040	1.049	1.064	1.049	1.048	1.047	1.057	1.054	1.059	1.052	1.058	1.069	1.055	1.064	1.072	1.067	0.974	0.963	1.052	1.028	1.021	1.056	1.038	1.019	1.058	1.053
7186.3	1.037	1.048	1.054	1.041	1.054	1.056	1.052	1.047	1.061	1.058	1.055	1.062	1.059	1.059	1.058	1.059	1.056	1.053	1.055	1.039	1.049	1.061	1.049	1.046	1.047	1.057	1.053	1.058	1.052	1.055	1.060	1.053	1.064	1.071	1.067	0.990	0.968	1.043	1.025	1.020	1.055	1.032	1.020	1.056	1.054
7188.17	1.038	1.046	1.051	1.039	1.053	1.053	1.050	1.047	1.058	1.052	1.048	1.054	1.055	1.058	1.057	1.057	1.056	1.054	1.057	1.037	1.050	1.060	1.047	1.046	1.047	1.056	1.054	1.056	1.052	1.053	1.061	1.051	1.064	1.070	1.066	1.009	0.974	1.032	1.021	1.020	1.051	1.024	1.019	1.053	1.057
7190.07	1.038	1.043	1.047	1.038	1.050	1.050	1.049	1.046	1.056	1.047	1.042	1.050	1.049	1.054	1.054	1.054	1.057	1.054	1.056	1.037	1.049	1.056	1.044	1.044	1.047	1.054	1.053	1.051	1.051	1.051	1.059	1.049	1.060	1.069	1.064	1.029	0.981	1.020	1.015	1.019	1.047	1.016	1.017	1.050	1.059
7192	1.036	1.039	1.042	1.034	1.049	1.045	1.046	1.043	1.051	1.042	1.037	1.043	1.043	1.048	1.050	1.048	1.055	1.052	1.054	1.035	1.047	1.051	1.040	1.041	1.044	1.053	1.052	1.048	1.050	1.045	1.053	1.046	1.057	1.067	1.061	1.047	0.988	1.007	1.008	1.018	1.043	1.007	1.015	1.045	1.060
7193.96	1.035	1.038	1.039	1.031	1.044	1.039	1.041	1.041	1.045	1.037	1.030	1.037	1.037	1.043	1.046	1.043	1.052	1.050	1.054	1.032	1.046	1.045	1.036	1.038	1.043	1.050	1.049	1.042	1.047	1.044	1.051	1.043	1.052	1.064	1.057	1.055	0.992	0.993	0.999	1.017	1.038	0.998	1.011	1.037	1.061
7195.94	1.032	1.034	1.034	1.027	1.039	1.031	1.036	1.038	1.038	1.034	1.024	1.030	1.032	1.036	1.040	1.037	1.048	1.047	1.051	1.030	1.043	1.041	1.029	1.033	1.039	1.047	1.047	1.036	1.044	1.039	1.046	1.037	1.048	1.061	1.053	1.048	0.992	0.979	0.990	1.016	1.033	0.986	1.008	1.028	1.059
7197.95	1.029	1.029	1.028	1.022	1.036	1.024	1.032	1.033	1.032	1.029	1.021	1.024	1.025	1.030	1.036	1.032	1.046	1.045	1.048	1.027	1.040	1.034	1.023	1.030	1.035	1.043	1.043	1.030	1.040	1.035	1.040	1.035	1.042	1.054	1.048	1.031	0.988	0.968	0.982	1.014	1.028	0.976	1.006	1.020	1.056
7199.99	1.026	1.023	1.022	1.017	1.031	1.017	1.026	1.028	1.025	1.018	1.015	1.015	1.018	1.022	1.029	1.024	1.041	1.040	1.042	1.024	1.035	1.026	1.018	1.024	1.031	1.038	1.038	1.023	1.035	1.030	1.034	1.029	1.037	1.047	1.043	1.008	0.982	0.961	0.974	1.011	1.021	0.968	1.001	1.011	1.050
7202.06	1.021	1.014	1.016	1.012	1.023	1.010	1.018	1.022	1.018	1.012	1.008	1.008	1.010	1.015	1.022	1.017	1.034	1.034	1.035	1.020	1.029	1.017	1.008	1.018	1.026	1.032	1.032	1.016	1.029	1.022	1.028	1.023	1.028	1.040	1.031	0.982	0.975	0.957	0.968	1.006	1.013	0.963	0.997	1.002	1.042
7204.15	1.016	1.009	1.008	1.006	1.015	1.002	1.012	1.016	1.011	1.006	0.998	0.999	1.003	1.008	1.014	1.010	1.028	1.028	1.027	1.015	1.022	1.008	1.001	1.010	1.020	1.025	1.025	1.010	1.021	1.016	1.017	1.015	1.022	1.030	1.026	0.958	0.967	0.957	0.964	0.999	1.004	0.960	0.992	0.993	1.031
7206.27	1.010	1.003	1.001	1.001	1.008	0.996	1.005	1.009	1.004	0.999	0.992	0.990	0.995	1.000	1.008	1.004	1.020	1.020	1.019	1.011	1.015	1.002	0.993	1.003	1.013	1.018	1.018	1.003	1.014	1.008	1.010	1.008	1.013	1.021	1.018	0.943	0.961	0.959	0.963	0.991	0.994	0.957	0.986	0.986	1.019
7208.42	1.004	0.995	0.996	0.996	0.999	0.990	0.997	1.001	0.999	0.988	0.984	0.985	0.989	0.994	1.002	0.998	1.012	1.013	1.010	1.006	1.007	0.995	0.986	0.995	1.007	1.011	1.010	0.998	1.007	1.002	1.003	1.002	1.005	1.013	1.005	0.950	0.961	0.964	0.962	0.982	0.984	0.955	0.979	0.981	1.005
7210.59	0.999	0.990	0.991	0.991	0.990	0.984	0.991	0.994	0.993	0.984	0.978	0.981	0.984	0.989	0.997	0.994	1.005	1.005	1.001	1.002	1.001	0.989	0.981	0.989	1.000	1.003	1.004	0.994	1.000	0.994	0.995	0.995	0.999	1.004	1.000	0.984	0.970	0.970	0.963	0.973	0.973	0.953	0.974	0.978	0.992
7212.79	0.993	0.985	0.985	0.988	0.982	0.981	0.985	0.988	0.990	0.979	0.975	0.979	0.980	0.985	0.991	0.990	0.998	0.998	0.993	0.996	0.993	0.984	0.975	0.984	0.994	0.997	0.997	0.990	0.993	0.989	0.990	0.991	0.994	0.995	0.992	1.040	0.988	0.978	0.965	0.966	0.963	0.953	0.969	0.977	0.980
7215.02	0.989	0.982	0.984	0.985	0.978	0.980	0.981	0.983	0.988	0.978	0.972	0.976	0.979	0.983	0.989	0.988	0.993	0.993	0.988	0.992	0.988	0.980	0.972	0.982	0.990	0.992	0.992	0.988	0.988	0.985	0.986	0.986	0.989	0.986	0.989	1.102	1.007	0.987	0.969	0.960	0.954	0.955	0.966	0.978	0.972
7217.28	0.986	0.979	0.983	0.984	0.973	0.979	0.979	0.980	0.987	0.978	0.975	0.979	0.981	0.981	0.987	0.987	0.988	0.989	0.983	0.991	0.984	0.979	0.971	0.979	0.986	0.989	0.989	0.987	0.985	0.982	0.984	0.983	0.985	0.983	0.984	1.150	1.023	0.995	0.975	0.956	0.948	0.960	0.964	0.981	0.965
7219.56	0.984	0.980	0.985	0.984	0.973	0.979	0.978	0.978	0.987	0.983	0.981	0.983	0.983	0.981	0.987	0.988	0.986	0.987	0.980	0.988	0.982	0.980	0.970	0.978	0.984	0.987	0.987	0.988	0.983	0.982	0.981	0.982	0.985	0.979	0.984	1.172	1.032	0.998	0.980	0.954	0.944	0.969	0.963	0.986	0.961
7221.88	0.983	0.980	0.988	0.984	0.974	0.981	0.979	0.978	0.988	0.986	0.985	0.988	0.987	0.984	0.987	0.989	0.984	0.985	0.979	0.987	0.981	0.981	0.973	0.978	0.983	0.986	0.986	0.990	0.983	0.984	0.983	0.981	0.983	0.981	0.983	1.164	1.033	0.997	0.986	0.954	0.942	0.979	0.964	0.990	0.960
7224.21	0.983	0.983	0.989	0.986	0.975	0.982	0.979	0.978	0.990	0.993	0.992	0.994	0.990	0.984	0.988	0.989	0.984	0.986	0.980	0.989	0.982	0.983	0.974	0.979	0.983	0.986	0.987	0.990	0.984	0.982	0.986	0.981	0.983	0.979	0.985	1.129	1.026	0.993	0.990	0.955	0.942	0.989	0.965	0.992	0.960
7226.58	0.984	0.984	0.991	0.986	0.978	0.983	0.981	0.979	0.990	0.994	0.994	0.996	0.992	0.984	0.988	0.991	0.985	0.986	0.980	0.988	0.983	0.984	0.976	0.980	0.984	0.987	0.987	0.992	0.985	0.985	0.988	0.982	0.983	0.978	0.985	1.081	1.014	0.986	0.993	0.959	0.943	0.999	0.967	0.993	0.963
7228.97	0.985	0.984	0.992	0.986	0.979	0.984	0.981	0.980	0.990	0.998	0.997	0.998	0.993	0.985	0.989	0.990	0.987	0.987	0.982	0.989	0.983	0.983	0.976	0.981	0.984	0.988	0.988	0.991	0.986	0.987	0.989	0.982	0.985	0.981	0.985	1.028	0.999	0.980	0.995	0.963	0.946	1.008	0.967	0.991	0.966
7231.4	0.986	0.987	0.994	0.987	0.981	0.985	0.983	0.981	0.990	1.002	1.000	1.001	0.994	0.985	0.989	0.990	0.988	0.989	0.984	0.989	0.986	0.985	0.977	0.981	0.985	0.989	0.990	0.992	0.988	0.988	0.990	0.983	0.985	0.984	0.990	0.981	0.984	0.977	0.995	0.966	0.951	1.015	0.968	0.989	0.970
7233.84	0.987	0.988	0.996	0.988	0.986	0.987	0.985	0.985	0.993	1.006	1.006	1.008	0.996	0.988	0.990	0.991	0.991	0.991	0.986	0.990	0.988	0.987	0.980	0.984	0.986	0.991	0.991	0.993	0.990	0.991	0.995	0.983	0.986	0.986	0.991	0.944	0.971	0.976	0.994	0.969	0.957	1.020	0.967	0.988	0.974
7236.32	0.989	0.989	0.997	0.989	0.987	0.989	0.987	0.987	0.995	1.007	1.007	1.007	0.999	0.989	0.993	0.994	0.993	0.993	0.988	0.990	0.990	0.988	0.982	0.987	0.988	0.993	0.993	0.995	0.993	0.993	0.997	0.985	0.987	0.989	0.994	0.923	0.963	0.980	0.994	0.971	0.965	1.024	0.967	0.990	0.978
7238.82	0.990	0.992	0.999	0.990	0.990	0.993	0.990	0.990	0.999	1.008	1.010	1.010	1.002	0.992	0.996	0.999	0.995	0.995	0.992	0.991	0.993	0.993	0.986	0.990	0.990	0.995	0.995	0.999	0.995	0.996	0.998	0.988	0.990	0.993	0.994	0.918	0.961	0.989	0.993	0.974	0.973	1.026	0.965	0.991	0.983
7241.35	0.992	0.996	1.001	0.993	0.992	0.998	0.994	0.993	1.005	1.009	1.010	1.011	1.005	0.997	1.000	1.003	0.998	0.998	0.995	0.992	0.995	0.998	0.991	0.994	0.993	0.998	0.998	1.003	0.998	0.997	0.999	0.991	0.995	0.994	1.000	0.928	0.964	1.001	0.994	0.977	0.982	1.028	0.966	0.991	0.987
7243.91	0.994	0.999	1.004	0.997	0.996	1.003	0.999	0.996	1.009	1.008	1.007	1.010	1.007	1.003	1.004	1.008	1.000	1.000	0.997	0.993	0.997	1.002	0.996	0.998	0.995	1.001	1.001	1.008	1.002	0.998	1.003	0.993	0.998	0.997	1.000	0.946	0.970	1.015	0.996	0.980	0.991	1.028	0.965	0.989	0.991
7246.5	0.995	1.000	1.003	1.000	0.997	1.007	1.001	0.998	1.012	1.008	1.006	1.010	1.008	1.006	1.007	1.012	1.003	1.002	0.999	0.994	1.000	1.006	0.999	1.002	0.997	1.003	1.003	1.011	1.004	0.998	1.000	0.997	1.000	1.001	1.001	0.962	0.977	1.025	1.001	0.980	0.998	1.027	0.966	0.985	0.994
7249.11	0.997	1.002	1.006	1.001	1.000	1.010	1.004	1.001	1.015	1.007	1.002	1.011	1.010	1.008	1.010	1.014	1.004	1.005	1.002	0.996	1.002	1.008	1.002	1.003	0.999	1.005	1.005	1.014	1.006	1.002	1.001	1.002	1.005	1.003	1.005	0.970	0.981	1.031	1.007	0.980	1.002	1.024	0.970	0.983	0.997
7251.75	0.998	1.005	1.007	1.003	1.002	1.011	1.007	1.003	1.017	1.006	1.004	1.009	1.011	1.011	1.012	1.017	1.006	1.007	1.004	0.999	1.005	1.012	1.004	1.006	1.002	1.008	1.008	1.016	1.007	1.004	1.007	1.005	1.007	1.005	1.006	0.964	0.981	1.033	1.013	0.981	1.004	1.021	0.973	0.982	1.000
7254.42	1.002	1.008	1.009	1.006	1.004	1.014	1.009	1.006	1.019	1.007	1.003	1.009	1.014	1.013	1.014	1.020	1.010	1.009	1.009	1.001	1.007	1.014	1.008	1.008	1.005	1.011	1.010	1.018	1.010	1.007	1.007	1.009	1.010	1.009	1.010	0.956	0.978	1.034	1.017	0.982	1.006	1.018	0.979	0.984	1.003
7257.11	1.004	1.010	1.011	1.008	1.006	1.016	1.012	1.009	1.021	1.009	1.005	1.011	1.015	1.016	1.017	1.021	1.012	1.012	1.011	1.003	1.009	1.018	1.010	1.010	1.007	1.013	1.013	1.020	1.013	1.009	1.008	1.011	1.013	1.012	1.013	0.953	0.977	1.033	1.019	0.985	1.005	1.015	0.984	0.988	1.007
7259.83	1.007	1.012	1.012	1.010	1.008	1.018	1.014	1.011	1.023	1.009	1.004	1.011	1.015	1.019	1.019	1.024	1.015	1.014	1.013	1.007	1.011	1.019	1.013	1.013	1.011	1.017	1.015	1.021	1.015	1.010	1.010	1.015	1.017	1.014	1.014	0.963	0.980	1.031	1.017	0.989	1.006	1.013	0.990	0.994	1.010
7262.58	1.010	1.014	1.013	1.013	1.009	1.020	1.015	1.014	1.024	1.007	1.003	1.009	1.016	1.019	1.021	1.023	1.018	1.018	1.016	1.009	1.014	1.021	1.015	1.014	1.013	1.019	1.018	1.023	1.017	1.012	1.010	1.017	1.019	1.017	1.018	0.974	0.985	1.027	1.016	0.995	1.005	1.012	0.995	1.001	1.013
7265.36	1.012	1.015	1.016	1.013	1.010	1.019	1.017	1.015	1.024	1.009	1.003	1.010	1.016	1.020	1.022	1.024	1.020	1.020	1.018	1.011	1.016	1.020	1.015	1.016	1.015	1.021	1.020	1.022	1.019	1.013	1.013	1.020	1.020	1.019	1.018	0.983	0.988	1.023	1.015	1.000	1.005	1.010	1.001	1.007	1.016
7268.16	1.015	1.016	1.015	1.014	1.014	1.019	1.018	1.017	1.023	1.009	1.004	1.008	1.016	1.021	1.022	1.023	1.023	1.023	1.020	1.013	1.017	1.020	1.015	1.017	1.018	1.024	1.022	1.022	1.020	1.014	1.013	1.022	1.021	1.021	1.021	0.995	0.992	1.020	1.012	1.005	1.005	1.008	1.006	1.011	1.019
7270.99	1.015	1.016	1.013	1.013	1.015	1.017	1.017	1.017	1.021	1.009	1.002	1.008	1.015	1.018	1.022	1.022	1.024	1.023	1.021	1.014	1.019	1.020	1.015	1.016	1.019	1.024	1.023	1.021	1.021	1.015	1.014	1.023	1.021	1.023	1.019	1.014	0.999	1.016	1.009	1.009	1.005	1.006	1.010	1.013	1.022
7273.85	1.016	1.015	1.014	1.014	1.016	1.016	1.017	1.018	1.021	1.005	1.003	1.003	1.015	1.017	1.020	1.021	1.025	1.025	1.022	1.015	1.020	1.018	1.014	1.016	1.020	1.025	1.023	1.020	1.022	1.015	1.015	1.023	1.021	1.022	1.020	1.031	1.006	1.011	1.006	1.013	1.006	1.005	1.012	1.015	1.023
7276.74	1.017	1.015	1.013	1.013	1.015	1.014	1.017	1.018	1.019	1.004	1.001	1.008	1.014	1.016	1.020	1.020	1.025	1.025	1.022	1.015	1.020	1.017	1.013	1.016	1.020	1.025	1.024	1.019	1.022	1.013	1.014	1.021	1.021	1.023	1.019	1.040	1.009	1.006	1.004	1.016	1.007	1.004	1.013	1.019	1.024
7279.65	1.017	1.013	1.012	1.013	1.015	1.013	1.016	1.018	1.017	1.002	1.000	1.005	1.012	1.015	1.019	1.019	1.025	1.024	1.021	1.016	1.019	1.016	1.012	1.016	1.020	1.024	1.023	1.018	1.021	1.013	1.014	1.022	1.020	1.022	1.019	1.050	1.013	1.001	1.002	1.018	1.008	1.002	1.014	1.022	1.024
7282.59	1.017	1.012	1.011	1.011	1.014	1.013	1.016	1.017	1.016	1.005	1.000	1.004	1.010	1.014	1.016	1.016	1.023	1.024	1.020	1.015	1.019	1.014	1.010	1.014	1.019	1.023	1.022	1.016	1.021	1.013	1.015	1.020	1.018	1.023	1.019	1.066	1.018	0.995	1.001	1.017	1.009	1.000	1.012	1.024	1.023
7285.56	1.015	1.011	1.009	1.009	1.014	1.010	1.015	1.015	1.013	1.004	1.001	1.001	1.009	1.011	1.014	1.014	1.022	1.022	1.019	1.014	1.017	1.011	1.009	1.013	1.018	1.022	1.021	1.014	1.018	1.010	1.014	1.017	1.016	1.020	1.015	1.078	1.023	0.989	0.999	1.013	1.009	0.999	1.010	1.024	1.021
7288.56	1.015	1.008	1.009	1.007	1.012	1.009	1.012	1.014	1.011	1.000	1.000	1.003	1.008	1.010	1.012	1.012	1.020	1.020	1.016	1.013	1.017	1.009	1.007	1.012	1.016	1.019	1.019	1.011	1.017	1.009	1.013	1.013	1.013	1.016	1.015	1.079	1.025	0.986	0.997	1.009	1.008	0.997	1.007	1.022	1.018
7291.58	1.009	1.008	1.007	1.005	1.008	1.005	1.010	1.011	1.010	1.001	1.001	1.003	1.007	1.007	1.011	1.009	1.018	1.017	1.015	1.001	1.012	1.007	1.005	1.009	1.013	1.017	1.016	1.009	1.015	1.009	1.012	1.014	1.010	1.016	1.014	1.060	1.022	0.985	0.995	1.005	1.008	0.995	1.004	1.019	1.016
7294.63	1.008	1.006	1.003	1.005	1.006	1.004	1.006	1.008	1.007	0.999	0.998	1.001	1.004	1.004	1.007	1.007	1.014	1.015	1.012	1.005	1.010	1.005	1.002	1.007	1.009	1.013	1.014	1.007	1.011	1.006	1.006	1.011	1.007	1.010	1.010	1.027	1.013	0.987	0.994	0.999	1.007	0.993	0.999	1.016	1.013
7297.71	1.006	1.003	1.002	1.003	1.005	1.002	1.004	1.006	1.006	0.997	0.999	1.001	1.002	1.003	1.005	1.006	1.011	1.012	1.008	1.006	1.008	1.002	0.999	1.005	1.007	1.010	1.010	1.006	1.010	1.004	1.005	1.008	1.004	1.008	1.006	0.993	1.003	0.990	0.993	0.995	1.003	0.991	0.996	1.012	1.008
7300.81	1.003	1.000	1.000	1.000	1.002	1.001	1.002	1.002	1.003	0.998	0.998	1.001	0.999	1.000	1.003	1.003	1.008	1.008	1.005	1.002	1.004	1.000	0.999	1.002	1.004	1.008	1.008	1.003	1.006	1.002	1.002	1.006	1.001	1.006	1.004	0.967	0.994	0.993	0.992	0.992	1.001	0.990	0.993	1.008	1.005
7303.94	1.000	0.999	0.998	0.999	0.999	0.999	1.000	1.001	1.002	0.996	0.997	1.000	1.000	0.999	1.001	1.001	1.006	1.007	1.002	1.001	1.003	0.999	0.997	1.000	1.001	1.006	1.006	1.002	1.004	1.001	1.001	1.004	1.000	1.003	1.003	0.947	0.988	0.995	0.993	0.990	0.998	0.991	0.990	1.002	1.001
7307.1	0.999	0.997	0.997	0.999	0.998	0.998	0.999	0.999	1.000	0.996	1.000	1.002	0.998	0.997	0.999	1.000	1.003	1.004	1.000	0.999	1.000	0.997	0.995	0.998	1.000	1.003	1.003	1.001	1.002	0.999	1.004	1.002	0.999	0.999	1.001	0.937	0.985	0.998	0.993	0.988	0.994	0.993	0.989	0.997	0.998
7310.29	0.998	0.997	0.998	0.997	0.998	0.997	0.997	0.998	1.000	0.995	0.998	0.999	0.997	0.997	0.999	0.999	1.002	1.002	0.998	0.998	0.999	0.997	0.994	0.997	0.998	1.001	1.002	1.000	1.001	1.000	1.000	1.002	0.997	0.997	0.998	0.934	0.984	1.000	0.994	0.986	0.992	0.994	0.989	0.991	0.995
7313.51	0.997	0.996	0.996	0.998	0.997	0.996	0.997	0.997	0.999	0.997	0.998	0.999	0.997	0.997	0.997	0.999	1.000	1.002	0.996	0.998	0.998	0.996	0.994	0.996	0.997	1.001	1.001	1.000	0.999	1.000	0.999	1.002	0.995	0.995	0.997	0.936	0.985	1.003	0.995	0.986	0.991	0.997	0.989	0.987	0.993
7316.75	0.997	0.995	0.997	0.998	0.995	0.997	0.997	0.996	0.999	0.996	0.999	1.003	0.998	0.996	0.998	1.000	0.999	1.001	0.996	0.997	0.998	0.996	0.994	0.996	0.997	1.000	1.001	0.999	0.998	0.999	0.996	1.001	0.997	0.994	0.994	0.936	0.986	1.006	0.997	0.986	0.990	0.999	0.991	0.982	0.991
7320.02	0.997	0.996	0.998	1.000	0.995	0.998	0.997	0.996	1.000	0.995	1.000	1.000	0.998	0.997	0.999	1.000	1.000	1.001	0.995	0.997	0.996	0.997	0.995	0.996	0.997	1.000	1.000	1.000	0.998	0.997	1.000	1.002	0.996	0.994	0.996	0.935	0.986	1.008	0.998	0.986	0.989	1.001	0.993	0.979	0.990
7323.31	0.997	0.997	0.998	0.999	0.994	0.999	0.997	0.995	1.000	0.996	1.003	1.001	0.998	0.998	0.999	1.001	0.999	1.000	0.995	0.998	0.996	0.997	0.996	0.996	0.997	1.000	1.000	1.001	0.997	0.996	0.999	1.003	0.997	0.993	0.995	0.935	0.987	1.010	1.000	0.988	0.988	1.003	0.996	0.979	0.989
7326.64	0.997	0.996	0.998	1.000	0.993	0.998	0.997	0.995	1.001	0.994	1.001	0.999	1.000	0.998	0.999	1.002	0.998	1.000	0.995	0.999	0.996	0.999	0.997	0.996	0.996	0.999	1.001	1.002	0.998	0.996	1.000	0.997	0.997	0.994	0.994	0.935	0.987	1.011	1.003	0.992	0.988	1.004	0.997	0.983	0.990
7329.99	0.997	0.997	0.998	1.000	0.993	0.999	0.998	0.996	1.001	0.994	0.999	1.000	1.000	0.999	1.000	1.002	0.999	1.001	0.996	0.998	0.996	0.999	0.997	0.997	0.997	1.000	1.000	1.003	0.998	0.997	0.998	0.995	0.997	0.995	0.995	0.932	0.988	1.011	1.004	0.996	0.988	1.005	0.998	0.989	0.991
7333.37	0.998	0.997	0.998	1.001	0.994	1.000	0.998	0.997	1.002	0.993	1.003	0.999	1.001	1.000	1.001	1.002	1.000	1.001	0.996	0.999	0.997	0.999	0.998	0.997	0.997	1.000	1.000	1.002	0.998	0.994	0.997	0.995	0.998	0.995	0.994	0.925	0.986	1.010	1.005	1.000	0.989	1.006	0.999	0.996	0.993
7336.77	0.998	0.998	0.998	1.000	0.993	1.000	0.999	0.997	1.001	0.994	1.003	0.998	1.001	1.000	1.000	1.002	1.000	1.001	0.996	0.999	0.997	0.999	0.999	0.998	0.998	1.000	1.000	1.003	0.999	0.997	0.998	0.996	0.997	0.995	0.994	0.920	0.985	1.007	1.006	1.003	0.991	1.007	1.000	1.002	0.994
7340.21	0.999	0.998	0.997	1.000	0.994	1.000	0.999	0.998	1.002	0.994	0.999	0.998	1.001	1.000	1.001	1.003	1.001	1.002	0.998	0.998	0.997	0.999	0.999	0.998	0.998	1.002	1.001	1.002	0.999	0.994	0.996	0.997	0.998	0.995	0.995	0.922	0.985	1.004	1.006	1.005	0.994	1.008	1.001	1.008	0.996
7343.67	0.999	0.998	0.997	1.000	0.994	0.999	0.999	0.998	1.001	0.993	1.003	0.998	1.000	0.999	1.001	1.003	1.001	1.002	0.998	0.999	0.999	1.001	0.999	0.998	0.998	1.001	1.002	0.997	1.000	0.997	0.999	0.995	0.998	0.996	0.995	0.938	0.990	1.002	1.005	1.005	0.996	1.008	1.001	1.011	0.998
7347.15	0.999	0.999	0.998	1.000	0.996	1.000	1.000	1.000	1.002	0.996	1.004	0.997	1.001	0.999	1.000	1.003	1.002	1.003	0.999	0.998	0.999	1.001	0.999	1.000	0.998	1.002	1.003	1.001	1.001	0.998	0.995	0.996	0.997	0.998	0.995	0.959	0.997	1.002	1.004	1.004	0.998	1.008	0.999	1.012	1.000
7350.67	0.999	0.999	0.996	1.000	0.996	0.999	1.000	1.000	1.003	0.996	1.008	0.999	0.999	1.000	1.001	1.003	1.003	1.003	1.000	1.000	0.999	1.000	1.001	1.000	0.999	1.003	1.003	1.003	1.001	0.996	0.996	0.997	0.997	0.997	0.996	0.980	1.005	1.002	1.003	1.002	0.998	1.008	0.998	1.011	1.002
7354.21	0.999	1.000	0.996	1.002	0.997	1.001	1.001	1.000	1.002	0.996	1.003	0.997	1.000	1.000	1.001	1.002	1.003	1.003	1.000	0.999	1.001	1.000	1.000	1.000	0.999	1.003	1.003	1.003	1.001	0.999	0.996	0.996	0.998	0.997	0.997	0.998	1.012	1.002	1.002	1.000	1.000	1.007	0.996	1.009	1.003
7357.78	1.000	1.000	0.997	1.001	0.999	1.001	1.001	1.001	1.003	0.997	0.998	0.998	1.001	1.001	1.001	1.003	1.004	1.004	1.001	0.999	1.001	1.001	1.002	1.001	1.000	1.004	1.004	1.002	1.002	0.999	0.997	0.998	1.000	0.999	0.996	1.014	1.018	1.002	1.002	0.997	1.000	1.006	0.997	1.007	1.004
7361.38	1.001	1.000	0.996	1.001	1.000	1.001	1.001	1.002	1.002	0.995	0.999	0.997	1.001	1.000	1.002	1.003	1.005	1.005	1.002	0.999	1.001	1.001	1.001	1.001	1.001	1.005	1.005	1.003	1.002	0.999	0.997	0.998	0.999	1.001	0.996	1.026	1.023	1.001	1.002	0.996	1.002	1.005	0.995	1.004	1.005
7365	1.001	1.001	0.997	1.001	1.000	1.001	1.003	1.003	1.002	0.997	0.997	1.000	1.000	1.000	1.001	1.002	1.005	1.005	1.002	1.000	1.002	1.001	1.001	1.002	1.002	1.005	1.005	1.003	1.003	0.998	0.997	0.998	0.999	1.002	0.998	1.032	1.025	1.001	1.002	0.995	1.003	1.004	0.996	1.001	1.006
7368.66	1.001	1.001	0.997	1.002	1.001	1.002	1.002	1.002	1.002	0.997	0.999	1.000	0.999	1.000	1.001	1.002	1.005	1.005	1.003	1.001	1.002	1.001	1.002	1.002	1.002	1.006	1.005	1.003	1.004	1.000	1.000	0.999	1.000	1.001	0.998	1.026	1.025	1.001	1.002	0.995	1.004	1.003	0.997	0.998	1.006
7372.34	1.002	1.002	0.997	1.002	1.001	1.002	1.002	1.003	1.002	1.000	0.998	1.001	1.000	1.000	1.002	1.002	1.005	1.005	1.003	1.000	1.002	1.001	1.003	1.003	1.002	1.006	1.005	1.003	1.005	1.001	1.002	0.999	1.000	1.002	0.999	1.008	1.021	1.002	1.002	0.995	1.006	1.002	0.998	0.995	1.006
7376.04	1.002	1.003	0.998	1.002	1.003	1.002	1.004	1.003	1.002	1.001	0.997	1.000	1.001	1.000	1.002	1.003	1.006	1.005	1.003	1.002	1.003	1.002	1.005	1.004	1.003	1.007	1.006	1.003	1.005	1.001	0.999	0.999	1.001	1.003	0.999	0.975	1.013	1.004	1.001	0.997	1.007	1.001	1.001	0.994	1.005
7379.78	1.002	1.003	0.998	1.003	1.003	1.004	1.004	1.003	1.003	1.001	0.999	1.001	1.000	1.002	1.002	1.004	1.006	1.006	1.003	1.001	1.003	1.003	1.004	1.004	1.002	1.006	1.005	1.004	1.005	1.002	1.002	1.000	1.001	1.002	1.000	0.937	1.001	1.005	1.001	0.999	1.007	0.999	1.002	0.993	1.005
7383.54	1.002	1.003	0.998	1.003	1.003	1.003	1.003	1.003	1.003	0.999	0.999	1.001	1.001	1.002	1.003	1.004	1.006	1.006	1.003	1.002	1.003	1.003	1.005	1.004	1.002	1.006	1.005	1.005	1.005	1.001	1.001	1.000	1.002	1.001	0.999	0.909	0.991	1.005	1.000	1.001	1.007	0.998	1.002	0.993	1.005
7387.33	1.002	1.003	0.998	1.002	1.003	1.003	1.004	1.003	1.003	1.002	1.000	1.001	1.001	1.002	1.003	1.003	1.005	1.005	1.003	1.000	1.003	1.004	1.005	1.004	1.002	1.005	1.005	1.005	1.005	1.002	1.002	1.001	1.001	1.002	0.999	0.899	0.986	1.005	1.000	1.003	1.007	0.997	1.004	0.993	1.004
7391.14	1.002	1.002	0.999	1.003	1.003	1.003	1.003	1.002	1.003	1.001	1.001	1.003	1.001	1.002	1.003	1.002	1.005	1.005	1.003	1.002	1.003	1.002	1.006	1.004	1.002	1.005	1.005	1.004	1.005	1.003	1.000	1.000	1.001	1.002	1.000	0.903	0.987	1.004	0.999	1.005	1.007	0.996	1.004	0.993	1.004
7394.99	1.002	1.002	0.999	1.002	1.003	1.002	1.003	1.002	1.001	1.002	1.001	1.001	1.000	1.002	1.002	1.002	1.005	1.004	1.002	1.002	1.003	1.002	1.004	1.003	1.002	1.004	1.004	1.003	1.004	1.002	1.001	1.001	1.001	1.002	0.999	0.911	0.991	1.002	0.999	1.005	1.006	0.994	1.005	0.994	1.003
7398.86	1.002	1.002	0.999	1.002	1.002	1.001	1.002	1.002	1.000	1.003	1.002	1.001	1.000	1.001	1.002	1.001	1.004	1.004	1.001	1.003	1.002	1.001	1.004	1.002	1.001	1.003	1.004	1.002	1.003	1.002	1.001	1.001	1.000	1.000	0.999	0.914	0.993	1.000	0.999	1.006	1.004	0.994	1.005	0.997	1.003
7402.76	1.003	1.001	0.998	1.001	1.003	1.000	1.002	1.001	0.999	1.003	1.000	0.999	0.997	1.000	1.000	1.000	1.003	1.003	1.000	1.005	1.002	1.000	1.003	1.003	1.002	1.003	1.004	1.001	1.002	1.002	1.002	0.998	1.000	0.998	0.998	0.914	0.994	0.998	0.999	1.006	1.004	0.993	1.007	1.000	1.003
7406.68	1.001	1.000	0.997	1.001	1.002	0.999	1.000	1.000	0.997	1.002	1.002	1.000	0.998	0.999	0.999	0.998	1.003	1.002	1.000	1.001	1.000	0.999	1.001	1.000	1.000	1.002	1.002	0.999	1.002	1.003	0.999	1.000	0.998	1.000	0.995	0.914	0.995	0.995	0.999	1.007	1.003	0.994	1.006	1.004	1.002
7410.63	1.000	1.000	0.995	1.000	1.000	0.998	0.999	1.000	0.997	1.000	1.001	0.998	0.998	0.997	0.997	0.997	1.001	1.001	0.999	1.001	1.000	0.997	1.000	0.999	0.999	1.001	1.001	0.998	1.001	1.000	0.998	0.998	0.997	0.999	0.993	0.917	0.996	0.994	0.998	1.007	1.001	0.994	1.006	1.007	1.002
7414.62	1.000	0.998	0.995	1.000	1.000	0.996	0.999	0.999	0.995	1.001	1.000	1.000	0.996	0.996	0.996	0.996	1.001	1.001	0.998	1.001	0.999	0.996	1.000	0.997	0.998	1.000	1.000	0.997	0.999	1.001	0.998	0.998	0.995	0.996	0.994	0.920	0.997	0.993	0.998	1.007	1.000	0.995	1.005	1.009	1.001
7418.62	0.999	0.998	0.995	0.999	1.000	0.996	0.997	0.998	0.995	1.001	1.001	0.999	0.996	0.995	0.995	0.995	1.000	1.000	0.997	0.999	0.998	0.995	0.998	0.997	0.998	1.000	1.000	0.996	0.998	1.000	0.996	0.995	0.995	0.997	0.995	0.923	0.997	0.994	0.998	1.005	0.998	0.996	1.004	1.009	1.000
7422.66	0.999	0.998	0.994	0.999	0.999	0.995	0.997	0.997	0.994	1.000	0.999	0.999	0.996	0.995	0.995	0.996	0.999	1.000	0.997	0.999	0.998	0.995	0.998	0.997	0.998	0.999	0.999	0.996	0.998	0.999	0.995	0.996	0.995	0.995	0.993	0.927	0.996	0.995	0.998	1.003	0.997	0.997	1.001	1.008	1.000
7426.72	0.998	0.997	0.993	0.997	0.999	0.995	0.996	0.997	0.994	0.999	0.999	0.997	0.995	0.995	0.994	0.995	0.999	0.998	0.995	0.998	0.997	0.995	0.997	0.997	0.996	0.997	0.999	0.995	0.998	1.000	0.996	0.995	0.994	0.996	0.991	0.930	0.995	0.996	0.998	1.002	0.997	0.999	1.001	1.006	0.999
7430.81	0.997	0.997	0.992	0.998	0.998	0.995	0.996	0.996	0.994	0.999	1.000	0.996	0.995	0.995	0.993	0.994	0.997	0.998	0.995	0.997	0.997	0.994	0.998	0.996	0.996	0.997	0.998	0.995	0.997	0.999	0.996	0.994	0.993	0.996	0.993	0.933	0.995	0.997	0.999	1.000	0.997	1.000	0.999	1.004	0.999
7434.93	0.997	0.997	0.992	0.997	0.998	0.995	0.995	0.996	0.994	0.998	0.998	0.994	0.994	0.995	0.993	0.995	0.998	0.997	0.994	0.995	0.997	0.994	0.998	0.996	0.996	0.997	0.998	0.995	0.996	0.999	0.996	0.994	0.992	0.995	0.993	0.936	0.996	0.997	0.999	0.998	0.997	1.001	0.998	1.001	0.999
7439.07	0.997	0.997	0.992	0.996	0.998	0.995	0.995	0.997	0.994	0.997	0.997	0.996	0.995	0.994	0.994	0.994	0.997	0.997	0.995	0.997	0.996	0.995	0.997	0.997	0.996	0.996	0.997	0.995	0.996	0.997	0.996	0.994	0.993	0.994	0.992	0.940	0.999	0.998	0.999	0.997	0.997	1.002	0.999	0.998	0.998
7443.24	0.997	0.997	0.993	0.997	0.998	0.995	0.996	0.996	0.994	0.998	0.997	0.995	0.994	0.995	0.993	0.996	0.996	0.997	0.994	0.996	0.996	0.995	0.997	0.997	0.995	0.997	0.997	0.995	0.996	0.996	0.995	0.995	0.993	0.995	0.992	0.943	1.004	0.999	0.999	0.997	0.998	1.002	1.000	0.995	0.997
7447.44	0.997	0.996	0.993	0.997	0.997	0.995	0.995	0.995	0.994	0.997	0.997	0.996	0.997	0.996	0.994	0.995	0.996	0.996	0.994	0.996	0.995	0.996	0.998	0.997	0.996	0.996	0.997	0.996	0.996	0.997	0.994	0.995	0.993	0.995	0.993	0.946	1.009	1.001	0.999	0.997	0.998	1.002	1.000	0.993	0.996
7451.67	0.996	0.996	0.993	0.996	0.997	0.996	0.996	0.996	0.994	0.999	0.998	0.995	0.996	0.995	0.994	0.995	0.996	0.996	0.994	0.995	0.995	0.996	0.998	0.997	0.995	0.996	0.996	0.995	0.996	0.997	0.996	0.996	0.992	0.995	0.994	0.950	1.012	1.002	1.000	0.998	0.999	1.002	1.001	0.992	0.996
7455.92	0.996	0.997	0.993	0.997	0.997	0.997	0.996	0.996	0.995	0.999	0.997	0.997	0.996	0.996	0.995	0.996	0.996	0.997	0.995	0.997	0.994	0.996	1.000	0.996	0.995	0.996	0.996	0.996	0.996	0.997	0.994	0.997	0.995	0.995	0.992	0.953	1.013	1.002	1.000	0.999	1.000	1.002	0.999	0.992	0.997
7460.2	0.996	0.998	0.994	0.997	0.998	0.997	0.996	0.996	0.995	1.000	0.998	0.998	0.997	0.997	0.994	0.996	0.996	0.995	0.995	0.996	0.995	0.995	0.999	0.997	0.995	0.997	0.996	0.996	0.995	0.997	0.996	0.997	0.994	0.996	0.992	0.956	1.013	1.003	1.000	1.000	1.000	1.001	1.000	0.993	0.997
7464.51	0.996	0.998	0.994	0.997	0.998	0.998	0.997	0.996	0.995	1.000	0.999	0.999	0.997	0.998	0.996	0.997	0.996	0.996	0.995	0.998	0.996	0.997	0.999	0.998	0.996	0.997	0.997	0.996	0.997	0.996	0.998	0.998	0.995	0.996	0.993	0.960	1.012	1.003	1.000	1.000	1.001	1.000	0.999	0.995	0.997
7468.85	0.997	0.998	0.995	0.997	0.999	0.998	0.997	0.996	0.996	1.000	0.999	0.998	0.998	0.998	0.996	0.998	0.997	0.997	0.995	0.997	0.995	0.997	1.000	0.997	0.996	0.996	0.996	0.996	0.996	0.997	0.996	0.997	0.994	0.996	0.994	0.963	1.009	1.003	1.001	1.001	1.001	1.000	1.000	0.996	0.998
7473.21	0.997	0.999	0.996	0.997	1.000	0.999	0.997	0.997	0.996	1.002	1.000	1.000	0.997	0.999	0.997	0.998	0.997	0.997	0.995	0.998	0.996	0.997	1.001	0.998	0.997	0.997	0.997	0.996	0.997	0.997	0.995	1.000	0.996	0.997	0.995	0.967	1.005	1.003	1.001	1.001	1.001	1.000	1.000	0.998	0.999
7477.6	0.997	1.000	0.995	0.997	1.001	0.999	0.997	0.998	0.996	1.001	1.000	1.000	0.998	0.999	0.997	0.998	0.997	0.997	0.996	0.999	0.996	0.998	1.000	0.998	0.997	0.998	0.997	0.997	0.998	0.999	0.998	0.997	0.995	0.997	0.995	0.970	1.002	1.002	1.002	1.002	1.001	1.000	1.002	0.999	1.000
7482.02	0.998	0.999	0.995	0.996	1.001	0.998	0.998	0.997	0.996	1.001	1.001	0.998	0.998	0.999	0.997	0.998	0.997	0.997	0.996	0.998	0.996	0.998	1.001	0.998	0.998	0.997	0.997	0.997	0.997	0.998	1.000	0.998	0.996	0.997	0.995	0.974	1.000	1.001	1.002	1.003	1.002	1.000	1.000	1.000	1.000
7486.47	0.998	0.999	0.996	0.997	1.000	0.998	0.998	0.998	0.996	1.001	1.001	1.000	0.999	0.999	0.996	0.997	0.997	0.997	0.997	0.997	0.996	0.998	1.001	0.998	0.997	0.997	0.996	0.996	0.996	0.998	1.000	0.998	0.995	0.999	0.996	0.977	0.997	0.999	1.001	1.003	1.001	1.000	0.998	1.001	1.001
7490.94	0.998	1.000	0.996	0.997	1.001	0.998	0.998	0.999	0.996	1.002	1.000	1.000	0.999	0.999	0.997	0.997	0.998	0.998	0.998	0.998	0.997	0.999	1.001	0.998	0.998	0.997	0.997	0.996	0.997	0.998	1.001	0.998	0.996	0.999	0.996	0.981	0.995	0.998	1.001	1.003	1.001	1.000	1.000	1.001	1.001
7495.44	0.998	0.999	0.996	0.997	1.001	0.998	0.997	0.998	0.995	1.001	1.001	1.000	0.998	0.997	0.996	0.996	0.997	0.997	0.997	0.999	0.997	0.998	1.000	0.998	0.997	0.997	0.998	0.996	0.997	0.999	1.001	0.999	0.997	0.997	0.997	0.984	0.993	0.997	1.000	1.003	1.002	1.000	0.998	1.001	1.002
7499.97	0.999	1.000	0.995	0.998	1.001	0.998	0.997	0.999	0.996	1.003	1.002	0.999	0.998	0.998	0.997	0.997	0.998	0.999	0.998	1.000	0.998	0.998	1.001	0.998	0.998	0.998	0.997	0.997	0.998	0.999	1.000	0.997	0.996	0.999	0.997	0.988	0.994	0.997	1.000	1.003	1.002	1.000	0.999	1.000	1.002
7504.52	0.999	1.000	0.996	0.997	1.001	0.998	0.998	0.999	0.995	1.003	1.002	0.998	0.999	0.998	0.996	0.997	0.998	0.998	0.998	0.998	0.997	0.998	1.000	0.998	0.998	0.998	0.998	0.997	0.998	0.999	1.001	1.000	0.996	0.998	0.996	0.991	0.996	0.997	0.999	1.001	1.002	0.999	0.998	1.000	1.003
7509.1	0.999	1.000	0.996	0.997	1.001	0.998	0.998	0.999	0.995	1.002	1.000	0.999	0.999	0.998	0.997	0.996	0.998	0.998	0.999	0.999	0.997	0.998	1.001	0.998	0.999	0.997	0.998	0.996	0.998	0.999	0.999	0.998	0.997	0.999	0.999	0.995	0.997	0.997	0.999	1.000	1.002	0.999	0.999	1.000	1.002
7513.71	0.999	1.000	0.997	0.999	1.002	0.998	0.998	0.999	0.995	1.002	1.002	0.999	0.999	0.997	0.996	0.996	0.998	0.998	0.999	0.999	0.997	0.998	1.000	0.998	0.998	0.997	0.997	0.996	0.997	0.998	1.000	0.998	0.997	1.000	1.000	0.999	0.997	0.997	0.999	1.000	1.002	0.999	0.998	0.999	1.002
7518.35	0.999	0.999	0.998	0.999	1.002	0.998	0.997	0.999	0.996	1.002	1.000	1.000	0.998	0.998	0.996	0.996	0.998	0.997	0.998	0.998	0.998	0.998	1.000	0.998	0.998	0.997	0.997	0.996	0.997	0.999	1.001	0.999	0.997	1.000	0.998	1.002	0.997	0.997	0.999	1.000	1.001	0.999	0.997	0.999	1.002
7523.02	0.998	1.000	0.997	0.998	1.002	0.998	0.999	0.999	0.995	1.003	1.000	1.001	0.998	0.998	0.996	0.996	0.997	0.998	0.999	0.999	0.998	0.998	0.999	0.998	0.998	0.997	0.997	0.996	0.998	0.999	1.000	0.998	0.997	1.000	0.999	1.006	0.997	0.998	0.999	0.999	1.001	0.999	0.998	0.999	1.002
7527.71	0.999	1.000	0.998	0.998	1.002	0.998	0.998	0.999	0.996	1.003	1.000	1.000	0.999	0.999	0.997	0.996	0.998	0.998	0.998	0.999	0.998	0.998	1.001	0.998	0.999	0.998	0.997	0.996	0.998	1.000	1.000	0.999	0.998	1.000	0.998	1.010	0.998	0.998	0.999	0.999	1.001	0.999	0.997	0.999	1.001
7532.43	0.999	1.000	0.998	0.999	1.001	0.998	0.998	0.999	0.996	1.002	0.998	0.999	0.999	0.999	0.997	0.997	0.997	0.997	0.998	0.999	0.998	0.999	1.000	0.999	0.999	0.997	0.997	0.996	0.998	1.000	1.001	1.000	0.997	1.000	0.997	1.013	0.999	0.999	0.999	0.998	1.001	0.999	0.998	1.000	1.001
7537.17	0.999	1.000	0.999	0.999	1.001	0.998	0.998	0.998	0.997	1.003	1.000	1.001	0.999	0.998	0.996	0.997	0.997	0.997	0.998	0.999	0.999	1.000	1.000	0.998	0.999	0.998	0.997	0.997	0.997	0.998	1.002	1.000	0.998	1.000	0.997	1.017	0.999	0.999	0.999	0.998	1.000	0.999	0.998	1.000	1.000
7541.95	1.000	1.001	0.998	1.001	1.001	0.999	0.998	0.999	0.997	1.003	0.999	0.999	0.998	0.999	0.997	0.997	0.997	0.998	0.999	0.999	0.999	1.000	1.000	0.999	0.999	0.997	0.998	0.998	0.997	1.000	1.000	1.002	0.997	1.000	1.000	1.021	0.999	1.000	0.999	0.999	0.999	1.000	0.998	1.000	1.000
7546.75	0.999	1.000	0.999	1.000	1.001	0.999	0.999	0.999	0.997	1.002	0.997	0.999	1.001	0.998	0.998	0.998	0.997	0.996	0.998	0.999	0.998	0.999	1.000	0.998	0.999	0.997	0.997	0.997	0.997	1.000	1.000	1.001	0.999	0.999	0.999	1.025	0.998	1.000	0.999	0.999	0.999	1.000	0.997	1.000	1.000
7551.58	1.000	1.000	1.000	1.001	1.001	0.999	0.999	0.999	0.997	1.002	1.001	1.000	1.000	1.000	0.997	0.998	0.996	0.996	0.999	1.000	0.997	1.000	1.000	0.999	0.999	0.997	0.997	0.998	0.997	0.999	1.000	1.001	0.998	0.999	0.998	1.029	0.999	1.000	1.000	0.999	0.999	1.001	0.997	1.000	1.001
7556.43	0.999	1.000	0.999	1.000	1.000	0.999	0.999	0.999	0.998	1.001	1.000	0.999	1.000	1.000	0.997	0.997	0.997	0.997	0.999	1.000	0.999	1.000	1.001	0.999	0.999	0.997	0.996	0.997	0.997	0.999	1.000	0.999	0.999	1.000	1.000	1.032	1.000	1.000	1.000	0.999	0.998	1.001	0.996	1.000	1.000
7561.31	0.999	1.000	0.999	1.000	1.000	0.999	0.998	0.999	0.997	1.000	0.998	0.998	1.000	1.000	0.998	0.997	0.996	0.996	0.999	1.001	0.998	0.999	1.001	0.999	0.999	0.997	0.996	0.997	0.997	0.999	1.001	1.001	0.999	1.001	0.998	1.036	1.002	1.000	1.000	0.998	0.997	1.002	0.996	1.000	0.999
7566.23	0.999	0.999	1.000	0.999	1.001	0.999	0.999	0.999	0.997	1.000	0.999	1.001	1.001	0.999	0.997	0.997	0.996	0.996	0.998	1.000	0.998	1.000	1.000	0.998	0.999	0.996	0.995	0.996	0.996	0.998	1.000	1.000	0.998	1.000	1.000	1.040	1.003	1.000	1.000	0.998	0.997	1.002	0.996	1.000	0.999
7571.16	1.000	0.999	1.001	0.998	1.000	0.999	0.998	1.000	0.997	0.999	0.999	1.000	0.999	1.000	0.997	0.997	0.996	0.997	1.000	1.001	0.999	0.999	1.000	0.999	0.999	0.996	0.995	0.997	0.998	1.000	1.000	1.000	0.998	1.000	0.999	1.044	1.003	1.000	1.000	0.998	0.997	1.003	0.994	1.000	0.999
7576.13	1.000	1.000	1.002	1.000	1.002	0.998	1.000	0.999	0.997	1.003	1.004	1.001	1.001	1.000	0.999	0.998	0.996	0.997	0.999	0.998	1.000	0.999	1.000	1.000	1.000	0.996	0.997	0.997	0.998	1.002	0.996	1.002	0.999	0.999	1.002	1.048	1.000	0.999	1.000	0.999	0.997	1.003	0.994	1.000	1.000
7581.12	0.999	0.999	1.001	0.998	1.000	0.998	0.997	0.999	0.996	1.002	1.003	1.001	0.999	0.999	0.998	0.998	0.996	0.996	0.999	1.000	0.998	0.999	0.998	0.999	0.998	0.996	0.995	0.997	0.997	0.999	1.001	0.999	0.999	1.000	0.999	1.052	0.998	0.999	1.000	0.997	0.997	1.004	0.992	1.000	1.000
7586.14	0.999	0.999	1.002	0.998	0.999	0.998	0.998	0.999	0.997	1.001	1.001	1.001	1.000	0.999	0.998	0.997	0.996	0.996	0.999	1.001	0.998	0.999	1.000	0.999	1.000	0.996	0.995	0.996	0.997	0.999	0.997	1.000	1.000	1.000	1.001	1.056	0.995	0.999	1.000	0.997	0.996	1.003	0.993	1.000	1.000
7591.19	0.999	0.999	1.002	0.999	0.999	0.999	0.998	1.000	0.997	1.001	1.002	1.000	0.999	1.000	0.998	0.997	0.996	0.995	0.999	0.999	0.999	0.999	0.999	1.000	1.000	0.996	0.995	0.997	0.998	1.001	1.000	1.002	1.000	1.000	1.001	1.060	0.994	1.000	1.000	0.996	0.996	1.003	0.992	1.000	1.000
7596.26	1.000	0.999	1.002	1.001	1.000	0.999	0.999	0.999	0.997	1.002	1.001	1.002	1.001	1.001	0.998	0.996	0.996	0.995	1.000	1.000	0.999	0.999	0.999	0.999	0.999	0.996	0.995	0.997	0.996	1.001	1.000	0.997	0.999	1.000	1.000	1.064	0.994	1.000	1.000	0.994	0.995	1.004	0.990	1.000	1.000
7601.36	0.999	0.999	1.003	1.000	0.999	1.000	0.999	1.000	0.997	1.002	1.000	1.000	1.000	1.000	0.999	0.997	0.996	0.996	1.000	1.000	0.999	0.999	0.999	1.000	1.000	0.996	0.996	0.998	0.997	1.001	1.000	0.999	1.000	1.000	1.001	1.068	0.994	1.000	1.000	0.994	0.995	1.004	0.992	1.000	1.000
7606.49	1.000	0.999	1.003	1.000	1.000	1.000	1.000	1.000	0.998	1.001	1.002	0.999	1.000	1.001	0.999	0.997	0.996	0.996	1.000	1.001	1.000	0.999	0.999	1.000	1.000	0.996	0.996	0.997	0.998	1.001	1.001	0.999	1.002	1.000	1.001	1.072	0.994	1.000	1.000	0.993	0.994	1.005	0.990	1.000	1.000
7611.65	0.999	0.998	1.003	1.000	0.999	1.001	0.999	1.000	0.998	1.001	0.998	1.001	1.001	1.000	0.998	0.997	0.996	0.996	1.001	1.000	1.001	1.000	0.998	1.000	1.001	0.996	0.996	0.998	0.998	1.001	1.002	0.998	1.001	1.001	1.001	1.076	0.993	1.001	1.000	0.992	0.994	1.005	0.989	1.000	1.000
7616.83	1.000	0.999	1.004	1.000	1.001	1.001	1.000	1.001	0.999	1.000	0.999	1.001	1.001	1.001	1.001	0.998	0.996	0.997	1.001	1.001	1.001	1.000	0.999	1.000	1.001	0.997	0.996	0.998	0.998	1.000	0.999	1.001	1.001	1.002	1.001	1.080	0.992	1.001	1.000	0.991	0.993	1.005	0.987	1.000	0.999
7622.05	1.000	1.000	1.005	1.000	0.999	1.001	1.001	1.001	0.999	0.999	0.997	1.000	1.001	1.001	1.000	0.998	0.996	0.996	1.002	1.001	1.001	1.002	1.000	1.001	1.001	0.996	0.996	0.998	0.998	1.001	1.000	1.001	1.003	1.001	1.003	1.084	0.992	1.001	1.001	0.991	0.993	1.005	0.985	1.001	0.999
7627.28	1.001	1.000	1.005	1.001	1.000	1.001	1.001	1.001	1.000	1.001	1.000	1.002	1.002	1.002	1.000	0.999	0.997	0.997	1.003	1.002	1.002	1.001	1.000	1.001	1.001	0.996	0.996	0.998	0.999	1.001	1.002	0.999	1.003	1.000	1.004	1.088	0.993	1.001	1.000	0.990	0.993	1.006	0.983	1.001	1.000
7632.55	1.001	1.000	1.005	1.001	1.000	1.003	1.003	1.001	1.001	0.998	1.000	1.003	1.001	1.001	1.001	0.999	0.997	0.997	1.002	1.002	1.001	1.002	1.000	1.001	1.002	0.997	0.997	0.999	0.999	1.002	1.002	1.000	1.004	1.000	1.003	1.093	0.992	1.001	0.997	0.989	0.992	1.006	0.981	1.001	1.000
7637.84	1.001	1.001	1.007	1.002	1.000	1.003	1.004	1.001	1.001	0.996	1.001	1.000	1.001	1.003	1.002	0.999	0.997	0.997	1.003	1.003	1.002	1.002	1.000	1.002	1.002	0.997	0.997	1.000	0.998	1.001	1.001	1.001	1.003	1.002	1.003	1.097	0.991	1.002	1.000	0.989	0.992	1.006	0.978	1.001	1.000
7643.16	1.003	1.000	1.007	0.999	0.999	1.004	1.006	1.003	1.002	0.997	0.998	1.000	1.000	1.002	1.002	1.000	0.997	0.997	1.003	1.004	1.004	1.002	1.000	1.003	1.003	0.998	0.998	0.999	1.000	0.999	1.001	1.000	1.004	1.002	1.005	1.101	0.990	1.002	1.001	0.988	0.992	1.006	0.976	1.000	1.000
7648.51	1.004	1.000	1.010	1.001	1.000	1.006	1.006	1.005	1.002	0.997	0.998	0.999	1.004	1.004	0.999	0.998	0.998	0.997	1.001	1.001	1.001	1.000	0.997	1.002	1.000	0.996	0.997	0.995	0.997	0.998	1.011	1.004	1.004	1.000	1.007	1.105	0.988	1.002	1.000	0.988	0.993	1.007	0.974	1.000	1.001
7653.89	1.006	1.001	1.013	1.003	1.003	1.003	1.006	1.003	1.004	0.998	1.001	0.999	1.001	1.006	1.005	1.001	0.996	0.997	1.004	0.999	1.010	1.006	1.003	1.008	1.007	1.000	1.003	1.003	1.004	1.002	1.004	0.999	1.005	1.000	1.009	1.110	0.988	1.001	1.000	0.989	0.991	1.005	0.972	0.999	1.000
7659.29	1.000	1.005	1.011	1.005	0.997	1.002	1.006	1.002	1.002	0.998	1.003	1.003	1.004	1.003	1.005	1.001	0.997	0.997	1.006	0.998	1.005	1.004	1.001	1.002	1.003	0.998	0.999	1.002	1.000	1.003	0.995	1.009	1.007	1.006	1.008	1.114	0.988	1.001	1.001	0.988	0.991	1.004	0.970	1.000	1.001
7664.72	1.002	1.004	1.010	1.004	0.998	1.003	1.006	1.003	1.004	0.998	1.000	1.002	1.004	1.004	1.004	1.000	0.998	0.997	1.005	1.003	1.005	1.005	1.001	1.002	1.004	0.998	0.998	1.001	1.000	1.003	1.000	1.005	1.006	1.005	1.005	1.118	0.988	1.001	1.000	0.986	0.990	1.004	0.968	1.000	1.000
7670.18	1.003	1.004	1.010	1.006	0.998	1.003	1.007	1.003	1.003	0.997	0.999	1.003	1.004	1.005	1.005	1.001	0.999	0.997	1.005	1.004	1.006	1.005	1.000	1.004	1.005	0.998	0.999	1.002	1.000	1.004	1.001	1.005	1.008	1.002	1.006	1.122	0.988	1.001	1.000	0.985	0.990	1.004	0.966	1.000	1.000
