# Supplementary material for: Iron and iron-bound phosphate accumulate in surface soils of ice-wedge polygons in arctic tundra
Source: Royal Society of Chemistry journal article supplement (doi:10.1039/d0em00142b), 2020-01-01
Supplement: d0em00142b4.csv [file d0em00142b4.csv]

wavenumber_A-1	energy_eV	21_BEO_LCR2_O	21_fit	22_BEO_LCR2_M	22_fit	23_BEO_HCT2_O	23_fit	24_BEO_HCT1_M	24_fit	25_BEO_HCC2_O	25_fit	26_BEO_LCC2_O	26_fit	27_BEO_HCC1_M	27_fit	28_BEO_LCT2_O	28_fit	30_BEO_LCT2_M	30_fit	56_BEO_HCC3_00-04	56_fit	57_BEO_HCC3_04-08	57_fit	58_BEO_HCC3_08-12	58_fit	59_BEO_HCC3_12-16	59_fit	60_BEO_HCC3_16-20	60_fit	61_BEO_HCC3_20-24	61_fit	62_BEO_HCC3_24-29	62_fit	63_BEO_LCC1_00-04	63_fit	64_BEO_LCC1_04-08	64_fit	65_BEO_LCC1_08-13	65_fit	69_BEO_LCR3_00-04	69_fit	70_BEO_LCR3_04-08	70_fit	71_BEO_LCR3_08-12	71_fit	72_BEO_LCR3_12-16	72_fit	73_BEO_LCR3_16-19	73_fit
0	7123.74	0	0	0	0	0	0	0	0	0	0	0	0	0	0	0	0	0	0	0	0	0	0	0	0	0	0	0	0	0	0	0	0	0	0	0	0	0	0	0	0	0	0	0	0	0	0	0	0
0.05	7123.75	0	0	0	0	0	0	0	0	0	0	0	0	0	0	0	0	0	0	0	0	0	0	0	0	0	0	0	0	0	0	0	0	0	0	0	0	0	0	0	0	0	0	0	0	0	0	0	0
0.1	7123.78	-0.01	-0.01	0	-0.01	0	-0.01	0	-0.01	0	-0.01	0	-0.01	0	-0.01	-0.01	-0.01	0	-0.01	0	-0.01	0	-0.01	0	-0.01	0	-0.01	0	-0.01	0	-0.01	0	-0.01	0	-0.01	0	-0.01	0	-0.01	0	-0.01	0	-0.01	0	-0.01	0	-0.01	0	-0.01
0.15	7123.82	-0.01	-0.02	-0.01	-0.03	-0.01	-0.02	-0.01	-0.02	0	-0.02	-0.01	-0.02	-0.01	-0.02	-0.01	-0.03	-0.01	-0.03	-0.01	-0.02	0	-0.02	0	-0.02	-0.01	-0.02	-0.01	-0.02	-0.01	-0.02	-0.01	-0.03	-0.01	-0.03	-0.01	-0.03	-0.01	-0.03	-0.01	-0.02	-0.01	-0.03	-0.01	-0.02	-0.01	-0.02	-0.01	-0.03
0.2	7123.89	-0.02	-0.04	-0.02	-0.05	-0.02	-0.04	-0.01	-0.04	0	-0.04	-0.01	-0.04	-0.02	-0.04	-0.02	-0.05	-0.01	-0.05	-0.01	-0.03	-0.01	-0.03	-0.01	-0.03	-0.01	-0.04	-0.02	-0.04	-0.02	-0.04	-0.01	-0.05	-0.01	-0.05	-0.01	-0.04	-0.01	-0.05	-0.02	-0.04	-0.01	-0.05	-0.02	-0.04	-0.02	-0.04	-0.02	-0.05
0.25	7123.98	-0.03	-0.06	-0.03	-0.07	-0.02	-0.06	-0.02	-0.07	0	-0.06	-0.02	-0.07	-0.03	-0.06	-0.03	-0.07	-0.02	-0.07	-0.02	-0.05	-0.01	-0.04	-0.01	-0.05	-0.02	-0.06	-0.02	-0.06	-0.02	-0.07	-0.02	-0.07	-0.02	-0.07	-0.02	-0.07	-0.02	-0.07	-0.03	-0.06	-0.02	-0.07	-0.02	-0.07	-0.03	-0.07	-0.03	-0.07
0.3	7124.08	-0.05	-0.09	-0.04	-0.1	-0.04	-0.08	-0.03	-0.09	0	-0.08	-0.03	-0.09	-0.04	-0.09	-0.05	-0.09	-0.02	-0.1	-0.03	-0.07	-0.02	-0.06	-0.02	-0.07	-0.03	-0.08	-0.03	-0.09	-0.04	-0.09	-0.03	-0.1	-0.03	-0.1	-0.03	-0.09	-0.03	-0.1	-0.05	-0.08	-0.03	-0.09	-0.04	-0.09	-0.04	-0.09	-0.04	-0.09
0.35	7124.2	-0.06	-0.11	-0.05	-0.12	-0.05	-0.1	-0.04	-0.12	-0.01	-0.11	-0.04	-0.12	-0.06	-0.12	-0.06	-0.12	-0.03	-0.13	-0.04	-0.09	-0.03	-0.08	-0.03	-0.1	-0.04	-0.1	-0.05	-0.12	-0.05	-0.12	-0.04	-0.13	-0.04	-0.12	-0.04	-0.12	-0.04	-0.13	-0.06	-0.1	-0.04	-0.12	-0.05	-0.12	-0.05	-0.12	-0.05	-0.12
0.4	7124.35	-0.08	-0.14	-0.07	-0.15	-0.07	-0.13	-0.05	-0.14	-0.01	-0.14	-0.05	-0.15	-0.08	-0.14	-0.08	-0.15	-0.04	-0.16	-0.06	-0.11	-0.04	-0.1	-0.04	-0.12	-0.05	-0.13	-0.06	-0.14	-0.06	-0.15	-0.05	-0.16	-0.06	-0.15	-0.05	-0.15	-0.06	-0.16	-0.08	-0.13	-0.05	-0.15	-0.06	-0.15	-0.07	-0.15	-0.07	-0.15
0.45	7124.51	-0.1	-0.16	-0.09	-0.18	-0.08	-0.15	-0.07	-0.17	-0.02	-0.16	-0.07	-0.18	-0.1	-0.17	-0.1	-0.18	-0.06	-0.19	-0.08	-0.14	-0.06	-0.12	-0.06	-0.14	-0.06	-0.15	-0.08	-0.17	-0.08	-0.18	-0.06	-0.19	-0.07	-0.18	-0.07	-0.18	-0.07	-0.19	-0.1	-0.15	-0.07	-0.18	-0.08	-0.17	-0.09	-0.17	-0.09	-0.18
0.5	7124.69	-0.13	-0.19	-0.11	-0.21	-0.1	-0.18	-0.09	-0.2	-0.03	-0.19	-0.08	-0.21	-0.12	-0.2	-0.13	-0.21	-0.07	-0.22	-0.1	-0.16	-0.07	-0.13	-0.07	-0.17	-0.08	-0.17	-0.1	-0.2	-0.1	-0.2	-0.08	-0.21	-0.09	-0.21	-0.08	-0.2	-0.09	-0.22	-0.13	-0.18	-0.08	-0.21	-0.1	-0.2	-0.11	-0.2	-0.11	-0.21
0.55	7124.89	-0.15	-0.21	-0.13	-0.24	-0.13	-0.2	-0.11	-0.22	-0.04	-0.21	-0.1	-0.24	-0.15	-0.22	-0.16	-0.24	-0.09	-0.25	-0.12	-0.18	-0.09	-0.15	-0.09	-0.19	-0.1	-0.19	-0.12	-0.22	-0.12	-0.23	-0.1	-0.24	-0.11	-0.24	-0.1	-0.23	-0.11	-0.25	-0.16	-0.2	-0.1	-0.24	-0.12	-0.23	-0.13	-0.23	-0.14	-0.24
0.6	7125.11	-0.18	-0.23	-0.15	-0.26	-0.15	-0.22	-0.13	-0.24	-0.05	-0.23	-0.13	-0.26	-0.18	-0.25	-0.19	-0.26	-0.11	-0.27	-0.15	-0.19	-0.12	-0.16	-0.11	-0.2	-0.12	-0.21	-0.15	-0.24	-0.15	-0.25	-0.12	-0.26	-0.12	-0.26	-0.12	-0.25	-0.13	-0.27	-0.18	-0.22	-0.12	-0.26	-0.15	-0.25	-0.15	-0.25	-0.16	-0.26
0.65	7125.35	-0.21	-0.25	-0.18	-0.28	-0.18	-0.23	-0.15	-0.26	-0.07	-0.25	-0.15	-0.28	-0.2	-0.26	-0.22	-0.28	-0.12	-0.29	-0.18	-0.21	-0.14	-0.17	-0.14	-0.22	-0.14	-0.23	-0.17	-0.26	-0.17	-0.27	-0.14	-0.28	-0.15	-0.28	-0.14	-0.27	-0.15	-0.29	-0.21	-0.23	-0.14	-0.28	-0.17	-0.27	-0.18	-0.27	-0.19	-0.28
0.7	7125.6	-0.22	-0.26	-0.19	-0.29	-0.19	-0.24	-0.15	-0.27	-0.09	-0.26	-0.15	-0.3	-0.21	-0.28	-0.23	-0.29	-0.12	-0.3	-0.19	-0.21	-0.15	-0.17	-0.15	-0.22	-0.14	-0.23	-0.18	-0.27	-0.18	-0.28	-0.14	-0.29	-0.17	-0.29	-0.16	-0.29	-0.17	-0.31	-0.23	-0.24	-0.17	-0.29	-0.18	-0.28	-0.18	-0.28	-0.2	-0.29
0.75	7125.88	-0.23	-0.27	-0.19	-0.3	-0.2	-0.24	-0.16	-0.27	-0.1	-0.26	-0.15	-0.31	-0.22	-0.29	-0.23	-0.3	-0.12	-0.31	-0.2	-0.21	-0.15	-0.16	-0.15	-0.22	-0.14	-0.23	-0.18	-0.28	-0.18	-0.29	-0.14	-0.3	-0.19	-0.3	-0.19	-0.29	-0.19	-0.32	-0.24	-0.25	-0.18	-0.3	-0.18	-0.29	-0.19	-0.29	-0.2	-0.3
0.8	7126.18	-0.23	-0.27	-0.19	-0.3	-0.2	-0.24	-0.15	-0.27	-0.1	-0.26	-0.14	-0.31	-0.22	-0.29	-0.24	-0.3	-0.11	-0.31	-0.21	-0.2	-0.16	-0.14	-0.15	-0.21	-0.14	-0.23	-0.17	-0.28	-0.18	-0.29	-0.13	-0.3	-0.19	-0.31	-0.2	-0.3	-0.19	-0.32	-0.24	-0.24	-0.18	-0.3	-0.17	-0.29	-0.18	-0.29	-0.2	-0.3
0.85	7126.49	-0.23	-0.26	-0.18	-0.29	-0.2	-0.23	-0.15	-0.26	-0.09	-0.25	-0.13	-0.31	-0.21	-0.28	-0.23	-0.3	-0.1	-0.3	-0.21	-0.19	-0.16	-0.12	-0.15	-0.19	-0.13	-0.21	-0.16	-0.27	-0.17	-0.28	-0.12	-0.29	-0.19	-0.3	-0.19	-0.29	-0.18	-0.32	-0.24	-0.24	-0.18	-0.3	-0.16	-0.29	-0.17	-0.29	-0.2	-0.3
0.9	7126.82	-0.22	-0.24	-0.17	-0.28	-0.19	-0.21	-0.14	-0.25	-0.08	-0.23	-0.11	-0.29	-0.2	-0.27	-0.22	-0.29	-0.08	-0.29	-0.21	-0.16	-0.16	-0.09	-0.15	-0.17	-0.12	-0.19	-0.14	-0.26	-0.15	-0.27	-0.1	-0.28	-0.17	-0.29	-0.18	-0.28	-0.17	-0.3	-0.24	-0.22	-0.17	-0.28	-0.14	-0.27	-0.16	-0.27	-0.18	-0.28
0.95	7127.18	-0.21	-0.22	-0.15	-0.25	-0.18	-0.19	-0.12	-0.22	-0.07	-0.2	-0.09	-0.26	-0.18	-0.25	-0.21	-0.26	-0.06	-0.26	-0.21	-0.13	-0.15	-0.05	-0.14	-0.14	-0.1	-0.16	-0.12	-0.24	-0.13	-0.24	-0.07	-0.25	-0.16	-0.27	-0.17	-0.26	-0.15	-0.28	-0.23	-0.2	-0.15	-0.26	-0.11	-0.25	-0.13	-0.25	-0.17	-0.26
1	7127.55	-0.2	-0.19	-0.13	-0.22	-0.16	-0.16	-0.1	-0.19	-0.06	-0.16	-0.05	-0.22	-0.15	-0.22	-0.19	-0.23	-0.03	-0.23	-0.2	-0.09	-0.14	0	-0.12	-0.1	-0.07	-0.12	-0.08	-0.21	-0.1	-0.21	-0.04	-0.22	-0.14	-0.24	-0.14	-0.23	-0.13	-0.25	-0.21	-0.17	-0.14	-0.23	-0.08	-0.22	-0.1	-0.22	-0.14	-0.23
1.05	7127.94	-0.17	-0.16	-0.1	-0.18	-0.13	-0.12	-0.07	-0.15	-0.04	-0.12	-0.01	-0.17	-0.12	-0.18	-0.16	-0.2	0.01	-0.19	-0.18	-0.05	-0.12	0.05	-0.1	-0.04	-0.04	-0.08	-0.04	-0.17	-0.06	-0.17	0.01	-0.18	-0.12	-0.2	-0.13	-0.19	-0.11	-0.22	-0.19	-0.13	-0.12	-0.2	-0.03	-0.18	-0.05	-0.18	-0.1	-0.19
1.1	7128.35	-0.14	-0.11	-0.06	-0.13	-0.1	-0.06	-0.04	-0.1	-0.02	-0.08	0.04	-0.09	-0.07	-0.13	-0.13	-0.16	0.06	-0.13	-0.16	0	-0.1	0.1	-0.07	0.01	0	-0.02	0.02	-0.11	-0.01	-0.12	0.06	-0.12	-0.1	-0.16	-0.1	-0.15	-0.09	-0.18	-0.16	-0.09	-0.1	-0.15	0.02	-0.12	0	-0.13	-0.06	-0.14
1.15	7128.78	-0.12	-0.07	-0.04	-0.07	-0.07	-0.01	-0.01	-0.03	0.01	-0.03	0.07	-0.01	-0.04	-0.08	-0.1	-0.1	0.08	-0.05	-0.14	0.06	-0.09	0.14	-0.05	0.07	0.03	0.03	0.05	-0.05	0.02	-0.06	0.08	-0.05	-0.07	-0.11	-0.08	-0.1	-0.05	-0.13	-0.13	-0.04	-0.07	-0.1	0.05	-0.06	0.03	-0.07	-0.04	-0.08
1.2	7129.22	-0.09	0	-0.01	0.02	-0.04	0.08	0.01	0.06	0.03	0.03	0.1	0.06	-0.01	0	-0.07	-0.03	0.11	0.05	-0.12	0.13	-0.06	0.2	-0.03	0.16	0.06	0.12	0.09	0.04	0.05	0.03	0.12	0.06	-0.05	-0.05	-0.05	-0.04	-0.03	-0.06	-0.1	0.02	-0.04	-0.03	0.09	0.03	0.07	0.02	0	0
1.25	7129.69	-0.05	0.06	0.02	0.11	0	0.16	0.04	0.15	0.06	0.09	0.14	0.11	0.03	0.08	-0.03	0.04	0.15	0.17	-0.09	0.21	-0.04	0.26	-0.01	0.25	0.09	0.2	0.13	0.14	0.1	0.12	0.16	0.17	-0.02	0.02	-0.02	0.03	0.01	0.01	-0.06	0.09	-0.01	0.04	0.14	0.12	0.11	0.11	0.04	0.09
1.3	7130.18	-0.02	0.12	0.06	0.19	0.03	0.24	0.07	0.23	0.09	0.15	0.17	0.14	0.07	0.15	0.01	0.1	0.17	0.27	-0.06	0.28	-0.01	0.31	0.02	0.33	0.12	0.28	0.17	0.23	0.13	0.2	0.18	0.27	0.01	0.08	0.01	0.09	0.04	0.07	-0.02	0.14	0.02	0.11	0.17	0.21	0.14	0.2	0.07	0.16
1.35	7130.68	0.02	0.16	0.08	0.24	0.06	0.29	0.09	0.28	0.13	0.19	0.18	0.16	0.1	0.21	0.04	0.16	0.19	0.33	-0.03	0.32	0.02	0.33	0.04	0.37	0.14	0.32	0.19	0.29	0.16	0.26	0.2	0.33	0.05	0.13	0.05	0.14	0.08	0.13	0.01	0.19	0.05	0.16	0.2	0.27	0.17	0.26	0.1	0.22
1.4	7131.2	0.05	0.19	0.11	0.27	0.09	0.31	0.11	0.3	0.16	0.23	0.2	0.17	0.14	0.24	0.08	0.2	0.2	0.35	0.01	0.34	0.05	0.33	0.07	0.38	0.16	0.34	0.21	0.32	0.18	0.29	0.21	0.35	0.08	0.18	0.08	0.18	0.11	0.17	0.05	0.21	0.08	0.2	0.22	0.3	0.19	0.29	0.12	0.26
1.45	7131.75	0.08	0.22	0.14	0.28	0.12	0.31	0.14	0.3	0.2	0.25	0.21	0.18	0.17	0.26	0.12	0.22	0.21	0.35	0.05	0.33	0.08	0.32	0.11	0.37	0.18	0.33	0.23	0.32	0.2	0.29	0.22	0.35	0.12	0.21	0.12	0.21	0.15	0.21	0.09	0.23	0.11	0.23	0.23	0.31	0.22	0.3	0.15	0.27
1.5	7132.31	0.12	0.23	0.17	0.28	0.16	0.3	0.16	0.29	0.25	0.27	0.22	0.2	0.2	0.27	0.16	0.25	0.22	0.33	0.09	0.31	0.12	0.3	0.14	0.34	0.2	0.31	0.25	0.31	0.22	0.29	0.22	0.32	0.16	0.24	0.15	0.23	0.19	0.24	0.12	0.23	0.15	0.25	0.25	0.31	0.23	0.3	0.18	0.28
1.55	7132.89	0.16	0.25	0.19	0.29	0.19	0.28	0.18	0.28	0.29	0.29	0.23	0.23	0.22	0.29	0.2	0.28	0.22	0.31	0.14	0.29	0.16	0.28	0.17	0.3	0.21	0.3	0.25	0.3	0.23	0.29	0.23	0.31	0.2	0.27	0.19	0.27	0.23	0.28	0.15	0.24	0.19	0.27	0.26	0.31	0.25	0.3	0.2	0.29
1.6	7133.49	0.19	0.28	0.22	0.3	0.23	0.28	0.19	0.28	0.34	0.31	0.24	0.28	0.25	0.31	0.24	0.31	0.23	0.31	0.2	0.28	0.21	0.26	0.2	0.29	0.22	0.29	0.26	0.31	0.24	0.3	0.23	0.3	0.25	0.31	0.24	0.31	0.27	0.33	0.19	0.26	0.23	0.31	0.27	0.32	0.26	0.32	0.22	0.31
1.65	7134.11	0.23	0.31	0.25	0.33	0.26	0.28	0.21	0.29	0.37	0.34	0.24	0.32	0.27	0.34	0.29	0.35	0.23	0.32	0.25	0.28	0.26	0.24	0.25	0.27	0.24	0.28	0.26	0.32	0.25	0.32	0.22	0.31	0.29	0.36	0.28	0.35	0.3	0.37	0.22	0.28	0.27	0.35	0.27	0.33	0.27	0.33	0.25	0.34
1.7	7134.75	0.27	0.34	0.27	0.36	0.29	0.29	0.23	0.31	0.4	0.37	0.24	0.37	0.3	0.37	0.33	0.4	0.23	0.34	0.31	0.27	0.32	0.22	0.3	0.26	0.25	0.29	0.25	0.33	0.25	0.34	0.21	0.33	0.33	0.41	0.32	0.39	0.34	0.43	0.26	0.31	0.31	0.39	0.26	0.35	0.27	0.36	0.27	0.37
1.75	7135.41	0.31	0.37	0.3	0.38	0.32	0.29	0.25	0.32	0.42	0.39	0.25	0.4	0.33	0.39	0.37	0.43	0.23	0.36	0.38	0.26	0.38	0.2	0.34	0.25	0.27	0.28	0.25	0.35	0.26	0.36	0.2	0.34	0.37	0.45	0.36	0.43	0.38	0.47	0.29	0.32	0.35	0.43	0.26	0.37	0.27	0.38	0.29	0.4
1.8	7136.08	0.35	0.39	0.32	0.4	0.35	0.29	0.27	0.33	0.43	0.4	0.26	0.43	0.35	0.41	0.41	0.46	0.22	0.37	0.44	0.25	0.43	0.18	0.38	0.23	0.29	0.28	0.26	0.36	0.26	0.38	0.2	0.36	0.4	0.48	0.39	0.46	0.4	0.51	0.32	0.34	0.38	0.46	0.26	0.38	0.28	0.39	0.31	0.42
1.85	7136.78	0.37	0.4	0.34	0.42	0.38	0.29	0.28	0.34	0.43	0.41	0.26	0.44	0.37	0.42	0.44	0.48	0.22	0.38	0.5	0.23	0.48	0.16	0.42	0.22	0.31	0.27	0.26	0.36	0.27	0.39	0.19	0.36	0.42	0.5	0.4	0.48	0.42	0.53	0.35	0.34	0.4	0.48	0.26	0.39	0.28	0.4	0.33	0.44
1.9	7137.49	0.39	0.41	0.36	0.42	0.4	0.28	0.29	0.33	0.41	0.41	0.27	0.44	0.38	0.42	0.46	0.49	0.23	0.38	0.54	0.22	0.52	0.14	0.46	0.2	0.33	0.26	0.26	0.35	0.27	0.38	0.19	0.36	0.42	0.51	0.41	0.48	0.42	0.54	0.37	0.34	0.41	0.48	0.26	0.38	0.29	0.39	0.35	0.44
1.95	7138.22	0.4	0.41	0.37	0.41	0.41	0.27	0.3	0.33	0.38	0.41	0.27	0.44	0.39	0.41	0.47	0.48	0.23	0.37	0.57	0.21	0.53	0.14	0.48	0.19	0.34	0.25	0.27	0.34	0.27	0.38	0.19	0.35	0.42	0.51	0.41	0.48	0.42	0.54	0.38	0.34	0.41	0.48	0.27	0.37	0.29	0.38	0.36	0.43
2	7138.98	0.4	0.4	0.37	0.4	0.41	0.27	0.3	0.33	0.35	0.4	0.28	0.45	0.39	0.41	0.46	0.48	0.23	0.36	0.57	0.21	0.52	0.14	0.48	0.19	0.33	0.24	0.27	0.33	0.28	0.37	0.2	0.34	0.4	0.5	0.4	0.48	0.4	0.53	0.38	0.34	0.4	0.47	0.28	0.36	0.3	0.37	0.36	0.42
2.05	7139.75	0.39	0.4	0.37	0.4	0.39	0.27	0.29	0.33	0.32	0.4	0.28	0.46	0.39	0.4	0.45	0.47	0.24	0.36	0.52	0.22	0.49	0.16	0.44	0.2	0.32	0.25	0.28	0.33	0.28	0.37	0.21	0.34	0.39	0.49	0.38	0.47	0.39	0.52	0.37	0.35	0.38	0.46	0.29	0.36	0.31	0.37	0.36	0.42
2.1	7140.54	0.37	0.41	0.36	0.41	0.36	0.29	0.29	0.35	0.28	0.4	0.28	0.49	0.38	0.4	0.43	0.46	0.24	0.37	0.47	0.24	0.42	0.18	0.39	0.22	0.3	0.27	0.28	0.34	0.28	0.38	0.22	0.35	0.37	0.48	0.36	0.47	0.36	0.51	0.35	0.37	0.36	0.46	0.29	0.37	0.31	0.38	0.35	0.42
2.15	7141.35	0.35	0.43	0.35	0.42	0.33	0.33	0.27	0.38	0.24	0.4	0.27	0.51	0.36	0.42	0.4	0.46	0.23	0.39	0.4	0.27	0.33	0.22	0.33	0.26	0.28	0.3	0.27	0.37	0.27	0.4	0.22	0.38	0.34	0.48	0.34	0.47	0.33	0.5	0.34	0.39	0.33	0.46	0.28	0.39	0.3	0.4	0.34	0.43
2.2	7142.18	0.33	0.44	0.3	0.43	0.29	0.36	0.25	0.4	0.2	0.4	0.25	0.51	0.33	0.43	0.36	0.46	0.22	0.41	0.31	0.3	0.26	0.25	0.26	0.29	0.24	0.33	0.26	0.39	0.26	0.41	0.22	0.4	0.32	0.47	0.31	0.46	0.31	0.48	0.32	0.42	0.31	0.46	0.27	0.4	0.28	0.41	0.32	0.44
2.25	7143.03	0.31	0.44	0.25	0.43	0.25	0.39	0.22	0.42	0.16	0.39	0.23	0.48	0.3	0.43	0.33	0.45	0.19	0.41	0.23	0.33	0.19	0.27	0.19	0.32	0.21	0.35	0.24	0.4	0.24	0.42	0.21	0.41	0.29	0.46	0.29	0.45	0.29	0.46	0.29	0.43	0.28	0.45	0.25	0.41	0.26	0.41	0.29	0.43
2.3	7143.89	0.29	0.42	0.22	0.4	0.21	0.38	0.19	0.39	0.11	0.36	0.18	0.42	0.27	0.4	0.29	0.41	0.15	0.37	0.17	0.32	0.12	0.27	0.12	0.31	0.17	0.33	0.22	0.38	0.22	0.39	0.18	0.38	0.25	0.42	0.25	0.42	0.26	0.42	0.28	0.42	0.25	0.41	0.22	0.38	0.23	0.39	0.26	0.4
2.35	7144.78	0.27	0.38	0.17	0.34	0.18	0.34	0.16	0.34	0.04	0.31	0.14	0.32	0.23	0.35	0.24	0.36	0.11	0.3	0.1	0.29	0.05	0.25	0.06	0.27	0.13	0.29	0.19	0.33	0.2	0.34	0.15	0.31	0.22	0.36	0.22	0.37	0.22	0.35	0.26	0.38	0.21	0.36	0.18	0.33	0.2	0.33	0.21	0.34
2.4	7145.68	0.24	0.3	0.14	0.24	0.13	0.26	0.13	0.25	-0.03	0.23	0.08	0.21	0.17	0.27	0.19	0.27	0.06	0.2	0.05	0.22	-0.01	0.19	-0.01	0.19	0.07	0.21	0.14	0.24	0.16	0.25	0.1	0.21	0.17	0.28	0.18	0.29	0.17	0.27	0.25	0.31	0.16	0.27	0.13	0.24	0.15	0.24	0.17	0.25
2.45	7146.61	0.21	0.19	0.1	0.12	0.07	0.14	0.07	0.12	-0.12	0.12	0	0.08	0.11	0.15	0.13	0.16	-0.02	0.07	0.01	0.1	-0.07	0.07	-0.1	0.06	-0.01	0.09	0.07	0.12	0.09	0.12	0.03	0.08	0.12	0.17	0.12	0.17	0.1	0.16	0.22	0.19	0.1	0.16	0.06	0.12	0.07	0.12	0.11	0.13
2.5	7147.55	0.15	0.05	0	-0.03	-0.01	-0.02	0	-0.04	-0.21	-0.02	-0.1	-0.08	0.02	0.01	0.06	0.02	-0.12	-0.09	-0.08	-0.06	-0.17	-0.1	-0.19	-0.1	-0.12	-0.07	-0.03	-0.03	0.01	-0.02	-0.06	-0.08	0.04	0.03	0.05	0.04	0.01	0.03	0.19	0.05	0.03	0.02	-0.04	-0.03	-0.03	-0.02	0.03	-0.01
2.55	7148.51	0.08	-0.1	-0.1	-0.18	-0.1	-0.17	-0.09	-0.19	-0.32	-0.17	-0.22	-0.25	-0.08	-0.13	-0.03	-0.12	-0.23	-0.25	-0.18	-0.22	-0.27	-0.27	-0.29	-0.27	-0.23	-0.23	-0.15	-0.18	-0.1	-0.17	-0.17	-0.24	-0.05	-0.11	-0.04	-0.1	-0.08	-0.11	0.13	-0.11	-0.06	-0.13	-0.16	-0.18	-0.14	-0.17	-0.07	-0.16
2.6	7149.49	0	-0.25	-0.19	-0.33	-0.21	-0.33	-0.18	-0.35	-0.42	-0.33	-0.35	-0.4	-0.2	-0.28	-0.14	-0.27	-0.34	-0.4	-0.29	-0.38	-0.37	-0.44	-0.39	-0.43	-0.34	-0.39	-0.28	-0.34	-0.21	-0.33	-0.28	-0.4	-0.15	-0.26	-0.13	-0.25	-0.19	-0.26	0.04	-0.26	-0.16	-0.28	-0.29	-0.33	-0.26	-0.32	-0.17	-0.31
2.65	7150.49	-0.1	-0.4	-0.29	-0.48	-0.32	-0.47	-0.28	-0.49	-0.54	-0.48	-0.46	-0.54	-0.31	-0.43	-0.25	-0.42	-0.44	-0.55	-0.39	-0.53	-0.46	-0.6	-0.47	-0.58	-0.46	-0.54	-0.41	-0.48	-0.32	-0.47	-0.4	-0.54	-0.27	-0.41	-0.25	-0.4	-0.32	-0.41	-0.06	-0.4	-0.27	-0.43	-0.42	-0.48	-0.38	-0.47	-0.28	-0.46
2.7	7151.51	-0.21	-0.54	-0.41	-0.62	-0.42	-0.6	-0.37	-0.62	-0.64	-0.63	-0.56	-0.66	-0.43	-0.57	-0.37	-0.57	-0.54	-0.68	-0.46	-0.66	-0.55	-0.72	-0.54	-0.71	-0.56	-0.67	-0.51	-0.62	-0.43	-0.61	-0.49	-0.67	-0.39	-0.56	-0.37	-0.55	-0.45	-0.57	-0.16	-0.53	-0.39	-0.57	-0.53	-0.61	-0.5	-0.61	-0.39	-0.6
2.75	7152.55	-0.33	-0.67	-0.5	-0.74	-0.51	-0.71	-0.46	-0.73	-0.74	-0.76	-0.64	-0.77	-0.54	-0.7	-0.49	-0.71	-0.62	-0.79	-0.54	-0.76	-0.63	-0.82	-0.62	-0.8	-0.65	-0.78	-0.61	-0.73	-0.53	-0.73	-0.57	-0.78	-0.51	-0.7	-0.49	-0.69	-0.58	-0.72	-0.28	-0.65	-0.5	-0.71	-0.63	-0.73	-0.6	-0.73	-0.5	-0.73
2.8	7153.61	-0.44	-0.79	-0.59	-0.85	-0.6	-0.8	-0.54	-0.82	-0.84	-0.88	-0.71	-0.87	-0.64	-0.83	-0.61	-0.84	-0.69	-0.88	-0.6	-0.85	-0.67	-0.9	-0.67	-0.88	-0.7	-0.86	-0.69	-0.83	-0.62	-0.84	-0.65	-0.87	-0.64	-0.84	-0.62	-0.83	-0.71	-0.86	-0.39	-0.77	-0.62	-0.84	-0.71	-0.84	-0.69	-0.84	-0.59	-0.85
2.85	7154.68	-0.57	-0.91	-0.67	-0.95	-0.67	-0.88	-0.61	-0.9	-0.91	-0.99	-0.78	-0.95	-0.74	-0.94	-0.73	-0.96	-0.74	-0.95	-0.66	-0.92	-0.7	-0.95	-0.7	-0.93	-0.76	-0.93	-0.77	-0.92	-0.7	-0.93	-0.7	-0.94	-0.76	-0.97	-0.74	-0.95	-0.83	-0.99	-0.49	-0.87	-0.74	-0.96	-0.79	-0.94	-0.76	-0.94	-0.69	-0.95
2.9	7155.78	-0.68	-1.01	-0.74	-1.03	-0.72	-0.95	-0.67	-0.97	-0.97	-1.08	-0.82	-1.03	-0.83	-1.03	-0.83	-1.07	-0.78	-1.01	-0.71	-0.97	-0.75	-0.98	-0.72	-0.96	-0.81	-0.98	-0.82	-0.99	-0.76	-1.01	-0.74	-1	-0.87	-1.08	-0.85	-1.06	-0.94	-1.11	-0.59	-0.96	-0.84	-1.06	-0.84	-1.01	-0.83	-1.02	-0.77	-1.04
2.95	7156.89	-0.77	-1.08	-0.79	-1.08	-0.78	-0.99	-0.71	-1.01	-1.02	-1.14	-0.85	-1.09	-0.9	-1.1	-0.92	-1.15	-0.8	-1.04	-0.75	-0.99	-0.79	-0.98	-0.71	-0.97	-0.83	-1	-0.86	-1.04	-0.81	-1.06	-0.77	-1.02	-0.97	-1.17	-0.94	-1.15	-1.03	-1.19	-0.69	-1.03	-0.93	-1.14	-0.88	-1.06	-0.88	-1.07	-0.83	-1.1
3	7158.03	-0.85	-1.12	-0.84	-1.1	-0.82	-1.01	-0.75	-1.02	-1.06	-1.17	-0.87	-1.11	-0.95	-1.15	-0.99	-1.2	-0.81	-1.05	-0.76	-1.01	-0.79	-0.98	-0.71	-0.97	-0.84	-1.02	-0.89	-1.06	-0.86	-1.09	-0.78	-1.03	-1.04	-1.22	-1.01	-1.19	-1.07	-1.24	-0.77	-1.06	-0.98	-1.18	-0.92	-1.1	-0.91	-1.11	-0.88	-1.14
3.05	7159.18	-0.9	-1.13	-0.87	-1.09	-0.84	-1	-0.78	-1	-1.02	-1.17	-0.87	-1.1	-0.98	-1.15	-1.02	-1.2	-0.8	-1.01	-0.78	-0.99	-0.79	-0.95	-0.74	-0.94	-0.83	-0.99	-0.9	-1.05	-0.87	-1.07	-0.78	-1	-1.07	-1.22	-1.04	-1.2	-1.1	-1.25	-0.84	-1.07	-1.02	-1.18	-0.92	-1.08	-0.92	-1.1	-0.91	-1.13
3.1	7160.35	-0.93	-1.1	-0.87	-1.04	-0.84	-0.97	-0.78	-0.95	-0.97	-1.13	-0.84	-1.05	-0.98	-1.12	-1.03	-1.17	-0.76	-0.94	-0.75	-0.95	-0.77	-0.89	-0.7	-0.88	-0.82	-0.94	-0.87	-1	-0.86	-1.03	-0.76	-0.94	-1.06	-1.19	-1.04	-1.17	-1.09	-1.22	-0.87	-1.04	-1.01	-1.15	-0.9	-1.04	-0.91	-1.06	-0.9	-1.09
3.15	7161.54	-0.92	-1.04	-0.84	-0.95	-0.81	-0.89	-0.75	-0.87	-0.89	-1.04	-0.77	-0.95	-0.94	-1.04	-1	-1.09	-0.69	-0.84	-0.73	-0.87	-0.72	-0.8	-0.65	-0.79	-0.76	-0.85	-0.82	-0.92	-0.83	-0.95	-0.71	-0.84	-1.02	-1.12	-1	-1.1	-1.04	-1.14	-0.88	-0.98	-0.97	-1.07	-0.85	-0.96	-0.87	-0.98	-0.87	-1
3.2	7162.75	-0.89	-0.94	-0.79	-0.83	-0.75	-0.79	-0.69	-0.75	-0.78	-0.93	-0.69	-0.82	-0.88	-0.94	-0.94	-0.98	-0.61	-0.71	-0.7	-0.76	-0.65	-0.68	-0.61	-0.67	-0.68	-0.74	-0.75	-0.81	-0.76	-0.83	-0.63	-0.71	-0.95	-1.01	-0.94	-0.99	-0.96	-1.02	-0.87	-0.89	-0.89	-0.96	-0.78	-0.85	-0.8	-0.87	-0.81	-0.89
3.25	7163.98	-0.82	-0.81	-0.7	-0.69	-0.68	-0.66	-0.62	-0.62	-0.65	-0.77	-0.59	-0.67	-0.79	-0.8	-0.85	-0.84	-0.52	-0.55	-0.64	-0.62	-0.57	-0.53	-0.54	-0.52	-0.59	-0.59	-0.65	-0.67	-0.67	-0.69	-0.54	-0.56	-0.85	-0.86	-0.83	-0.86	-0.83	-0.87	-0.82	-0.77	-0.79	-0.82	-0.69	-0.7	-0.71	-0.72	-0.73	-0.74
3.3	7165.23	-0.72	-0.66	-0.58	-0.53	-0.6	-0.52	-0.53	-0.47	-0.51	-0.6	-0.48	-0.51	-0.68	-0.64	-0.74	-0.67	-0.41	-0.4	-0.54	-0.46	-0.5	-0.36	-0.44	-0.36	-0.46	-0.43	-0.54	-0.52	-0.58	-0.54	-0.44	-0.4	-0.72	-0.7	-0.7	-0.7	-0.7	-0.7	-0.74	-0.63	-0.65	-0.66	-0.57	-0.55	-0.59	-0.57	-0.61	-0.58
3.35	7166.49	-0.61	-0.5	-0.49	-0.37	-0.5	-0.37	-0.43	-0.33	-0.34	-0.41	-0.38	-0.35	-0.55	-0.48	-0.6	-0.5	-0.3	-0.25	-0.44	-0.28	-0.36	-0.17	-0.36	-0.19	-0.33	-0.26	-0.42	-0.37	-0.46	-0.38	-0.34	-0.26	-0.57	-0.53	-0.55	-0.53	-0.53	-0.53	-0.63	-0.48	-0.5	-0.49	-0.45	-0.39	-0.46	-0.41	-0.5	-0.42
3.4	7167.78	-0.48	-0.33	-0.36	-0.23	-0.36	-0.21	-0.3	-0.19	-0.15	-0.22	-0.25	-0.19	-0.41	-0.31	-0.45	-0.33	-0.2	-0.13	-0.34	-0.11	-0.25	0.03	-0.26	-0.03	-0.22	-0.1	-0.31	-0.22	-0.33	-0.23	-0.23	-0.14	-0.4	-0.35	-0.39	-0.35	-0.36	-0.35	-0.51	-0.31	-0.35	-0.32	-0.31	-0.24	-0.33	-0.26	-0.37	-0.26
3.45	7169.09	-0.32	-0.15	-0.22	-0.08	-0.22	-0.07	-0.18	-0.06	0.03	-0.02	-0.12	-0.02	-0.25	-0.15	-0.28	-0.16	-0.09	-0.02	-0.19	0.06	-0.12	0.22	-0.15	0.11	-0.08	0.05	-0.18	-0.09	-0.21	-0.09	-0.12	-0.02	-0.22	-0.17	-0.23	-0.17	-0.19	-0.17	-0.37	-0.14	-0.2	-0.15	-0.18	-0.1	-0.2	-0.11	-0.23	-0.11
3.5	7170.41	-0.17	0.05	-0.06	0.07	-0.07	0.1	-0.04	0.09	0.27	0.18	0.02	0.17	-0.09	0.04	-0.1	0.03	0.05	0.1	-0.01	0.23	0.05	0.41	0	0.26	0.08	0.21	-0.03	0.06	-0.07	0.07	0.01	0.1	-0.03	0.03	-0.05	0.03	0.01	0.03	-0.22	0.06	-0.02	0.04	-0.04	0.06	-0.04	0.05	-0.08	0.05
3.55	7171.75	0	0.26	0.11	0.25	0.12	0.29	0.11	0.26	0.5	0.39	0.19	0.38	0.1	0.24	0.08	0.24	0.22	0.25	0.17	0.42	0.27	0.61	0.19	0.44	0.26	0.39	0.15	0.24	0.11	0.25	0.16	0.25	0.18	0.24	0.16	0.25	0.22	0.24	-0.07	0.27	0.17	0.25	0.15	0.24	0.13	0.24	0.09	0.24
3.6	7173.11	0.18	0.45	0.3	0.43	0.33	0.47	0.28	0.43	0.67	0.59	0.39	0.57	0.3	0.45	0.28	0.45	0.39	0.42	0.36	0.61	0.45	0.78	0.39	0.61	0.45	0.57	0.35	0.43	0.3	0.44	0.34	0.42	0.39	0.45	0.36	0.45	0.43	0.45	0.11	0.45	0.37	0.45	0.35	0.43	0.31	0.44	0.27	0.44
3.65	7174.5	0.35	0.61	0.47	0.59	0.51	0.63	0.44	0.58	0.79	0.75	0.61	0.73	0.5	0.62	0.47	0.62	0.57	0.58	0.57	0.76	0.62	0.9	0.59	0.75	0.63	0.72	0.55	0.6	0.49	0.6	0.52	0.58	0.55	0.62	0.52	0.62	0.58	0.63	0.29	0.6	0.53	0.62	0.57	0.61	0.54	0.61	0.34	0.61
3.7	7175.9	0.47	0.73	0.61	0.73	0.66	0.77	0.56	0.72	0.89	0.86	0.75	0.84	0.65	0.76	0.61	0.75	0.69	0.72	0.74	0.88	0.78	0.99	0.73	0.88	0.76	0.85	0.71	0.75	0.64	0.74	0.65	0.72	0.65	0.75	0.62	0.74	0.68	0.75	0.44	0.72	0.63	0.74	0.72	0.75	0.7	0.76	0.54	0.74
3.75	7177.31	0.55	0.84	0.71	0.85	0.75	0.89	0.64	0.84	0.97	0.95	0.84	0.92	0.75	0.88	0.7	0.86	0.78	0.85	0.82	0.98	0.9	1.05	0.85	0.98	0.85	0.95	0.82	0.88	0.73	0.86	0.75	0.86	0.73	0.85	0.7	0.85	0.76	0.86	0.53	0.83	0.7	0.85	0.82	0.88	0.79	0.88	0.71	0.86
3.8	7178.75	0.61	0.92	0.78	0.93	0.82	0.98	0.69	0.93	1	0.99	0.91	0.96	0.82	0.96	0.77	0.93	0.84	0.94	0.87	1.04	0.95	1.07	0.93	1.04	0.91	1.01	0.89	0.97	0.79	0.95	0.82	0.95	0.8	0.92	0.76	0.92	0.82	0.93	0.59	0.91	0.76	0.93	0.9	0.98	0.87	0.97	0.78	0.94
3.85	7180.21	0.66	0.96	0.83	0.98	0.89	1.03	0.73	0.98	1.01	1.02	0.96	0.97	0.88	1.02	0.81	0.98	0.88	1	0.93	1.06	0.97	1.05	0.98	1.06	0.97	1.04	0.95	1.03	0.86	1	0.88	1	0.84	0.97	0.8	0.97	0.86	0.97	0.64	0.96	0.8	0.97	0.97	1.03	0.94	1.03	0.82	1
3.9	7181.69	0.69	0.99	0.85	1	0.9	1.05	0.75	1	1	1.02	1	0.97	0.92	1.05	0.85	1.01	0.92	1.02	0.91	1.06	0.94	1.02	1.03	1.06	1.01	1.05	0.99	1.06	0.9	1.03	0.91	1.03	0.86	0.99	0.83	0.99	0.87	1	0.67	0.98	0.82	1	0.99	1.06	0.97	1.06	0.86	1.02
3.95	7183.18	0.7	0.99	0.83	1.01	0.89	1.05	0.75	1	0.96	1	1.01	0.96	0.93	1.05	0.87	1.01	0.92	1.03	0.89	1.05	0.94	0.97	0.99	1.04	0.97	1.03	0.99	1.06	0.91	1.03	0.92	1.03	0.87	1	0.84	1	0.89	1.01	0.69	0.98	0.83	1	1.03	1.07	0.98	1.06	0.87	1.03
4	7184.7	0.7	0.99	0.84	1	0.85	1.03	0.75	0.99	0.96	0.99	0.99	0.94	0.93	1.05	0.87	1.01	0.91	1.02	0.84	1.02	0.86	0.93	0.92	1.01	0.94	1.01	0.98	1.05	0.9	1.02	0.9	1.02	0.87	1.01	0.83	1	0.9	1.01	0.69	0.97	0.84	1	1.01	1.06	0.99	1.06	0.87	1.02
4.05	7186.23	0.7	0.98	0.84	0.99	0.82	0.99	0.73	0.96	0.93	0.98	0.96	0.92	0.92	1.03	0.88	1.01	0.9	0.99	0.77	0.97	0.76	0.89	0.83	0.96	0.91	0.97	0.96	1.02	0.88	1	0.87	0.99	0.89	1.01	0.85	1	0.93	1.02	0.67	0.96	0.85	1	0.99	1.03	0.98	1.03	0.86	1.01
4.1	7187.78	0.72	0.95	0.81	0.96	0.78	0.94	0.72	0.92	0.91	0.96	0.92	0.88	0.91	1	0.89	1	0.87	0.95	0.7	0.91	0.69	0.83	0.76	0.9	0.85	0.92	0.95	0.98	0.86	0.97	0.85	0.95	0.91	1	0.86	0.99	0.94	1.02	0.66	0.92	0.85	0.99	0.98	1	0.96	1	0.86	0.99
4.15	7189.35	0.72	0.91	0.78	0.92	0.73	0.87	0.7	0.87	0.88	0.93	0.88	0.83	0.9	0.96	0.87	0.98	0.84	0.91	0.65	0.84	0.63	0.75	0.71	0.82	0.77	0.85	0.9	0.92	0.83	0.92	0.82	0.9	0.9	0.98	0.85	0.97	0.92	1.01	0.66	0.87	0.83	0.96	0.93	0.95	0.93	0.95	0.84	0.95
4.2	7190.95	0.7	0.86	0.73	0.87	0.68	0.78	0.65	0.79	0.82	0.88	0.82	0.77	0.86	0.91	0.84	0.94	0.77	0.83	0.59	0.75	0.58	0.65	0.63	0.72	0.7	0.76	0.83	0.85	0.79	0.86	0.74	0.82	0.87	0.95	0.84	0.93	0.91	0.98	0.65	0.8	0.82	0.93	0.88	0.88	0.87	0.89	0.8	0.9
4.25	7192.55	0.69	0.79	0.71	0.79	0.63	0.68	0.61	0.69	0.75	0.82	0.74	0.69	0.81	0.84	0.81	0.88	0.69	0.73	0.53	0.63	0.49	0.54	0.54	0.6	0.62	0.65	0.75	0.75	0.74	0.77	0.68	0.72	0.83	0.9	0.81	0.88	0.9	0.94	0.61	0.72	0.79	0.87	0.79	0.79	0.82	0.8	0.77	0.83
4.3	7194.18	0.65	0.72	0.67	0.69	0.57	0.56	0.56	0.58	0.7	0.74	0.63	0.6	0.73	0.75	0.77	0.81	0.61	0.61	0.48	0.51	0.4	0.41	0.46	0.46	0.54	0.53	0.66	0.64	0.66	0.67	0.59	0.59	0.77	0.84	0.77	0.81	0.86	0.88	0.58	0.64	0.75	0.8	0.73	0.68	0.74	0.7	0.7	0.74
4.35	7195.83	0.61	0.64	0.59	0.58	0.5	0.45	0.5	0.47	0.64	0.64	0.52	0.5	0.66	0.65	0.71	0.73	0.51	0.48	0.43	0.38	0.33	0.28	0.37	0.32	0.45	0.4	0.56	0.52	0.58	0.56	0.5	0.46	0.74	0.76	0.75	0.74	0.82	0.8	0.55	0.55	0.7	0.71	0.65	0.57	0.63	0.59	0.64	0.63
4.4	7197.5	0.57	0.55	0.52	0.48	0.4	0.33	0.42	0.36	0.54	0.54	0.41	0.39	0.59	0.55	0.64	0.64	0.41	0.36	0.33	0.26	0.29	0.15	0.26	0.18	0.35	0.28	0.47	0.4	0.51	0.45	0.42	0.34	0.68	0.68	0.68	0.65	0.75	0.72	0.5	0.46	0.64	0.62	0.53	0.45	0.54	0.48	0.59	0.53
4.45	7199.18	0.51	0.45	0.41	0.36	0.3	0.21	0.34	0.24	0.41	0.42	0.29	0.28	0.49	0.44	0.56	0.53	0.29	0.23	0.16	0.13	0.2	0.02	0.12	0.04	0.23	0.15	0.34	0.28	0.4	0.33	0.29	0.21	0.58	0.57	0.59	0.55	0.65	0.61	0.45	0.36	0.56	0.51	0.41	0.33	0.45	0.36	0.48	0.42
4.5	7200.89	0.44	0.33	0.27	0.23	0.2	0.09	0.25	0.12	0.27	0.28	0.17	0.15	0.37	0.31	0.45	0.4	0.17	0.09	0.06	0	0.08	-0.11	0	-0.09	0.1	0.01	0.22	0.15	0.29	0.2	0.17	0.08	0.47	0.44	0.49	0.42	0.52	0.47	0.38	0.25	0.45	0.38	0.27	0.2	0.29	0.22	0.38	0.28
4.55	7202.61	0.35	0.2	0.16	0.09	0.07	-0.03	0.16	-0.01	0.15	0.14	0.03	0.03	0.25	0.17	0.35	0.25	0.05	-0.05	-0.04	-0.13	-0.08	-0.24	-0.14	-0.22	-0.03	-0.12	0.09	0.01	0.15	0.06	0.04	-0.06	0.36	0.29	0.38	0.27	0.38	0.32	0.3	0.13	0.33	0.24	0.1	0.06	0.15	0.08	0.25	0.14
4.6	7204.36	0.25	0.06	0.06	-0.05	-0.06	-0.16	0.06	-0.14	0	-0.01	-0.1	-0.1	0.12	0.02	0.23	0.1	-0.08	-0.18	-0.15	-0.25	-0.21	-0.35	-0.3	-0.34	-0.18	-0.24	-0.05	-0.12	0.02	-0.08	-0.09	-0.19	0.23	0.13	0.25	0.12	0.24	0.15	0.22	0	0.2	0.08	-0.03	-0.09	0	-0.06	0.11	-0.01
4.65	7206.12	0.14	-0.09	-0.07	-0.19	-0.17	-0.27	-0.04	-0.26	-0.17	-0.17	-0.22	-0.22	-0.02	-0.14	0.09	-0.07	-0.2	-0.31	-0.33	-0.36	-0.33	-0.44	-0.45	-0.44	-0.32	-0.35	-0.19	-0.25	-0.09	-0.21	-0.2	-0.31	0.07	-0.04	0.11	-0.05	0.07	-0.03	0.13	-0.13	0.06	-0.08	-0.15	-0.23	-0.15	-0.21	-0.03	-0.16
4.7	7207.9	0.03	-0.23	-0.22	-0.33	-0.27	-0.37	-0.15	-0.36	-0.35	-0.33	-0.34	-0.34	-0.16	-0.28	-0.06	-0.24	-0.31	-0.42	-0.51	-0.45	-0.48	-0.53	-0.54	-0.52	-0.43	-0.45	-0.31	-0.37	-0.21	-0.34	-0.31	-0.42	-0.07	-0.21	-0.05	-0.21	-0.1	-0.21	0.04	-0.25	-0.08	-0.24	-0.3	-0.35	-0.27	-0.34	-0.17	-0.3
4.75	7209.7	-0.08	-0.36	-0.33	-0.44	-0.39	-0.46	-0.24	-0.45	-0.51	-0.47	-0.48	-0.45	-0.29	-0.42	-0.2	-0.39	-0.42	-0.52	-0.59	-0.54	-0.6	-0.6	-0.63	-0.59	-0.55	-0.54	-0.42	-0.47	-0.32	-0.45	-0.41	-0.51	-0.21	-0.37	-0.2	-0.37	-0.27	-0.38	-0.05	-0.36	-0.23	-0.39	-0.43	-0.47	-0.38	-0.46	-0.3	-0.44
4.8	7211.52	-0.21	-0.47	-0.44	-0.54	-0.51	-0.53	-0.32	-0.52	-0.6	-0.6	-0.56	-0.53	-0.42	-0.53	-0.34	-0.52	-0.5	-0.59	-0.7	-0.61	-0.66	-0.66	-0.69	-0.64	-0.65	-0.61	-0.51	-0.56	-0.44	-0.54	-0.5	-0.58	-0.35	-0.51	-0.33	-0.5	-0.41	-0.53	-0.16	-0.45	-0.38	-0.52	-0.54	-0.57	-0.51	-0.56	-0.42	-0.55
4.85	7213.36	-0.3	-0.55	-0.52	-0.61	-0.57	-0.58	-0.39	-0.57	-0.71	-0.69	-0.6	-0.57	-0.52	-0.62	-0.45	-0.63	-0.57	-0.64	-0.75	-0.66	-0.74	-0.7	-0.76	-0.67	-0.71	-0.66	-0.58	-0.62	-0.52	-0.61	-0.55	-0.62	-0.45	-0.62	-0.45	-0.61	-0.53	-0.65	-0.25	-0.52	-0.48	-0.62	-0.64	-0.64	-0.61	-0.64	-0.49	-0.63
4.9	7215.21	-0.39	-0.61	-0.59	-0.66	-0.6	-0.6	-0.44	-0.59	-0.77	-0.77	-0.65	-0.6	-0.6	-0.69	-0.55	-0.7	-0.62	-0.66	-0.77	-0.68	-0.75	-0.71	-0.77	-0.68	-0.7	-0.68	-0.64	-0.65	-0.57	-0.65	-0.6	-0.64	-0.57	-0.71	-0.53	-0.69	-0.64	-0.74	-0.31	-0.56	-0.56	-0.69	-0.7	-0.68	-0.67	-0.69	-0.57	-0.69
4.95	7217.09	-0.46	-0.66	-0.63	-0.69	-0.61	-0.62	-0.48	-0.6	-0.77	-0.81	-0.68	-0.61	-0.66	-0.74	-0.62	-0.76	-0.64	-0.67	-0.74	-0.69	-0.68	-0.7	-0.71	-0.67	-0.67	-0.68	-0.68	-0.68	-0.6	-0.68	-0.63	-0.65	-0.64	-0.77	-0.6	-0.74	-0.72	-0.81	-0.36	-0.59	-0.63	-0.74	-0.71	-0.72	-0.72	-0.72	-0.63	-0.73
5	7218.99	-0.5	-0.67	-0.63	-0.7	-0.59	-0.62	-0.48	-0.59	-0.76	-0.83	-0.68	-0.62	-0.69	-0.76	-0.67	-0.79	-0.66	-0.67	-0.66	-0.68	-0.58	-0.67	-0.64	-0.65	-0.65	-0.67	-0.68	-0.69	-0.63	-0.69	-0.63	-0.65	-0.7	-0.8	-0.66	-0.77	-0.77	-0.85	-0.43	-0.59	-0.68	-0.77	-0.72	-0.73	-0.74	-0.74	-0.67	-0.75
5.05	7220.9	-0.54	-0.68	-0.66	-0.71	-0.54	-0.62	-0.49	-0.6	-0.76	-0.83	-0.66	-0.63	-0.7	-0.78	-0.7	-0.81	-0.66	-0.68	-0.6	-0.66	-0.49	-0.63	-0.54	-0.64	-0.57	-0.66	-0.64	-0.7	-0.64	-0.7	-0.62	-0.66	-0.74	-0.82	-0.7	-0.79	-0.79	-0.87	-0.45	-0.59	-0.71	-0.78	-0.72	-0.75	-0.7	-0.76	-0.67	-0.76
5.1	7222.83	-0.57	-0.68	-0.62	-0.71	-0.51	-0.62	-0.46	-0.6	-0.72	-0.81	-0.66	-0.66	-0.7	-0.78	-0.71	-0.81	-0.63	-0.68	-0.46	-0.64	-0.34	-0.58	-0.41	-0.61	-0.53	-0.65	-0.65	-0.71	-0.64	-0.7	-0.62	-0.66	-0.75	-0.82	-0.71	-0.79	-0.79	-0.87	-0.43	-0.59	-0.7	-0.79	-0.7	-0.75	-0.7	-0.76	-0.68	-0.76
5.15	7224.79	-0.58	-0.67	-0.6	-0.71	-0.48	-0.62	-0.46	-0.6	-0.71	-0.78	-0.66	-0.69	-0.7	-0.78	-0.72	-0.8	-0.63	-0.69	-0.4	-0.62	-0.27	-0.52	-0.35	-0.59	-0.49	-0.63	-0.67	-0.71	-0.63	-0.7	-0.61	-0.67	-0.74	-0.81	-0.71	-0.78	-0.8	-0.86	-0.44	-0.59	-0.69	-0.78	-0.69	-0.76	-0.68	-0.76	-0.68	-0.76
5.2	7226.76	-0.57	-0.66	-0.6	-0.7	-0.46	-0.62	-0.49	-0.61	-0.7	-0.74	-0.66	-0.73	-0.69	-0.77	-0.72	-0.79	-0.64	-0.7	-0.35	-0.6	-0.22	-0.47	-0.32	-0.57	-0.46	-0.61	-0.67	-0.71	-0.64	-0.71	-0.62	-0.68	-0.73	-0.79	-0.71	-0.76	-0.78	-0.84	-0.46	-0.58	-0.7	-0.76	-0.7	-0.76	-0.68	-0.76	-0.67	-0.76
5.25	7228.75	-0.55	-0.66	-0.58	-0.7	-0.44	-0.62	-0.49	-0.62	-0.64	-0.7	-0.64	-0.75	-0.69	-0.76	-0.71	-0.77	-0.64	-0.7	-0.27	-0.58	-0.16	-0.43	-0.27	-0.56	-0.44	-0.6	-0.67	-0.72	-0.65	-0.7	-0.66	-0.68	-0.72	-0.77	-0.68	-0.74	-0.74	-0.81	-0.45	-0.59	-0.67	-0.75	-0.71	-0.75	-0.69	-0.76	-0.67	-0.75
5.3	7230.76	-0.54	-0.66	-0.54	-0.69	-0.42	-0.62	-0.48	-0.63	-0.56	-0.66	-0.62	-0.76	-0.67	-0.74	-0.69	-0.74	-0.65	-0.69	-0.17	-0.56	-0.08	-0.4	-0.17	-0.54	-0.42	-0.58	-0.67	-0.7	-0.65	-0.7	-0.65	-0.68	-0.68	-0.75	-0.65	-0.73	-0.71	-0.78	-0.45	-0.6	-0.63	-0.73	-0.69	-0.74	-0.67	-0.74	-0.67	-0.73
5.35	7232.79	-0.52	-0.66	-0.51	-0.67	-0.36	-0.61	-0.48	-0.63	-0.54	-0.61	-0.6	-0.75	-0.63	-0.71	-0.63	-0.72	-0.6	-0.67	-0.06	-0.53	0.06	-0.36	-0.02	-0.51	-0.39	-0.55	-0.61	-0.68	-0.62	-0.68	-0.64	-0.66	-0.62	-0.72	-0.62	-0.71	-0.68	-0.74	-0.45	-0.62	-0.59	-0.71	-0.65	-0.7	-0.63	-0.7	-0.62	-0.7
5.4	7234.84	-0.49	-0.66	-0.5	-0.64	-0.33	-0.59	-0.46	-0.61	-0.47	-0.56	-0.56	-0.72	-0.59	-0.67	-0.59	-0.68	-0.56	-0.62	-0.01	-0.48	0.1	-0.33	-0.01	-0.46	-0.33	-0.51	-0.59	-0.63	-0.58	-0.64	-0.57	-0.61	-0.58	-0.69	-0.59	-0.68	-0.63	-0.7	-0.45	-0.63	-0.55	-0.68	-0.63	-0.65	-0.6	-0.65	-0.57	-0.66
5.45	7236.9	-0.48	-0.64	-0.47	-0.59	-0.29	-0.55	-0.44	-0.58	-0.42	-0.5	-0.47	-0.64	-0.53	-0.6	-0.52	-0.63	-0.48	-0.54	0.03	-0.43	0.15	-0.3	0.03	-0.39	-0.25	-0.45	-0.54	-0.56	-0.51	-0.58	-0.48	-0.54	-0.55	-0.64	-0.55	-0.64	-0.55	-0.63	-0.44	-0.64	-0.5	-0.62	-0.54	-0.57	-0.53	-0.58	-0.51	-0.59
5.5	7238.99	-0.45	-0.6	-0.38	-0.5	-0.24	-0.47	-0.4	-0.5	-0.35	-0.42	-0.37	-0.52	-0.46	-0.51	-0.45	-0.55	-0.36	-0.42	0.05	-0.34	0.21	-0.24	0.09	-0.29	-0.17	-0.35	-0.45	-0.45	-0.42	-0.49	-0.39	-0.43	-0.48	-0.57	-0.49	-0.58	-0.48	-0.55	-0.43	-0.61	-0.45	-0.55	-0.43	-0.45	-0.43	-0.46	-0.42	-0.5
5.55	7241.09	-0.39	-0.54	-0.27	-0.38	-0.18	-0.36	-0.31	-0.4	-0.28	-0.32	-0.25	-0.38	-0.35	-0.39	-0.39	-0.45	-0.22	-0.26	0.07	-0.22	0.2	-0.16	0.11	-0.15	-0.12	-0.23	-0.31	-0.31	-0.33	-0.36	-0.27	-0.27	-0.43	-0.48	-0.44	-0.5	-0.43	-0.45	-0.41	-0.56	-0.39	-0.46	-0.32	-0.3	-0.31	-0.32	-0.33	-0.38
5.6	7243.22	-0.36	-0.46	-0.21	-0.26	-0.11	-0.23	-0.22	-0.27	-0.26	-0.22	-0.12	-0.22	-0.25	-0.27	-0.3	-0.35	-0.12	-0.09	0.08	-0.09	0.11	-0.08	0.09	-0.01	-0.07	-0.09	-0.16	-0.16	-0.24	-0.23	-0.13	-0.11	-0.36	-0.39	-0.39	-0.41	-0.38	-0.35	-0.38	-0.49	-0.34	-0.36	-0.2	-0.15	-0.17	-0.17	-0.24	-0.25
5.65	7245.36	-0.32	-0.37	-0.17	-0.14	-0.13	-0.11	-0.16	-0.15	-0.18	-0.12	-0.03	-0.06	-0.19	-0.15	-0.26	-0.25	-0.02	0.05	0.08	0.02	0.09	0.01	0.11	0.12	-0.02	0.03	-0.08	-0.02	-0.15	-0.1	-0.02	0.03	-0.29	-0.29	-0.33	-0.32	-0.31	-0.25	-0.36	-0.4	-0.27	-0.26	-0.1	-0.01	-0.1	-0.04	-0.13	-0.13
5.7	7247.52	-0.29	-0.29	-0.14	-0.05	-0.07	-0.02	-0.12	-0.06	-0.11	-0.05	0.06	0.07	-0.12	-0.06	-0.19	-0.16	0.06	0.15	0.07	0.1	0	0.07	0.13	0.21	0.03	0.11	-0.03	0.07	-0.07	-0.01	0.05	0.13	-0.26	-0.21	-0.26	-0.24	-0.24	-0.17	-0.31	-0.31	-0.21	-0.17	-0.03	0.08	-0.04	0.05	-0.08	-0.04
5.75	7249.7	-0.26	-0.2	-0.06	0.02	-0.02	0.05	-0.08	0.01	-0.06	0.01	0.11	0.16	-0.04	0.01	-0.14	-0.09	0.13	0.21	0.06	0.15	0.01	0.12	0.12	0.25	0.06	0.16	0.04	0.13	0	0.05	0.12	0.19	-0.2	-0.13	-0.21	-0.15	-0.18	-0.09	-0.24	-0.23	-0.13	-0.1	0.08	0.14	0.03	0.12	-0.01	0.03
5.8	7251.9	-0.19	-0.11	0.04	0.08	0.02	0.11	0	0.07	0	0.07	0.18	0.26	0.03	0.08	-0.07	-0.01	0.19	0.24	0.08	0.2	0.04	0.15	0.1	0.28	0.12	0.2	0.12	0.19	0.08	0.11	0.2	0.23	-0.11	-0.05	-0.13	-0.07	-0.06	-0.02	-0.17	-0.13	-0.07	-0.02	0.17	0.19	0.12	0.17	0.05	0.09
5.85	7254.12	-0.1	0	0.12	0.16	0.09	0.18	0.08	0.16	0.08	0.14	0.26	0.33	0.1	0.15	0.02	0.08	0.26	0.3	0.13	0.25	0.04	0.2	0.14	0.31	0.21	0.26	0.2	0.25	0.15	0.19	0.28	0.28	-0.04	0.05	-0.06	0.04	0.03	0.08	-0.11	-0.01	-0.01	0.08	0.24	0.25	0.21	0.23	0.11	0.17
5.9	7256.36	-0.03	0.1	0.19	0.24	0.16	0.24	0.14	0.23	0.15	0.21	0.33	0.41	0.2	0.22	0.1	0.17	0.33	0.35	0.2	0.29	0.08	0.24	0.2	0.34	0.24	0.3	0.3	0.3	0.25	0.25	0.35	0.33	0.04	0.14	0.01	0.13	0.09	0.16	-0.06	0.09	0.05	0.16	0.36	0.3	0.27	0.29	0.18	0.24
5.95	7258.62	0.06	0.21	0.27	0.31	0.21	0.32	0.18	0.31	0.17	0.27	0.4	0.47	0.27	0.3	0.18	0.26	0.39	0.4	0.2	0.34	0.05	0.3	0.21	0.38	0.25	0.35	0.42	0.36	0.33	0.33	0.43	0.39	0.14	0.24	0.11	0.23	0.18	0.25	0.06	0.2	0.14	0.26	0.42	0.36	0.37	0.35	0.26	0.31
6	7260.9	0.16	0.35	0.33	0.41	0.23	0.41	0.27	0.42	0.22	0.37	0.47	0.52	0.33	0.39	0.26	0.37	0.45	0.47	0.16	0.4	0.03	0.37	0.17	0.43	0.29	0.42	0.45	0.43	0.38	0.42	0.45	0.46	0.24	0.36	0.23	0.36	0.28	0.37	0.13	0.35	0.23	0.37	0.47	0.43	0.44	0.42	0.33	0.41
6.05	7263.19	0.24	0.45	0.38	0.49	0.31	0.47	0.33	0.49	0.31	0.44	0.47	0.57	0.39	0.46	0.33	0.46	0.47	0.51	0.19	0.44	0.04	0.42	0.18	0.46	0.34	0.46	0.48	0.48	0.45	0.48	0.47	0.51	0.3	0.46	0.31	0.45	0.36	0.46	0.21	0.46	0.31	0.46	0.48	0.48	0.48	0.47	0.37	0.48
6.1	7265.51	0.32	0.54	0.42	0.54	0.37	0.51	0.36	0.54	0.4	0.49	0.47	0.6	0.44	0.51	0.39	0.53	0.47	0.53	0.26	0.47	0.06	0.46	0.19	0.47	0.36	0.49	0.52	0.51	0.49	0.52	0.48	0.53	0.42	0.53	0.41	0.54	0.44	0.53	0.3	0.54	0.37	0.54	0.49	0.51	0.5	0.51	0.42	0.53
6.15	7267.84	0.4	0.62	0.44	0.59	0.35	0.55	0.38	0.59	0.45	0.55	0.48	0.63	0.47	0.56	0.43	0.6	0.46	0.55	0.3	0.49	0.06	0.48	0.15	0.48	0.36	0.51	0.53	0.54	0.5	0.57	0.46	0.55	0.48	0.61	0.46	0.62	0.48	0.61	0.36	0.63	0.42	0.61	0.53	0.54	0.51	0.54	0.45	0.58
6.2	7270.19	0.42	0.68	0.46	0.62	0.32	0.56	0.34	0.61	0.49	0.59	0.45	0.65	0.46	0.6	0.45	0.65	0.43	0.56	0.29	0.49	0.02	0.49	0.13	0.47	0.34	0.51	0.47	0.55	0.51	0.59	0.46	0.56	0.52	0.67	0.49	0.68	0.52	0.67	0.39	0.68	0.48	0.66	0.54	0.55	0.5	0.56	0.45	0.61
6.25	7272.56	0.47	0.72	0.45	0.64	0.35	0.57	0.39	0.62	0.5	0.61	0.43	0.64	0.47	0.63	0.51	0.69	0.42	0.55	0.17	0.49	0.05	0.48	-0.03	0.46	0.34	0.51	0.46	0.56	0.47	0.61	0.44	0.55	0.57	0.71	0.57	0.72	0.57	0.71	0.43	0.72	0.52	0.7	0.48	0.56	0.48	0.58	0.46	0.63
6.3	7274.96	0.52	0.74	0.46	0.64	0.34	0.58	0.38	0.62	0.5	0.62	0.38	0.61	0.48	0.64	0.52	0.71	0.4	0.54	0.15	0.49	0.01	0.48	0.1	0.44	0.34	0.5	0.43	0.56	0.46	0.61	0.43	0.54	0.6	0.74	0.58	0.74	0.6	0.73	0.45	0.74	0.53	0.71	0.46	0.56	0.46	0.58	0.47	0.64
6.35	7277.37	0.54	0.75	0.44	0.63	0.33	0.57	0.37	0.61	0.49	0.62	0.35	0.56	0.48	0.63	0.53	0.71	0.36	0.51	0.11	0.48	-0.03	0.46	0.13	0.42	0.31	0.49	0.42	0.54	0.46	0.6	0.4	0.52	0.63	0.74	0.57	0.74	0.57	0.73	0.47	0.74	0.53	0.71	0.45	0.55	0.43	0.57	0.48	0.63
6.4	7279.79	0.55	0.73	0.4	0.59	0.31	0.54	0.35	0.57	0.5	0.59	0.33	0.47	0.46	0.61	0.53	0.69	0.32	0.46	0.12	0.44	-0.05	0.42	0.06	0.38	0.26	0.45	0.39	0.51	0.43	0.57	0.36	0.47	0.6	0.72	0.59	0.73	0.58	0.71	0.49	0.72	0.55	0.69	0.41	0.52	0.39	0.54	0.48	0.6
6.45	7282.24	0.54	0.67	0.38	0.52	0.27	0.47	0.3	0.5	0.52	0.54	0.3	0.37	0.45	0.56	0.5	0.63	0.26	0.39	0.21	0.38	-0.04	0.35	0.02	0.3	0.21	0.38	0.34	0.44	0.35	0.5	0.3	0.39	0.56	0.66	0.56	0.67	0.56	0.65	0.47	0.66	0.51	0.63	0.34	0.45	0.36	0.48	0.43	0.54
6.5	7284.71	0.49	0.57	0.34	0.43	0.22	0.37	0.23	0.39	0.47	0.45	0.22	0.25	0.43	0.47	0.47	0.54	0.19	0.29	0.17	0.29	0.01	0.26	-0.1	0.21	0.18	0.29	0.28	0.35	0.31	0.4	0.24	0.29	0.52	0.58	0.5	0.58	0.5	0.57	0.44	0.56	0.49	0.54	0.26	0.37	0.33	0.39	0.4	0.45
6.55	7287.19	0.49	0.46	0.25	0.31	0.24	0.27	0.16	0.27	0.34	0.35	0.2	0.13	0.35	0.37	0.44	0.44	0.13	0.18	0.05	0.19	-0.04	0.15	0.01	0.11	0.14	0.18	0.23	0.25	0.22	0.3	0.17	0.18	0.45	0.47	0.44	0.47	0.44	0.47	0.45	0.44	0.49	0.43	0.21	0.27	0.25	0.29	0.38	0.34
6.6	7289.7	0.34	0.32	0.24	0.2	0.21	0.14	0.08	0.14	0.25	0.25	0.08	0.04	0.29	0.27	0.35	0.33	0.1	0.07	0.07	0.08	-0.01	0.02	0.03	0	0.11	0.07	0.15	0.15	0.19	0.19	0.09	0.07	0.4	0.36	0.36	0.35	0.41	0.36	0.08	0.29	0.32	0.31	0.13	0.17	0.17	0.19	0.28	0.23
6.65	7292.22	0.23	0.2	0.2	0.1	0.09	0.04	0.06	0.03	0.22	0.15	0.01	-0.04	0.19	0.17	0.24	0.22	0.04	-0.01	0.06	-0.02	-0.07	-0.09	-0.03	-0.09	0.06	-0.02	0.06	0.06	0.11	0.09	0	-0.01	0.28	0.25	0.29	0.24	0.32	0.26	-0.02	0.15	0.25	0.21	0.05	0.09	0.1	0.1	0.18	0.14
6.7	7294.77	0.19	0.07	0.12	0	-0.01	-0.06	0.04	-0.06	0.18	0.04	-0.02	-0.11	0.07	0.07	0.16	0.11	-0.03	-0.08	-0.02	-0.11	-0.12	-0.18	-0.06	-0.16	-0.02	-0.11	-0.01	-0.02	0.01	0	-0.05	-0.08	0.18	0.13	0.19	0.12	0.19	0.14	0.15	0.02	0.19	0.09	-0.02	0	0	0.02	0.13	0.04
6.75	7297.33	0.11	-0.04	0.03	-0.08	-0.03	-0.13	-0.04	-0.13	0.08	-0.06	-0.09	-0.17	0	-0.03	0.09	0	-0.09	-0.13	-0.05	-0.18	-0.07	-0.26	-0.03	-0.22	-0.1	-0.18	-0.06	-0.1	-0.04	-0.08	-0.08	-0.14	0.08	0.02	0.07	0	0.09	0.03	0.14	-0.08	0.08	-0.01	-0.1	-0.07	-0.09	-0.06	0.06	-0.05
6.8	7299.91	0	-0.15	-0.08	-0.16	-0.11	-0.21	-0.13	-0.21	-0.03	-0.16	-0.13	-0.21	-0.06	-0.12	-0.05	-0.1	-0.17	-0.19	-0.03	-0.25	-0.12	-0.34	-0.03	-0.28	-0.2	-0.24	-0.18	-0.17	-0.14	-0.16	-0.19	-0.2	-0.01	-0.09	-0.02	-0.11	-0.01	-0.07	-0.02	-0.19	-0.02	-0.11	-0.19	-0.15	-0.12	-0.14	-0.07	-0.13
6.85	7302.51	-0.1	-0.23	-0.11	-0.23	-0.16	-0.27	-0.18	-0.27	-0.1	-0.24	-0.19	-0.27	-0.13	-0.2	-0.1	-0.19	-0.21	-0.25	-0.09	-0.3	-0.16	-0.38	-0.07	-0.32	-0.18	-0.3	-0.21	-0.23	-0.2	-0.23	-0.25	-0.25	-0.1	-0.19	-0.08	-0.2	-0.13	-0.18	-0.05	-0.26	-0.08	-0.2	-0.23	-0.22	-0.19	-0.21	-0.12	-0.21
6.9	7305.13	-0.14	-0.31	-0.18	-0.3	-0.21	-0.32	-0.19	-0.32	-0.12	-0.31	-0.23	-0.29	-0.2	-0.28	-0.17	-0.28	-0.27	-0.3	-0.1	-0.35	-0.06	-0.41	-0.01	-0.36	-0.22	-0.34	-0.25	-0.3	-0.26	-0.3	-0.31	-0.31	-0.2	-0.27	-0.18	-0.28	-0.2	-0.26	-0.12	-0.33	-0.17	-0.28	-0.29	-0.28	-0.27	-0.28	-0.18	-0.28
6.95	7307.77	-0.18	-0.35	-0.23	-0.34	-0.2	-0.35	-0.23	-0.35	-0.13	-0.36	-0.27	-0.32	-0.26	-0.33	-0.21	-0.34	-0.3	-0.34	-0.11	-0.37	-0.05	-0.41	-0.03	-0.37	-0.27	-0.36	-0.29	-0.33	-0.29	-0.34	-0.34	-0.34	-0.25	-0.34	-0.24	-0.34	-0.25	-0.33	-0.17	-0.36	-0.23	-0.34	-0.32	-0.33	-0.33	-0.33	-0.25	-0.34
7	7310.43	-0.22	-0.37	-0.25	-0.36	-0.19	-0.35	-0.25	-0.36	-0.18	-0.38	-0.3	-0.32	-0.3	-0.36	-0.25	-0.37	-0.31	-0.35	-0.08	-0.36	-0.12	-0.38	-0.12	-0.36	-0.29	-0.36	-0.29	-0.35	-0.32	-0.36	-0.34	-0.35	-0.3	-0.38	-0.27	-0.38	-0.34	-0.38	-0.19	-0.37	-0.26	-0.37	-0.33	-0.35	-0.34	-0.35	-0.29	-0.36
7.05	7313.1	-0.25	-0.37	-0.27	-0.36	-0.22	-0.32	-0.21	-0.33	-0.26	-0.39	-0.32	-0.32	-0.3	-0.36	-0.29	-0.39	-0.32	-0.34	-0.02	-0.33	-0.12	-0.33	-0.09	-0.31	-0.27	-0.33	-0.28	-0.34	-0.38	-0.35	-0.32	-0.33	-0.35	-0.4	-0.3	-0.39	-0.38	-0.4	-0.18	-0.35	-0.26	-0.39	-0.36	-0.35	-0.33	-0.35	-0.32	-0.37
7.1	7315.8	-0.28	-0.35	-0.31	-0.34	-0.2	-0.28	-0.21	-0.29	-0.27	-0.37	-0.31	-0.29	-0.31	-0.35	-0.31	-0.39	-0.3	-0.31	-0.07	-0.27	-0.05	-0.26	0.08	-0.26	-0.22	-0.28	-0.3	-0.31	-0.32	-0.32	-0.29	-0.3	-0.36	-0.4	-0.31	-0.39	-0.38	-0.42	-0.25	-0.31	-0.29	-0.38	-0.33	-0.33	-0.35	-0.33	-0.34	-0.35
7.15	7318.51	-0.26	-0.31	-0.28	-0.3	-0.14	-0.23	-0.15	-0.24	-0.27	-0.35	-0.27	-0.26	-0.27	-0.33	-0.31	-0.38	-0.26	-0.27	-0.11	-0.21	-0.02	-0.18	-0.01	-0.19	-0.21	-0.23	-0.27	-0.27	-0.27	-0.29	-0.25	-0.25	-0.33	-0.39	-0.32	-0.37	-0.4	-0.42	-0.25	-0.26	-0.35	-0.36	-0.3	-0.3	-0.32	-0.31	-0.32	-0.33
7.2	7321.25	-0.25	-0.27	-0.24	-0.27	-0.12	-0.17	-0.14	-0.18	-0.29	-0.32	-0.21	-0.22	-0.28	-0.31	-0.34	-0.36	-0.25	-0.23	-0.09	-0.15	0.08	-0.1	0.01	-0.12	-0.2	-0.17	-0.22	-0.23	-0.25	-0.25	-0.22	-0.21	-0.36	-0.38	-0.36	-0.35	-0.43	-0.41	-0.19	-0.2	-0.34	-0.34	-0.27	-0.27	-0.29	-0.28	-0.3	-0.31
7.25	7324	-0.26	-0.21	-0.24	-0.22	-0.12	-0.11	-0.14	-0.12	-0.34	-0.28	-0.2	-0.19	-0.3	-0.27	-0.36	-0.32	-0.22	-0.18	-0.13	-0.09	0.1	-0.02	-0.01	-0.06	-0.14	-0.11	-0.18	-0.19	-0.23	-0.21	-0.19	-0.16	-0.39	-0.34	-0.33	-0.31	-0.4	-0.38	-0.13	-0.13	-0.34	-0.3	-0.2	-0.23	-0.24	-0.24	-0.31	-0.27
7.3	7326.77	-0.26	-0.15	-0.23	-0.17	-0.1	-0.06	-0.12	-0.07	-0.37	-0.23	-0.2	-0.14	-0.29	-0.23	-0.35	-0.27	-0.17	-0.14	-0.17	-0.04	0	0.04	-0.06	-0.01	-0.08	-0.06	-0.17	-0.14	-0.2	-0.16	-0.14	-0.11	-0.38	-0.29	-0.29	-0.25	-0.36	-0.33	-0.12	-0.07	-0.33	-0.25	-0.14	-0.19	-0.21	-0.2	-0.3	-0.22
7.35	7329.56	-0.23	-0.09	-0.19	-0.12	-0.09	-0.01	-0.08	-0.01	-0.3	-0.17	-0.15	-0.1	-0.24	-0.17	-0.3	-0.21	-0.14	-0.09	-0.15	0.01	-0.02	0.1	-0.03	0.04	-0.06	-0.01	-0.14	-0.1	-0.16	-0.1	-0.1	-0.06	-0.34	-0.23	-0.27	-0.19	-0.33	-0.27	-0.15	-0.01	-0.31	-0.19	-0.14	-0.14	-0.21	-0.15	-0.24	-0.16
7.4	7332.37	-0.19	-0.05	-0.21	-0.08	-0.06	0.02	-0.06	0.02	-0.33	-0.13	-0.12	-0.08	-0.21	-0.13	-0.26	-0.17	-0.08	-0.06	-0.21	0.04	0.15	0.14	-0.07	0.07	-0.01	0.02	-0.08	-0.07	-0.09	-0.07	-0.08	-0.03	-0.31	-0.18	-0.25	-0.15	-0.32	-0.22	-0.11	0.03	-0.29	-0.15	-0.12	-0.11	-0.14	-0.12	-0.23	-0.13
7.45	7335.2	-0.18	-0.03	-0.17	-0.06	-0.06	0.04	-0.09	0.03	-0.31	-0.1	-0.08	-0.08	-0.19	-0.11	-0.28	-0.14	-0.1	-0.04	-0.2	0.06	0.19	0.15	-0.1	0.08	0.02	0.04	-0.04	-0.04	-0.14	-0.05	-0.07	-0.02	-0.29	-0.15	-0.22	-0.12	-0.28	-0.19	-0.09	0.04	-0.27	-0.12	-0.13	-0.08	-0.11	-0.09	-0.22	-0.1
7.5	7338.05	-0.16	-0.01	-0.15	-0.04	-0.1	0.05	-0.08	0.04	-0.29	-0.06	-0.05	-0.09	-0.17	-0.08	-0.23	-0.1	-0.07	-0.03	-0.17	0.08	0.02	0.16	-0.1	0.09	0.02	0.06	-0.05	-0.03	-0.11	-0.03	-0.03	-0.01	-0.2	-0.11	-0.19	-0.09	-0.22	-0.15	-0.14	0.05	-0.25	-0.09	-0.11	-0.06	-0.1	-0.07	-0.19	-0.07
7.55	7340.92	-0.14	0	-0.13	-0.02	-0.1	0.05	-0.09	0.03	-0.27	-0.02	-0.07	-0.09	-0.15	-0.05	-0.18	-0.07	-0.06	-0.02	-0.19	0.08	0.03	0.16	-0.08	0.09	-0.01	0.06	-0.09	-0.01	-0.07	-0.02	-0.02	0	-0.19	-0.07	-0.18	-0.05	-0.2	-0.1	-0.15	0.05	-0.18	-0.06	-0.05	-0.04	-0.11	-0.04	-0.18	-0.05
7.6	7343.8	-0.13	-0.02	-0.11	-0.03	-0.05	0.01	-0.09	0	-0.16	-0.01	-0.1	-0.09	-0.12	-0.04	-0.14	-0.06	-0.06	-0.03	-0.18	0.05	0.19	0.12	-0.1	0.06	-0.02	0.04	-0.11	-0.03	-0.07	-0.03	-0.01	-0.02	-0.16	-0.06	-0.15	-0.05	-0.16	-0.07	-0.13	0	-0.14	-0.05	-0.01	-0.04	-0.11	-0.04	-0.17	-0.04
7.65	7346.71	-0.1	-0.04	-0.08	-0.03	-0.03	-0.02	-0.05	-0.02	-0.17	0.02	-0.08	-0.07	-0.08	-0.04	-0.08	-0.04	-0.01	-0.02	-0.08	0.03	0.26	0.1	-0.12	0.04	0.02	0.03	-0.05	-0.03	-0.05	-0.03	0.02	-0.02	-0.1	-0.04	-0.1	-0.04	-0.11	-0.04	-0.15	-0.04	-0.14	-0.04	-0.01	-0.03	-0.08	-0.03	-0.08	-0.03
7.7	7349.63	-0.1	-0.06	-0.08	-0.02	-0.1	-0.05	-0.06	-0.04	-0.13	0.03	-0.08	-0.04	-0.07	-0.03	-0.05	-0.02	0.04	0	-0.07	0.01	0.48	0.06	-0.02	0.03	-0.04	0.01	0	-0.03	-0.01	-0.03	0.03	-0.01	-0.05	-0.02	-0.06	-0.03	-0.05	-0.01	-0.05	-0.08	-0.1	-0.02	0	-0.02	0	-0.02	-0.07	-0.02
7.75	7352.57	-0.1	-0.08	-0.02	-0.01	-0.11	-0.06	0.01	-0.05	-0.04	0.04	0.01	-0.03	-0.03	-0.02	-0.04	-0.01	0.03	0.02	-0.08	0	0.27	0.04	-0.1	0.03	-0.02	0.01	-0.01	-0.02	-0.01	-0.02	0.01	0.01	-0.04	-0.01	-0.06	-0.03	0.01	0.01	-0.08	-0.12	0.03	-0.02	-0.01	0	-0.01	0	-0.03	0
7.8	7355.54	-0.07	-0.08	-0.01	0	-0.03	-0.07	0.04	-0.05	0.03	0.06	0.04	0.01	0.01	-0.01	0.01	0.01	0.06	0.05	-0.05	-0.01	-0.03	0.02	-0.1	0.02	0.05	0.01	0.03	-0.01	-0.01	-0.01	0.04	0.03	0.01	0.01	-0.03	-0.02	0.07	0.04	-0.07	-0.13	0.05	0	0.03	0.02	0.04	0.02	0.02	0.02
7.85	7358.52	-0.02	-0.09	0.01	0.01	-0.01	-0.08	0.01	-0.06	0.04	0.07	0.05	0.02	0.03	0.01	0.08	0.03	0.08	0.06	-0.08	-0.02	-0.1	-0.01	-0.09	0.01	0.1	0	0.05	0	0.04	0	0.08	0.03	0.1	0.03	0.04	0	0.13	0.07	-0.06	-0.15	0.06	0.02	0.08	0.03	0.07	0.03	0.03	0.03
7.9	7361.52	0.03	-0.08	0.06	0.02	-0.03	-0.08	0	-0.06	0.05	0.09	0.06	0.04	0.06	0.02	0.13	0.05	0.09	0.06	-0.1	-0.02	-0.09	-0.03	-0.05	0	0.09	0	0.05	0.01	0.08	0.01	0.08	0.03	0.14	0.05	0.09	0.02	0.15	0.1	-0.06	-0.15	0.07	0.04	0.08	0.04	0.05	0.04	0.05	0.04
7.95	7364.54	0.05	-0.06	0.11	0.03	0.01	-0.07	0.03	-0.06	0.1	0.09	0.06	0.05	0.13	0.04	0.15	0.06	0.11	0.06	-0.01	-0.02	-0.19	-0.04	0.09	0	0.03	0	0.05	0.02	0.06	0.01	0.07	0.03	0.15	0.07	0.12	0.03	0.17	0.11	-0.01	-0.13	0.09	0.05	0.07	0.05	0.06	0.05	0.12	0.05
8	7367.58	0.05	-0.05	0.1	0.03	0	-0.06	0.11	-0.06	0.13	0.1	0.1	0.07	0.13	0.05	0.14	0.07	0.09	0.05	-0.03	-0.02	-0.08	-0.04	0.08	-0.01	0.03	0	0.06	0.02	0.1	0.02	0.07	0.03	0.17	0.07	0.14	0.04	0.22	0.12	0.05	-0.12	0.11	0.06	0.09	0.06	0.11	0.06	0.12	0.06
8.05	7370.63	0.12	-0.04	0.13	0.03	0.03	-0.04	0.1	-0.05	0.18	0.1	0.17	0.11	0.14	0.07	0.21	0.08	0.14	0.05	0.12	0	-0.11	-0.04	0.15	0	0.05	0.01	0.09	0.04	0.14	0.03	0.05	0.03	0.19	0.08	0.15	0.05	0.27	0.12	0.04	-0.1	0.14	0.06	0.11	0.07	0.15	0.08	0.18	0.07
8.1	7373.71	0.14	0	0.19	0.06	0.07	0	0.12	-0.01	0.25	0.11	0.16	0.16	0.22	0.1	0.22	0.1	0.15	0.08	0.19	0.03	-0.16	-0.02	0.14	0.03	0.11	0.04	0.08	0.07	0.15	0.06	0.11	0.06	0.22	0.1	0.18	0.08	0.26	0.14	0.1	-0.05	0.18	0.09	0.17	0.11	0.24	0.11	0.22	0.09
8.15	7376.81	0.15	0.03	0.22	0.08	0.12	0.04	0.16	0.02	0.28	0.11	0.21	0.2	0.29	0.12	0.23	0.11	0.2	0.1	0.22	0.05	-0.1	-0.01	0.12	0.05	0.13	0.06	0.15	0.1	0.18	0.08	0.2	0.08	0.26	0.11	0.22	0.09	0.29	0.14	0.13	-0.02	0.2	0.1	0.24	0.13	0.26	0.13	0.25	0.11
8.2	7379.92	0.17	0.07	0.22	0.11	0.15	0.09	0.19	0.07	0.24	0.13	0.3	0.22	0.28	0.15	0.25	0.14	0.27	0.13	0.19	0.09	0	0.01	0.14	0.08	0.12	0.09	0.25	0.14	0.23	0.12	0.25	0.12	0.27	0.14	0.25	0.12	0.28	0.16	0.15	0.03	0.24	0.13	0.27	0.16	0.26	0.16	0.26	0.14
8.25	7383.05	0.17	0.11	0.23	0.14	0.15	0.13	0.19	0.11	0.25	0.14	0.29	0.23	0.24	0.18	0.26	0.17	0.28	0.15	0.07	0.11	0	0.03	0.14	0.1	0.17	0.11	0.26	0.17	0.26	0.15	0.27	0.15	0.26	0.17	0.25	0.15	0.3	0.18	0.18	0.09	0.27	0.16	0.28	0.19	0.31	0.18	0.26	0.17
8.3	7386.21	0.17	0.16	0.22	0.17	0.17	0.16	0.17	0.14	0.26	0.15	0.26	0.26	0.27	0.2	0.26	0.19	0.28	0.17	0.23	0.13	0.04	0.05	0.15	0.12	0.2	0.13	0.25	0.19	0.32	0.18	0.25	0.17	0.26	0.19	0.24	0.18	0.33	0.2	0.08	0.14	0.27	0.18	0.35	0.2	0.3	0.2	0.32	0.19
8.35	7389.38	0.19	0.2	0.23	0.19	0.24	0.19	0.24	0.17	0.25	0.16	0.31	0.25	0.27	0.22	0.23	0.21	0.3	0.18	0.2	0.15	0.1	0.07	0.28	0.13	0.21	0.15	0.24	0.2	0.31	0.2	0.23	0.18	0.26	0.21	0.23	0.21	0.29	0.21	0.15	0.19	0.25	0.2	0.3	0.21	0.36	0.21	0.31	0.2
8.4	7392.57	0.19	0.22	0.2	0.18	0.24	0.2	0.22	0.18	0.25	0.15	0.28	0.21	0.25	0.21	0.21	0.2	0.25	0.16	0.23	0.15	0.11	0.07	0.24	0.12	0.19	0.14	0.26	0.2	0.29	0.19	0.19	0.16	0.25	0.2	0.23	0.21	0.26	0.2	0.19	0.22	0.27	0.2	0.28	0.2	0.31	0.2	0.26	0.19
8.45	7395.78	0.17	0.25	0.19	0.18	0.24	0.2	0.18	0.19	0.23	0.14	0.22	0.18	0.23	0.21	0.22	0.21	0.19	0.14	0.3	0.14	0.16	0.08	0.18	0.11	0.19	0.13	0.24	0.19	0.28	0.19	0.18	0.15	0.25	0.21	0.21	0.22	0.25	0.2	0.24	0.26	0.22	0.21	0.25	0.18	0.26	0.19	0.2	0.19
8.5	7399.01	0.2	0.25	0.19	0.16	0.24	0.19	0.15	0.18	0.25	0.13	0.19	0.14	0.23	0.19	0.22	0.19	0.14	0.11	0.32	0.12	0.17	0.06	0.16	0.08	0.13	0.11	0.19	0.16	0.24	0.17	0.16	0.12	0.21	0.2	0.2	0.22	0.18	0.18	0.35	0.27	0.24	0.19	0.18	0.15	0.23	0.16	0.2	0.17
8.55	7402.26	0.27	0.24	0.13	0.14	0.22	0.17	0.1	0.17	0.24	0.1	0.12	0.08	0.22	0.17	0.15	0.18	0.09	0.07	0.3	0.09	0.07	0.05	0.04	0.05	-0.03	0.08	0.16	0.13	0.17	0.14	0.09	0.09	0.16	0.18	0.18	0.2	0.13	0.16	0.42	0.27	0.22	0.18	0.13	0.12	0.16	0.13	0.25	0.14
8.6	7405.52	0.13	0.22	0.1	0.11	0.19	0.13	0.1	0.13	0.14	0.08	0.07	0.03	0.09	0.14	0.09	0.15	-0.03	0.03	0.26	0.05	0.17	0.02	0.1	0	0.02	0.04	0.06	0.09	0.12	0.11	-0.01	0.05	0.15	0.17	0.12	0.18	0.13	0.14	0.19	0.25	0.12	0.15	0.06	0.08	0.09	0.09	0.09	0.11
8.65	7408.81	0.11	0.19	0.06	0.08	0.07	0.08	0.07	0.09	0.06	0.06	0	-0.02	0.04	0.09	0.07	0.12	-0.04	-0.01	0.1	0.01	0.12	0	-0.01	-0.04	0.04	0	-0.04	0.03	0	0.07	-0.09	0	0.08	0.14	0.08	0.15	0.1	0.12	0.15	0.21	0.1	0.13	-0.01	0.03	-0.01	0.04	0.03	0.07
8.7	7412.11	0.08	0.12	0	0.02	0.01	0.02	0.06	0.03	0.08	0.01	-0.09	-0.08	0.01	0.03	0.07	0.06	-0.1	-0.06	0.09	-0.04	0.07	-0.04	0.04	-0.09	-0.02	-0.05	-0.09	-0.02	-0.05	0.01	-0.13	-0.05	0.06	0.08	0.06	0.09	0.02	0.06	0.15	0.14	0.05	0.07	-0.09	-0.03	-0.05	-0.02	-0.07	0.01
8.75	7415.44	0.04	0.05	-0.07	-0.03	-0.01	-0.05	0.04	-0.03	0.07	-0.04	-0.13	-0.12	-0.06	-0.03	0.03	0	-0.14	-0.1	0.12	-0.09	0.1	-0.08	0.1	-0.13	-0.1	-0.09	-0.14	-0.08	-0.1	-0.05	-0.16	-0.09	0.01	0.02	0.03	0.03	-0.02	0.01	0.1	0.06	0	0.01	-0.15	-0.08	-0.1	-0.07	-0.14	-0.04
8.8	7418.78	0.01	0	-0.1	-0.06	-0.01	-0.08	0.02	-0.05	0.01	-0.06	-0.14	-0.14	-0.11	-0.07	-0.05	-0.03	-0.14	-0.11	0.06	-0.11	0.11	-0.09	0.05	-0.13	-0.1	-0.11	-0.18	-0.1	-0.13	-0.07	-0.17	-0.1	-0.03	-0.02	0.03	-0.01	-0.03	-0.03	0.03	0.01	-0.02	-0.03	-0.16	-0.11	-0.16	-0.1	-0.13	-0.07
8.85	7422.14	0	-0.07	-0.09	-0.1	-0.04	-0.13	-0.01	-0.1	0	-0.1	-0.19	-0.16	-0.09	-0.12	-0.09	-0.08	-0.17	-0.12	0	-0.14	-0.01	-0.11	0.04	-0.15	-0.05	-0.13	-0.17	-0.14	-0.12	-0.11	-0.15	-0.12	-0.02	-0.08	-0.02	-0.07	-0.08	-0.08	0	-0.07	-0.05	-0.08	-0.17	-0.14	-0.14	-0.13	-0.11	-0.1
8.9	7425.53	-0.06	-0.11	-0.13	-0.11	-0.13	-0.15	-0.1	-0.12	-0.05	-0.1	-0.18	-0.15	-0.17	-0.14	-0.13	-0.11	-0.16	-0.11	-0.04	-0.15	-0.06	-0.11	-0.07	-0.14	-0.14	-0.13	-0.21	-0.15	-0.2	-0.13	-0.19	-0.12	-0.06	-0.1	-0.11	-0.1	-0.16	-0.1	-0.04	-0.12	-0.1	-0.1	-0.22	-0.14	-0.21	-0.14	-0.14	-0.12
8.95	7428.93	-0.1	-0.16	-0.16	-0.13	-0.18	-0.17	-0.06	-0.14	-0.12	-0.12	-0.21	-0.16	-0.18	-0.16	-0.15	-0.14	-0.19	-0.12	-0.05	-0.15	0.01	-0.11	-0.12	-0.13	-0.14	-0.14	-0.19	-0.16	-0.24	-0.14	-0.23	-0.12	-0.21	-0.13	-0.12	-0.14	-0.18	-0.12	-0.11	-0.17	-0.08	-0.13	-0.26	-0.15	-0.18	-0.15	-0.16	-0.14
9	7432.35	-0.12	-0.19	-0.18	-0.15	-0.2	-0.19	-0.07	-0.17	-0.16	-0.13	-0.21	-0.16	-0.21	-0.18	-0.14	-0.16	-0.19	-0.13	-0.11	-0.15	-0.07	-0.11	-0.25	-0.13	-0.21	-0.14	-0.18	-0.17	-0.25	-0.16	-0.22	-0.14	-0.15	-0.16	-0.18	-0.17	-0.21	-0.15	-0.22	-0.21	-0.07	-0.16	-0.25	-0.17	-0.17	-0.17	-0.2	-0.16
9.05	7435.78	-0.13	-0.22	-0.15	-0.17	-0.19	-0.2	-0.13	-0.19	-0.15	-0.14	-0.22	-0.16	-0.23	-0.2	-0.12	-0.19	-0.18	-0.15	-0.21	-0.16	-0.19	-0.1	-0.29	-0.13	-0.2	-0.15	-0.21	-0.19	-0.22	-0.18	-0.21	-0.16	-0.13	-0.19	-0.14	-0.2	-0.17	-0.18	-0.2	-0.23	-0.09	-0.19	-0.2	-0.18	-0.22	-0.19	-0.17	-0.18
9.1	7439.24	-0.11	-0.25	-0.13	-0.2	-0.17	-0.21	-0.16	-0.2	-0.16	-0.17	-0.22	-0.13	-0.2	-0.22	-0.12	-0.22	-0.18	-0.16	-0.24	-0.16	-0.24	-0.1	-0.22	-0.13	-0.14	-0.15	-0.23	-0.2	-0.21	-0.2	-0.18	-0.17	-0.18	-0.23	-0.13	-0.23	-0.18	-0.22	-0.11	-0.26	-0.09	-0.22	-0.18	-0.2	-0.27	-0.2	-0.08	-0.2
9.15	7442.72	-0.11	-0.23	-0.18	-0.19	-0.16	-0.17	-0.14	-0.17	-0.22	-0.17	-0.17	-0.14	-0.17	-0.21	-0.17	-0.23	-0.14	-0.15	-0.2	-0.11	-0.24	-0.05	-0.25	-0.08	-0.19	-0.11	-0.21	-0.17	-0.23	-0.19	-0.1	-0.15	-0.21	-0.24	-0.17	-0.24	-0.21	-0.24	-0.19	-0.23	-0.12	-0.23	-0.19	-0.18	-0.23	-0.18	-0.09	-0.2
9.2	7446.21	-0.13	-0.22	-0.21	-0.17	-0.16	-0.12	-0.13	-0.14	-0.26	-0.16	-0.17	-0.12	-0.2	-0.19	-0.21	-0.23	-0.11	-0.12	-0.29	-0.07	-0.22	-0.01	-0.21	-0.03	-0.04	-0.08	-0.1	-0.14	-0.19	-0.16	-0.12	-0.12	-0.19	-0.24	-0.22	-0.24	-0.21	-0.25	-0.24	-0.2	-0.18	-0.22	-0.12	-0.15	-0.18	-0.16	-0.12	-0.19
9.25	7449.73	-0.19	-0.18	-0.22	-0.13	-0.15	-0.08	-0.14	-0.1	-0.26	-0.13	-0.15	-0.09	-0.15	-0.15	-0.18	-0.19	-0.09	-0.08	-0.16	-0.03	-0.16	0.02	-0.28	0.01	-0.04	-0.04	-0.18	-0.1	-0.19	-0.12	-0.11	-0.07	-0.2	-0.21	-0.23	-0.21	-0.23	-0.22	-0.27	-0.16	-0.2	-0.19	-0.11	-0.11	-0.15	-0.12	-0.13	-0.15
9.3	7453.26	-0.18	-0.13	-0.16	-0.08	-0.15	-0.03	-0.13	-0.05	-0.22	-0.09	-0.08	-0.05	-0.14	-0.1	-0.17	-0.14	-0.07	-0.02	-0.13	0.02	-0.17	0.06	-0.18	0.05	-0.07	0.01	-0.16	-0.04	-0.14	-0.07	-0.05	-0.02	-0.2	-0.16	-0.13	-0.15	-0.19	-0.17	-0.2	-0.11	-0.24	-0.14	-0.11	-0.06	-0.05	-0.07	-0.14	-0.1
9.35	7456.82	-0.16	-0.11	-0.1	-0.06	-0.11	0	-0.13	-0.02	-0.14	-0.07	-0.05	-0.02	-0.13	-0.08	-0.18	-0.12	-0.06	0	-0.15	0.04	-0.18	0.07	-0.07	0.07	-0.05	0.03	-0.05	-0.02	-0.12	-0.04	-0.02	0	-0.17	-0.14	-0.17	-0.14	-0.16	-0.15	-0.17	-0.09	-0.19	-0.12	-0.13	-0.03	-0.03	-0.04	-0.14	-0.08
9.4	7460.39	-0.16	-0.07	-0.09	-0.03	-0.03	0.04	-0.11	0.02	-0.17	-0.06	-0.02	0	-0.09	-0.05	-0.17	-0.1	-0.05	0.03	-0.11	0.07	-0.14	0.09	-0.03	0.11	-0.02	0.06	0.04	0.02	-0.1	-0.01	-0.01	0.04	-0.16	-0.12	-0.19	-0.11	-0.15	-0.13	-0.16	-0.04	-0.13	-0.09	-0.1	0	-0.1	-0.01	-0.1	-0.05
9.45	7463.98	-0.13	-0.05	-0.1	-0.01	-0.01	0.06	-0.05	0.04	-0.12	-0.04	0.08	0.03	-0.05	-0.02	-0.16	-0.08	0	0.05	-0.11	0.09	-0.09	0.09	0.04	0.12	-0.02	0.08	0.07	0.05	0	0.01	0.07	0.06	-0.14	-0.1	-0.11	-0.09	-0.14	-0.11	-0.05	-0.02	-0.13	-0.07	0.04	0.03	-0.05	0.02	-0.02	-0.02
9.5	7467.59	-0.12	-0.02	-0.07	0.02	0.02	0.08	-0.06	0.06	-0.06	-0.03	0.08	0.04	-0.02	0	-0.12	-0.05	0.08	0.07	-0.1	0.1	-0.06	0.09	-0.03	0.13	0.04	0.09	0.11	0.07	0.02	0.04	0.15	0.08	-0.12	-0.07	-0.09	-0.06	-0.1	-0.08	-0.12	0.01	-0.15	-0.04	0	0.05	0.01	0.04	-0.03	0
9.55	7471.22	-0.08	0.01	-0.01	0.04	0.08	0.09	-0.09	0.08	0	0	0.12	0.1	0.01	0.03	-0.05	-0.01	0.12	0.1	0.03	0.1	0.03	0.09	0.11	0.13	-0.01	0.1	0.13	0.08	0.11	0.06	0.14	0.1	-0.09	-0.03	-0.08	-0.02	-0.11	-0.03	-0.05	0.03	-0.05	-0.01	0.02	0.07	0.07	0.06	0	0.03
9.6	7474.87	-0.05	0.05	0.06	0.08	0.06	0.11	-0.08	0.11	0.08	0.05	0.16	0.13	-0.02	0.07	-0.01	0.04	0.1	0.12	-0.01	0.12	0.01	0.11	0.16	0.14	0.04	0.12	0.15	0.11	0.11	0.09	0.15	0.12	-0.07	0.03	-0.05	0.03	-0.04	0.02	0.04	0.07	-0.07	0.04	0.05	0.1	0.06	0.09	0.04	0.07
9.65	7478.53	-0.04	0.07	0.06	0.09	0.03	0.12	-0.09	0.11	0.07	0.07	0.15	0.11	0.02	0.08	-0.03	0.06	0.07	0.12	-0.05	0.12	0.03	0.11	0.06	0.13	0.09	0.12	0.17	0.11	0.09	0.1	0.15	0.12	-0.03	0.05	-0.07	0.06	-0.04	0.05	0.02	0.09	-0.09	0.06	0.1	0.1	0.04	0.1	0.05	0.08
9.7	7482.22	-0.01	0.09	0.02	0.09	0.06	0.1	-0.11	0.1	0.01	0.08	0.1	0.07	0.09	0.09	-0.02	0.08	0.07	0.1	-0.03	0.1	0.14	0.1	0.02	0.11	0.08	0.1	0.16	0.1	0.09	0.09	0.13	0.1	-0.02	0.08	-0.05	0.08	0	0.07	-0.06	0.1	-0.07	0.08	0.11	0.09	0.05	0.09	0.03	0.09
9.75	7485.92	0.01	0.1	0.07	0.09	0.1	0.08	-0.05	0.09	0.02	0.09	0.05	0.06	0.05	0.08	0.06	0.09	0.09	0.08	-0.08	0.08	0.15	0.09	0.11	0.07	0.11	0.08	0.15	0.08	0.08	0.09	0.11	0.08	-0.01	0.1	0.03	0.1	0.06	0.1	-0.09	0.1	-0.03	0.1	0.05	0.08	0.07	0.08	0.03	0.09
9.8	7489.65	0.05	0.09	0.08	0.07	0.06	0.06	-0.04	0.06	0.03	0.08	0.07	0.04	0.13	0.07	0.12	0.09	0.09	0.05	0.06	0.05	0	0.06	0.1	0.04	0.17	0.05	0.14	0.05	0.1	0.06	0.07	0.05	0.04	0.09	0.09	0.09	0.07	0.09	-0.02	0.09	0.01	0.09	0.13	0.06	0.08	0.06	0.06	0.07
9.85	7493.39	0.02	0.07	0.04	0.05	0.03	0.03	-0.05	0.04	0.04	0.07	0.06	0	0.03	0.06	0.08	0.08	0.04	0.02	-0.05	0.03	0.1	0.03	0.09	0.01	0.04	0.03	0.03	0.04	0.06	0.05	0.03	0.02	-0.02	0.09	0.03	0.09	0.04	0.09	0.05	0.06	0.02	0.08	0.13	0.04	0.01	0.05	0.05	0.06
9.9	7497.15	0.05	0.08	0.07	0.05	-0.02	0.02	-0.02	0.03	0.07	0.08	0.03	0.02	-0.01	0.07	0.08	0.09	0.05	0.02	0	0.01	0.21	0.01	0.04	0	0.03	0.02	0.01	0.03	0.09	0.04	0.06	0.01	0.1	0.1	0.14	0.1	0.09	0.11	0.14	0.06	0.07	0.09	0.1	0.04	0.03	0.05	0.02	0.06
9.95	7500.93	0.09	0.07	0.09	0.06	0	0.01	-0.01	0.02	0.01	0.09	0.03	0.03	0.05	0.07	0.1	0.1	0.05	0.02	0.09	0	0.22	-0.01	-0.05	-0.02	0.08	0.01	0.06	0.03	0.09	0.04	0.08	0.02	0.11	0.11	0.16	0.1	0.1	0.13	0.1	0.05	0.03	0.1	0.07	0.04	0.04	0.05	0.03	0.07
10	7504.74	0.09	0.06	0.09	0.05	0.03	0	-0.05	0	0.05	0.08	0.06	0.03	0.11	0.07	0.09	0.1	0.01	0.01	0.07	-0.01	0.13	-0.04	-0.06	-0.03	0.09	-0.01	0.08	0.02	0.04	0.04	0.04	0.01	0.12	0.11	0.15	0.1	0.13	0.12	0.01	0.03	0.01	0.09	0.04	0.04	0.03	0.05	0.06	0.06
10.05	7508.55	0.12	0.05	0.15	0.03	-0.04	-0.01	-0.04	-0.01	0.13	0.06	0.06	0.03	0.11	0.06	0.09	0.08	0.02	0.01	0.05	-0.02	0	-0.05	0.03	-0.04	0.09	-0.01	0.06	0.02	0.07	0.03	0.01	0	0.16	0.09	0.15	0.08	0.19	0.11	0.06	0.02	0.04	0.07	0.02	0.04	0.08	0.04	0.05	0.05
10.1	7512.39	0.12	0.04	0.09	0.02	0	-0.02	0.08	-0.02	0.14	0.05	0.01	0.01	0.09	0.05	0.14	0.07	0.01	-0.01	0.07	-0.03	0.17	-0.06	-0.04	-0.05	0.07	-0.03	-0.06	0.01	0.03	0.01	0.02	-0.02	0.14	0.08	0.12	0.07	0.19	0.09	0.07	0.01	0.07	0.06	0.03	0.02	-0.01	0.03	0.06	0.04
10.15	7516.25	0.07	0.08	0.06	0.06	0.09	0.02	0.11	0.03	0.13	0.07	0.01	0.03	-0.03	0.08	0.09	0.1	0.01	0.03	0	-0.01	0.08	-0.03	0.03	-0.03	-0.02	0	-0.01	0.04	0.02	0.05	-0.03	0.02	0.1	0.11	0.06	0.11	0.1	0.12	0.01	0.05	0.13	0.1	0.01	0.05	0.04	0.06	0.01	0.07
10.2	7520.13	0.02	0.08	0.09	0.06	0.07	0.02	0.05	0.03	0.18	0.07	0.01	0.05	0.07	0.08	0.08	0.11	-0.02	0.03	0.03	-0.01	-0.01	-0.04	0.18	-0.03	-0.07	0	-0.02	0.04	0.02	0.05	-0.06	0.02	0.07	0.12	0.12	0.11	0.14	0.13	0.03	0.06	0.12	0.1	-0.01	0.05	-0.02	0.06	0.01	0.08
10.25	7524.02	0.04	0.08	0.12	0.06	0.05	0.03	0.02	0.03	0.11	0.06	0.02	0.04	0.12	0.08	0.09	0.09	-0.02	0.03	0.1	0	0.01	-0.04	0.17	-0.02	-0.04	0	0	0.04	0.03	0.05	-0.05	0.02	0.09	0.1	0.14	0.1	0.09	0.11	0.08	0.06	0.1	0.09	0	0.05	-0.01	0.06	0.02	0.07
10.3	7527.94	0.09	0.1	0.11	0.07	0.06	0.06	0.07	0.06	0.05	0.06	0.01	0.06	0.05	0.09	0.08	0.1	0.03	0.04	0.11	0.03	-0.01	-0.01	0.02	0.01	0	0.03	0.09	0.06	0.06	0.07	-0.02	0.04	0.11	0.1	0.07	0.1	0.07	0.1	0.07	0.1	0.1	0.09	0.05	0.07	0.09	0.07	0.04	0.08
10.35	7531.87	0.08	0.12	0.06	0.08	0.01	0.08	0.16	0.08	0.06	0.06	-0.05	0.02	0.12	0.09	0.05	0.09	0.01	0.05	0.05	0.05	-0.17	0.02	-0.04	0.03	0	0.04	0.09	0.07	0.08	0.08	0.01	0.05	0.09	0.1	0	0.1	0.07	0.09	0.07	0.12	0.12	0.09	0.11	0.07	0.06	0.07	0.06	0.08
10.4	7535.82	0.08	0.12	0.11	0.07	0.1	0.1	0.11	0.09	0.02	0.04	-0.01	0.04	0.05	0.08	0.02	0.07	0.07	0.04	0.13	0.06	-0.06	0.03	0.11	0.04	0.04	0.05	-0.01	0.07	-0.03	0.08	0.01	0.05	0.09	0.08	0.06	0.09	0.06	0.06	0.02	0.14	0.15	0.08	0.15	0.06	0.06	0.07	0.03	0.07
10.45	7539.8	0.11	0.1	0.16	0.07	0.04	0.08	0.23	0.08	0	0.04	0.01	0.05	0.07	0.07	0.07	0.07	0.09	0.04	0.12	0.05	-0.06	0.02	0.03	0.03	-0.06	0.04	0.02	0.06	0.03	0.07	0.06	0.05	0.1	0.07	0.16	0.08	0.09	0.06	0.02	0.12	0.21	0.07	0.14	0.06	0.07	0.06	0.04	0.06
10.5	7543.79	0.08	0.09	0.15	0.06	0.02	0.07	0.23	0.07	0.06	0.03	0.06	0.04	0.12	0.06	0.1	0.06	0.07	0.04	0.06	0.04	-0.25	0.02	-0.02	0.03	0.06	0.04	-0.01	0.06	0.1	0.06	0.1	0.05	0.07	0.06	0.03	0.07	0.02	0.05	0.05	0.1	0.15	0.06	0.11	0.05	0.06	0.05	0.02	0.06
10.55	7547.8	0.09	0.09	0.1	0.07	0.08	0.07	0.22	0.07	-0.01	0.04	0.09	0.08	0.12	0.07	0.06	0.07	0.04	0.05	0.02	0.04	-0.17	0.02	0.04	0.03	0.15	0.04	0.02	0.06	0.1	0.07	0.1	0.06	0	0.07	-0.06	0.08	0.03	0.07	0.06	0.1	0.01	0.07	0.11	0.06	0.04	0.06	0.04	0.06
10.6	7551.83	0.14	0.09	0.08	0.06	0.07	0.07	0.24	0.08	-0.05	0.04	0.06	0.05	0.08	0.06	0	0.06	0.06	0.05	-0.02	0.04	0.1	0.04	0.06	0.03	0.05	0.04	0.11	0.05	0.04	0.06	0.08	0.05	0.05	0.07	0.01	0.07	0.05	0.06	0.07	0.1	0.04	0.07	0.14	0.05	0.07	0.05	0.1	0.06
10.65	7555.87	0.08	0.05	0.07	0.03	-0.05	0.04	0.16	0.05	-0.08	0	0.04	0.02	0.07	0.02	0.01	0.02	0.15	0.02	-0.11	0.02	-0.04	0.03	-0.08	0.02	0	0.02	0.07	0.02	0.01	0.03	0.04	0.02	0.1	0.02	0.09	0.03	0.02	0.01	0.11	0.07	0.13	0.02	0.11	0.01	0.14	0.01	0.1	0.02
10.7	7559.94	0.06	0.02	0.05	0	-0.07	0.03	0.15	0.03	-0.02	-0.02	0.06	0	-0.01	-0.01	-0.02	-0.01	0.05	0	-0.18	0.01	-0.21	0.02	-0.21	0.01	0	0.01	0.04	0	0.06	0	0	0	-0.01	-0.02	-0.04	-0.01	-0.01	-0.03	0.17	0.04	0.04	-0.01	-0.01	-0.01	0.09	-0.01	0.07	-0.01
10.75	7564.03	0.04	0.01	0.01	-0.01	-0.05	0.01	0.07	0.01	0.03	-0.02	0.01	0.01	0.02	-0.02	-0.02	-0.02	-0.01	-0.01	-0.13	0	-0.14	0.01	0.01	0	0.08	0	-0.04	-0.01	0	-0.01	-0.02	-0.01	-0.01	-0.02	-0.1	-0.01	-0.06	-0.03	0.1	0.03	-0.05	-0.01	0.04	-0.02	0	-0.02	-0.03	-0.02
10.8	7568.13	0.04	0	-0.06	-0.02	0	0.01	-0.1	0	-0.06	-0.03	-0.05	-0.04	-0.01	-0.02	0.06	-0.03	0.02	-0.02	-0.24	0	-0.16	0.01	0.01	0	-0.02	0	-0.01	-0.01	-0.06	-0.01	0	-0.01	0	-0.03	0.02	-0.02	0.1	-0.04	0.16	0.02	0.01	-0.02	0.02	-0.02	0	-0.02	-0.06	-0.02
10.85	7572.26	0.06	-0.01	-0.05	-0.03	0.1	-0.01	-0.06	-0.02	0.16	-0.03	-0.09	-0.06	0.05	-0.03	0.04	-0.03	0.01	-0.03	-0.12	-0.01	0.06	0.01	0	-0.01	-0.06	-0.01	0.03	-0.03	0.01	-0.03	0.03	-0.03	0.02	-0.03	0.04	-0.03	0.04	-0.04	0.03	0	0.12	-0.03	-0.04	-0.03	0.06	-0.03	0.02	-0.03
10.9	7576.4	0.02	-0.05	-0.03	-0.06	0.12	-0.05	0.05	-0.05	-0.03	-0.04	-0.13	-0.06	0.08	-0.05	-0.08	-0.05	-0.09	-0.06	0.19	-0.04	0.42	-0.03	0.14	-0.05	0.01	-0.05	-0.03	-0.06	0.06	-0.05	0.03	-0.06	-0.01	-0.05	-0.02	-0.05	-0.06	-0.05	-0.17	-0.05	0.02	-0.05	-0.07	-0.06	0.01	-0.05	0.04	-0.05
10.95	7580.56	-0.09	-0.07	-0.13	-0.07	-0.05	-0.07	-0.15	-0.08	-0.15	-0.06	-0.18	-0.1	-0.2	-0.07	-0.09	-0.07	-0.15	-0.07	0.09	-0.06	0.28	-0.05	0.1	-0.06	-0.13	-0.06	-0.15	-0.07	-0.08	-0.07	-0.01	-0.08	-0.05	-0.07	-0.05	-0.07	-0.09	-0.07	0.06	-0.08	-0.17	-0.07	-0.1	-0.07	-0.16	-0.07	-0.09	-0.07
11	7584.75	-0.12	-0.09	-0.12	-0.08	-0.03	-0.08	-0.14	-0.09	-0.14	-0.06	-0.23	-0.07	-0.13	-0.08	-0.14	-0.08	-0.16	-0.08	-0.02	-0.07	0.15	-0.06	0.11	-0.07	-0.08	-0.07	-0.15	-0.08	-0.03	-0.08	-0.09	-0.08	-0.02	-0.08	-0.04	-0.08	-0.14	-0.07	0.12	-0.09	-0.16	-0.08	-0.17	-0.08	-0.02	-0.08	-0.03	-0.08
11.05	7588.95	-0.14	-0.14	-0.08	-0.12	-0.03	-0.13	-0.07	-0.13	-0.14	-0.1	-0.16	-0.1	-0.14	-0.11	-0.04	-0.11	-0.18	-0.11	-0.04	-0.11	0.2	-0.11	-0.06	-0.11	-0.15	-0.11	-0.13	-0.11	-0.05	-0.12	-0.08	-0.11	0	-0.11	-0.12	-0.12	-0.15	-0.11	-0.11	-0.15	-0.06	-0.12	-0.11	-0.11	-0.07	-0.11	0.03	-0.11
11.1	7593.17	-0.09	-0.18	-0.12	-0.13	-0.1	-0.17	0.03	-0.16	-0.13	-0.12	-0.14	-0.11	-0.12	-0.13	-0.05	-0.13	-0.17	-0.11	0.05	-0.14	0.2	-0.15	0.05	-0.13	-0.04	-0.14	-0.04	-0.13	-0.1	-0.14	-0.21	-0.12	-0.07	-0.13	-0.16	-0.14	-0.09	-0.12	-0.14	-0.2	-0.04	-0.14	-0.14	-0.12	-0.12	-0.12	-0.01	-0.13
11.15	7597.4	-0.08	-0.22	-0.19	-0.16	-0.1	-0.21	0.03	-0.2	-0.15	-0.13	-0.1	-0.07	-0.1	-0.16	-0.1	-0.15	-0.17	-0.13	0.19	-0.18	0.08	-0.18	0.09	-0.16	0.01	-0.16	-0.05	-0.16	-0.11	-0.16	-0.27	-0.14	-0.1	-0.15	-0.13	-0.17	-0.1	-0.12	-0.06	-0.26	-0.11	-0.15	-0.2	-0.14	-0.12	-0.14	-0.06	-0.14
11.2	7601.66	-0.1	-0.25	-0.18	-0.17	-0.05	-0.24	-0.03	-0.22	-0.11	-0.14	-0.02	-0.09	-0.12	-0.18	-0.07	-0.17	-0.17	-0.14	0.23	-0.2	0.07	-0.21	-0.14	-0.18	-0.15	-0.19	-0.13	-0.18	-0.09	-0.18	-0.18	-0.16	-0.1	-0.17	-0.09	-0.19	-0.14	-0.14	-0.03	-0.3	-0.1	-0.18	-0.2	-0.16	-0.11	-0.16	-0.05	-0.16
[truncated: 32 more columns]
